# Supplementary material for: Pd-catalyzed sequential intramolecular annulation/intermolecular [3+2] cycloaddition of 5-allenyloxazolidine-2,4-diones with dipoles: synthesis of spiroheterocycles
Source: Royal Society of Chemistry journal article supplement (doi:10.1039/d4cc03551h), 2024-01-01
Supplement: d4cc03551h1.pdf [file d4cc03551h1.pdf]

Electronic Supplementary Information

**Pd-Catalyzed Sequential Intramolecular Annulation/  
Intermolecular [3+2] Cycloaddition of 5-Allenylloxazolidine-2,4-  
diones with Dipoles: Synthesis of Spiroheterocycles**

Yujie Dong, Jun Liu, Rongjin Ning, Fazhou Yang, Cheng Zhang\* and Hongchao Guo\*

Department of Chemistry and Innovation Center of Pesticide Research, China Agricultural  
University, Beijing 100193, P. R. China

Email: [hchguo@cau.edu.cn](mailto:hchguo@cau.edu.cn), [zhangc9711@cau.edu.cn](mailto:zhangc9711@cau.edu.cn)

**Contents**

|                                                                       |     |
|-----------------------------------------------------------------------|-----|
| General Information                                                   | S2  |
| Preparation of Substrates <b>1</b> , <b>2</b> , <b>4</b> and <b>6</b> | S2  |
| General Procedure for Preparation of Product <b>3</b>                 | S2  |
| General Procedure for Preparation of Product <b>5</b>                 | S3  |
| General Procedure for Preparation of Product <b>7</b>                 | S3  |
| Scale-up Synthesis of the Product <b>3aa</b>                          | S3  |
| Further Transformations of the Product <b>3aa</b>                     | S3  |
| Characterization Data of the All Products                             | S4  |
| <sup>1</sup> H and <sup>13</sup> C NMR Spectra of All Products        | S22 |
| X-Ray Crystallographic Data of <b>3aa</b> , <b>7ja</b> and <b>8</b>   | S57 |

## General Information

All reactions were performed under Argon atmospheres in oven-dried glassware with magnetic stirring. Unless otherwise stated, all reagents were purchased from commercial suppliers and used without further purification. All solvents were purified and dried according to standard methods prior to use. Organic solutions were concentrated under reduced pressure on a rotary evaporator or an oil pump. Reactions were monitored through thin layer chromatography (TLC) on silica gel–precoated glass plates. Visualization on TLC was achieved by use of UV light (254 nm), iodine or basic  $\text{KMnO}_4$  indicator. Flash column chromatography was performed using Qingdao Haiyang flash silica gel (200–300 mesh). Infrared spectra were recorded using a Bruker Optics TENSOR 27 instrument.  $^1\text{H}$  and  $^{13}\text{C}$  NMR spectra were recorded in  $\text{CDCl}_3$  using a 500 MHz NMR instrument (referenced internally to  $\text{Me}_4\text{Si}$ ).  $^1\text{H}$  NMR data are reported as follows: chemical shift, multiplicity (s = singlet; d = doublet; t = triplet; q = quartet; dd = doublet of doublets; m = multiplet; br = broad), coupling constant (Hz), and integral. Data for  $^{13}\text{C}$  NMR spectra are reported in terms of chemical shift. HRMS analyses were carried out on a Thermo Q-Exactive high resolution mass spectrometer (Thermo Scientific, Waltham, MA, USA) apparatus. The type of mass analyzer used for HRMS measurement is TOF. Data were analyzed using instrument-supplied software Xcalibur Qual Browser. Melting points were determined by an X-4 digital micro melting point apparatus. X-ray crystallographic data were collected using a Bruker D8 venture. In addition, unless noted otherwise, in the reactions that need heating, the heat source is oil bath.

## Preparation of Substrates 1, 2, 4 and 6

The nitrile oxides **1**,<sup>1</sup> 5-allenyloxazolidine-2,4-diones **2**,<sup>2</sup> hydrazonyl halides **4**<sup>3</sup> and azomethine imines **6**<sup>4</sup> were synthesized using known literature procedures.

## General Procedure for Preparation of Product 3

Under argon atmosphere, an oven-dried 10 mL of Schlenk tube was charged with nitrile oxides **1** (0.1 mmol), 5-allenyloxazolidine-2,4-diones **2** (0.15 mmol),  $\text{Pd}_2\text{dba}_3\cdot\text{CHCl}_3$  (2.5 mol%, 2.6 mg), XantPhos (5 mol%, 2.9 mg) in 1 mL of over-dry  $\text{CHCl}_3$  at 60 °C. Once the starting material was completely consumed (monitored by TLC), the mixture was concentrated to dryness. The residue was purified by flash column chromatography to afford the product **3** (petroleum ether / EtOAc as the eluent).

---

(1) (a) Pan, T.; Gao, X.; Yang, S.; Wang, L.; Hu, Y.; Liu, M.; Wang, W.; Wu, Y.; Zheng, B.; Guo, H. *Org. Lett.* **2021**, *23*, 5750–5754. (b) Zhang, L.; Liu, H.; Qiao, G.; Hou, Z.; Liu, Y.; Xiao, Y.; Guo, H. *J. Am. Chem. Soc.* **2015**, *137*, 4316–4319.

(2) Dong, Y.; Liu, J.; Li, K.; Han, S.; Liang, B.; Yang, F.; Yu, S.; Wu, Y.; Zhang, C.; Guo, H. *Org. Lett.* **2023**, *25*, 6328–6333

(3) (a) Bazian, A.; Taheri, M.; Alavi, H. *Russ. J. Gen. Chem.* **2014**, *84*, 586–592. (b) Garve, L. K. B.; Petzold, M.; Jones, P. G.; Werz, D. B. *Org. Lett.* **2016**, *18*, 564–567

(4) (a) Wang, T.; Shao, A.; Feng, H.; Yang, S.; Gao, M.; Tian, J.; Lei, A. *Tetrahedron* **2015**, *71*, 4473–4477.

(b) Hashimoto, T.; Maeda, Y.; Omote, M.; Nakatsu, H.; Maruoka, K. *J. Am. Chem. Soc.* **2010**, *132*, 4076–4077.

### General Procedure for Preparation of Product 5

Under argon atmosphere, an oven-dried 10 mL of Schlenk tube was charged with hydrazonyl halides **4** (0.1 mmol), 5-allenyloxazolidine-2,4-diones **2a** (0.15 mmol), Pd<sub>2</sub>dba<sub>3</sub>·CHCl<sub>3</sub> (5 mol%, 5.2 mg), XantPhos (10 mol%, 5.8 mg) and Et<sub>3</sub>N in (0.1 mmol) in 1 mL of over-dry CH<sub>2</sub>Cl<sub>2</sub> at rt. Once the starting material was completely consumed (monitored by TLC), the mixture was concentrated to dryness. The residue was purified by flash column chromatography to afford the product **5** (petroleum ether / EtOAc as the eluent).

### General Procedure for Preparation of Product 7

Under argon atmosphere, an oven-dried 10 mL of Schlenk tube was charged with azomethine imines **6** (0.1 mmol), 5-allenyloxazolidine-2,4-diones **2** (0.15 mmol), Pd<sub>2</sub>dba<sub>3</sub>·CHCl<sub>3</sub> (2.5 mol%, 2.6 mg), XantPhos (5 mol%, 2.9 mg) in 1 mL of over-dry CHCl<sub>3</sub> at rt. Once the starting material was completely consumed (monitored by TLC), the mixture was concentrated to dryness. The residue was purified by flash column chromatography to afford the product **7** (petroleum ether / EtOAc as the eluent).

### Scale-up Synthesis of the Product 3aa

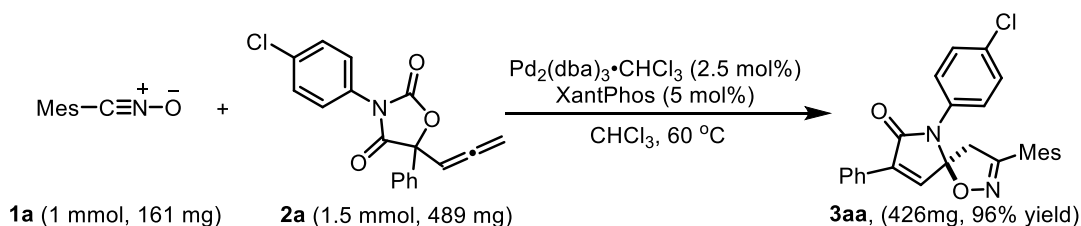

Under argon atmosphere, an oven-dried 50 mL of Schlenk tube was charged with nitrile oxide **1a** (1 mmol, 161 mg), 5-allenyloxazolidine-2,4-diones **2a** (1.5 mmol, 489 mg), Pd<sub>2</sub>dba<sub>3</sub>·CHCl<sub>3</sub> (2.5 mmol%, 26 mg), XantPhos (5 mmol%, 29 mg) in 10 mL of over-dry CHCl<sub>3</sub> at 60 °C. Once the starting material was completely consumed (monitored by TLC), the mixture was concentrated to dryness. The residue was purified through flash column chromatography (EtOAc : PE = 1:15) to afford the corresponding products **3aa** (426 mg, 96% yield).

### Further Transformations of the Product 3aa

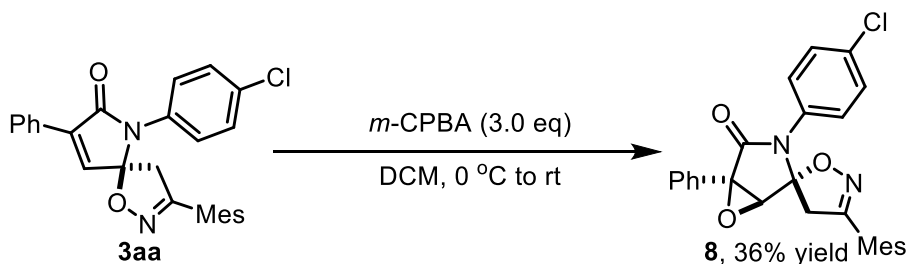

To a dry tube equipped with a stirring bar added **3aa** (44.3 mg, 0.1 mmol) and anhydrous DCM (1 mL). Dissolved *m*-CPBA (52.0 mg, 0.3 mmol) in 2 mL of DCM and added it drop by drop to the dichloride solution of **3aa** at 0 °C. The reaction mixture was stirred at 0 °C for 30 min, and then transferred it to room temperature for further reaction. Upon completion of the reaction (monitored by TLC), the mixture was concentrated to dryness. The residue was purified by flash column (EtOAc : PE = 1:15) to afford the product **8** (16.4 mg, 36% yield).

## Characterization Data of the All Products

### 6-(4-chlorophenyl)-3-mesityl-8-phenyl-1-oxa-2,6-diazaspiro[4.4]nona-2,8-dien-7-one (3aa)

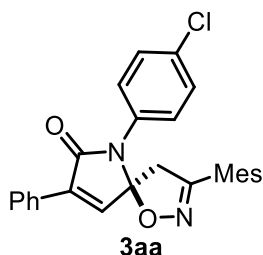

Prepared according to the general procedure (reaction time: 24 h) as described above in 93% yield (41.2 mg). It was purified by flash chromatography (EtOAc : PE=1:8) to afford a yellow solid. Melting point: 190 – 192 °C. <sup>1</sup>H NMR (500 MHz, CDCl<sub>3</sub>) δ 7.94 (dd, *J* = 7.3, 2.1 Hz, 2H), 7.52 – 7.47 (m, 2H), 7.46 – 7.41 (m, 5H), 7.22 (s, 1H), 6.83 (s, 2H), 3.48 (d, *J* = 18.9 Hz, 1H), 3.21 (d, *J* = 18.9 Hz, 1H), 2.26 (s, 3H), 1.90 (s, 6H); <sup>13</sup>C NMR (126 MHz, CDCl<sub>3</sub>) δ 166.7, 157.2, 138.4, 136.3, 135.5, 135.4, 133.2, 132.1, 128.79, 128.76, 128.7, 128.6, 127.65, 127.64, 126.7, 123.6, 98.5, 42.5, 20.0, 18.3; IR (film)  $\nu_{\max}$  2922, 1713, 1493, 1378, 1332, 1263, 1192, 1089, 1017, 886, 791, 734, 694, 648, 512 cm<sup>-1</sup>; HRMS (ESI) calcd for C<sub>27</sub>H<sub>24</sub>ClN<sub>2</sub>O<sub>2</sub><sup>+</sup> [M+H]<sup>+</sup> 443.1521, found 443.1519.

### 6-(3-fluorophenyl)-3-mesityl-8-phenyl-1-oxa-2,6-diazaspiro[4.4]nona-2,8-dien-7-one (3ab)

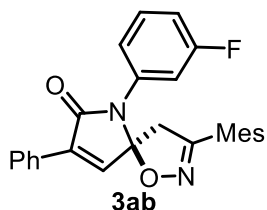

Prepared according to the general procedure (reaction time: 24 h) as described above in 95% yield (40.6 mg). It was purified by flash chromatography (EtOAc : PE = 1:8) to afford a white solid. Melting point: 186 – 188 °C. <sup>1</sup>H NMR (500 MHz, CDCl<sub>3</sub>) δ 7.98 – 7.89 (m, 2H), 7.48 – 7.29 (m, 6H), 7.21 (s, 1H), 7.08 (tdd, *J* = 8.3, 2.6, 1.1 Hz, 1H), 6.83 (s, 2H), 3.46 (d, *J* = 19.0 Hz, 1H), 3.23 (d, *J* = 19.0 Hz, 1H), 2.25 (s, 3H), 1.93 (s, 6H); <sup>13</sup>C NMR (126 MHz, CDCl<sub>3</sub>) δ 166.6, 162.05 (d, *J* = 247.8 Hz), 157.3, 138.4, 136.4, 135.4, 135.2, 135.1, 135.0, 129.7, 129.6, 128.74, 128.72, 127.7, 127.6, 126.7, 123.6, 122.65 (d, *J* = 3.3 Hz), 114.26 (dd, *J* = 31.7, 22.0 Hz), 98.6, 42.4, 20.0, 18.3; IR (film)  $\nu_{\max}$  2923, 1717, 1610, 1593, 1492, 1451, 1377, 1333, 1248, 1202, 854, 834, 787, 750, 691 cm<sup>-1</sup>; HRMS (ESI) calcd for C<sub>27</sub>H<sub>24</sub>FN<sub>2</sub>O<sub>2</sub><sup>+</sup> [M+H]<sup>+</sup> 427.1816, found 427.1814.

**6-(4-fluorophenyl)-3-mesityl-8-phenyl-1-oxa-2,6-diazaspiro[4.4]nona-2,8-dien-7-one (3ac)**

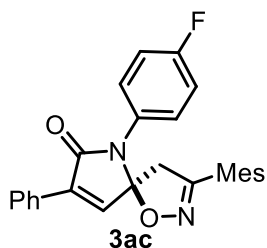

Prepared according to the general procedure (reaction time: 24 h) as described above in 85% yield (36.2 mg). It was purified by flash chromatography (EtOAc : PE = 1:8) to afford a white solid. Melting point: 192 – 194 °C.  $^1\text{H}$  NMR (500 MHz,  $\text{CDCl}_3$ )  $\delta$  7.98 – 7.89 (m, 2H), 7.55 – 7.47 (m, 2H), 7.46 – 7.38 (m, 3H), 7.21 (s, 1H), 7.19 – 7.10 (m, 2H), 6.81 (s, 2H), 3.48 (d,  $J$  = 18.9 Hz, 1H), 3.20 (d,  $J$  = 19.0 Hz, 1H), 2.24 (s, 3H), 1.87 (s, 6H);  $^{13}\text{C}$  NMR (126 MHz,  $\text{CDCl}_3$ )  $\delta$  166.8, 161.37 (d,  $J$  = 248.6 Hz), 157.1, 138.4, 136.3, 135.4, 129.6, 129.5, 129.4, 129.3, 128.9, 128.7, 127.63, 127.61, 126.7, 123.6, 115.51 (d,  $J$  = 22.6 Hz), 98.4, 42.5, 20.0, 18.2; IR (film)  $\nu_{\text{max}}$  2922, 1754, 1715, 1510, 1493, 1450, 1383, 1333, 1229, 1196, 888, 819, 788, 694, 521, 422  $\text{cm}^{-1}$ ; HRMS (ESI) calcd for  $\text{C}_{27}\text{H}_{24}\text{FN}_2\text{O}_2^+$   $[\text{M}+\text{H}]^+$  427.1816, found 427.1814.

**6-(3-chlorophenyl)-3-mesityl-8-phenyl-1-oxa-2,6-diazaspiro[4.4]nona-2,8-dien-7-one (3ad)**

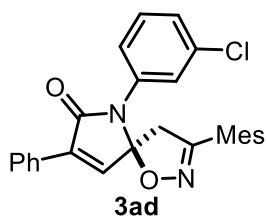

Prepared according to the general procedure (reaction time: 24 h) as described above in 89% yield (39.5 mg). It was purified by flash chromatography (EtOAc : PE = 1:8) to afford a light yellow solid. Melting point: 193 – 195 °C.  $^1\text{H}$  NMR (500 MHz,  $\text{CDCl}_3$ )  $\delta$  7.97 – 7.90 (m, 2H), 7.58 (t,  $J$  = 1.9 Hz, 1H), 7.49 – 7.31 (m, 6H), 7.21 (s, 1H), 6.82 (s, 2H), 3.47 (d,  $J$  = 18.9 Hz, 1H), 3.21 (d,  $J$  = 19.0 Hz, 1H), 2.25 (s, 3H), 1.93 (s, 6H);  $^{13}\text{C}$  NMR (126 MHz,  $\text{CDCl}_3$ )  $\delta$  166.6, 157.3, 138.4, 136.4, 135.5, 135.2, 134.8, 134.1, 129.5, 128.7, 128.7, 127.7, 127.6, 127.3, 127.2, 126.7, 125.3, 123.6, 98.5, 42.4, 20.0, 18.3; IR (film)  $\nu_{\text{max}}$  2923, 1717, 1593, 1480, 1375, 1332, 1194, 1133, 1044, 887, 851, 809, 788, 742, 694  $\text{cm}^{-1}$ ; HRMS (ESI) calcd for  $\text{C}_{27}\text{H}_{24}\text{ClN}_2\text{O}_2^+$   $[\text{M}+\text{H}]^+$  443.1521, found 443.1519.

**6-(4-bromophenyl)-3-mesityl-8-phenyl-1-oxa-2,6-diazaspiro[4.4]nona-2,8-dien-7-one (3ae)**

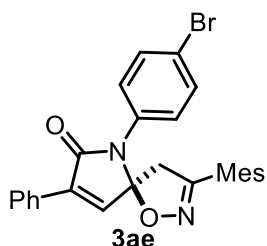

Prepared according to the general procedure (reaction time: 24 h) as described above in 90% yield (44.1 mg). It was purified by flash chromatography (EtOAc : PE = 1:8) to afford a orange solid. Melting point: 196 – 198 °C.  $^1\text{H}$  NMR (500 MHz,  $\text{CDCl}_3$ )  $\delta$  7.96 – 7.89 (m, 2H), 7.61 – 7.54 (m, 2H), 7.47 – 7.38 (m, 5H), 7.21 (s, 1H), 6.82 (s, 2H), 3.47 (d,  $J = 19.0$  Hz, 1H), 3.19 (d,  $J = 19.0$  Hz, 1H), 2.25 (s, 3H), 1.90 (s, 6H);  $^{13}\text{C}$  NMR (126 MHz,  $\text{CDCl}_3$ )  $\delta$  166.6, 157.2, 138.4, 136.3, 135.4, 135.3, 132.6, 131.7, 128.9, 128.8, 128.7, 127.64, 127.63, 126.7, 123.6, 121.2, 98.4, 42.5, 20.0, 18.2; IR (film)  $\nu_{\text{max}}$  2923, 1715, 1491, 1449, 1378, 1333, 1195, 1099, 1070, 1014, 886, 851, 792, 694, 648  $\text{cm}^{-1}$ ; HRMS (ESI) calcd for  $\text{C}_{27}\text{H}_{24}\text{BrN}_2\text{O}_2^+$   $[\text{M}+\text{H}]^+$  487.1016, found 487.1013.

**3-mesityl-8-phenyl-6-(*m*-tolyl)-1-oxa-2,6-diazaspiro[4.4]nona-2,8-dien-7-one (3af)**

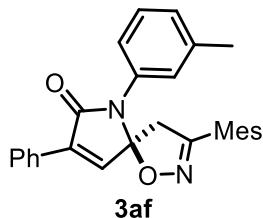

Prepared according to the general procedure (reaction time: 24 h) as described above in 91% yield (38.3 mg). It was purified by flash chromatography (EtOAc : PE = 1:8) to afford a white solid. Melting point: 193 – 195 °C.  $^1\text{H}$  NMR (500 MHz,  $\text{CDCl}_3$ )  $\delta$  7.99 – 7.90 (m, 2H), 7.47 – 7.37 (m, 3H), 7.36 – 7.27 (m, 3H), 7.20 (s, 1H), 7.19 – 7.16 (m, 1H), 6.80 (s, 2H), 3.45 (d,  $J = 18.9$  Hz, 1H), 3.24 (d,  $J = 18.9$  Hz, 1H), 2.36 (s, 3H), 2.24 (s, 3H), 1.86 (s, 6H);  $^{13}\text{C}$  NMR (126 MHz,  $\text{CDCl}_3$ )  $\delta$  166.8, 156.9, 138.6, 138.2, 136.3, 135.5, 135.4, 133.3, 129.0, 128.5, 128.4, 128.1, 128.0, 127.6, 127.5, 126.7, 124.6, 123.8, 98.5, 42.3, 20.3, 20.0, 18.2; IR (film)  $\nu_{\text{max}}$  2962, 2921, 1713, 1492, 1378, 1204, 1091, 1019, 888, 854, 790, 695, 420  $\text{cm}^{-1}$ ; HRMS (ESI) calcd for  $\text{C}_{28}\text{H}_{27}\text{N}_2\text{O}_2^+$   $[\text{M}+\text{H}]^+$  423.2067, found 423.2065.

### 3-mesityl-8-phenyl-6-(*p*-tolyl)-1-oxa-2,6-diazaspiro[4.4]nona-2,8-dien-7-one (3ag)

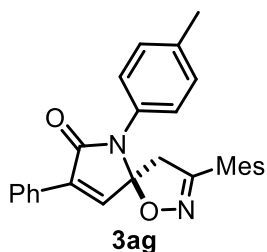

Prepared according to the general procedure (reaction time: 24 h) as described above in 99% yield (42.0 mg). It was purified by flash chromatography (EtOAc : PE = 1:8) to afford a brown solid. Melting point: 160 – 162 °C. <sup>1</sup>H NMR (500 MHz, CDCl<sub>3</sub>) δ 7.98 – 7.91 (m, 2H), 7.44 – 7.36 (m, 5H), 7.25 (d, *J* = 3.1 Hz, 2H), 7.20 (s, 1H), 6.79 (s, 2H), 3.45 (d, *J* = 18.9 Hz, 1H), 3.23 (d, *J* = 18.9 Hz, 1H), 2.37 (s, 3H), 2.23 (s, 3H), 1.84 (s, 6H); <sup>13</sup>C NMR (126 MHz, CDCl<sub>3</sub>) δ 166.8, 156.9, 138.2, 137.4, 136.2, 135.6, 135.5, 130.7, 129.2, 129.1, 128.5, 127.6, 127.5, 127.4, 126.7, 123.8, 98.5, 42.3, 20.1, 20.0, 18.1; IR (film)  $\nu_{\max}$  2961, 1709, 1513, 1382, 1262, 1196, 1130, 1102, 1031, 887, 850, 803, 786, 734, 695, 514 cm<sup>-1</sup>; HRMS (ESI) calcd for C<sub>28</sub>H<sub>27</sub>N<sub>2</sub>O<sub>2</sub><sup>+</sup> [M+H]<sup>+</sup> 423.2067, found 423.2065.

### 3-mesityl-6-(3-methoxyphenyl)-8-phenyl-1-oxa-2,6-diazaspiro[4.4]nona-2,8-dien-7-one (3ah)

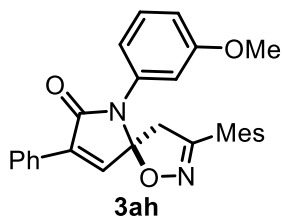

Prepared according to the general procedure (reaction time: 24 h) as described above in 86% yield (37.9 mg). It was purified by flash chromatography (EtOAc : PE = 1:6) to afford a light yellow solid. Melting point: 193 – 195 °C. <sup>1</sup>H NMR (500 MHz, CDCl<sub>3</sub>) δ 7.98 – 7.91 (m, 2H), 7.46 – 7.38 (m, 3H), 7.37 – 7.31 (m, 1H), 7.20 (s, 1H), 7.12 – 7.06 (m, 2H), 6.96 – 6.89 (m, 1H), 6.81 (s, 2H), 3.80 (s, 3H), 3.45 (d, *J* = 18.9 Hz, 1H), 3.27 (d, *J* = 18.9 Hz, 1H), 2.24 (s, 3H), 1.89 (s, 6H); <sup>13</sup>C NMR (126 MHz, CDCl<sub>3</sub>) δ 166.7, 159.5, 157.1, 138.3, 136.3, 135.6, 135.4, 134.5, 129.2, 129.0, 128.6, 127.6, 127.5, 126.7, 123.8, 119.6, 113.6, 112.6, 98.6, 54.4, 42.3, 20.0, 18.2; IR (film)  $\nu_{\max}$  2924, 1712, 1603, 1492, 1453, 1379, 1332, 1286, 1254, 1209, 1043, 888, 854, 828, 786, 693 cm<sup>-1</sup>; HRMS (ESI) calcd for C<sub>28</sub>H<sub>27</sub>N<sub>2</sub>O<sub>3</sub><sup>+</sup> [M+H]<sup>+</sup> 439.2016, found 439.2016.

**3-mesityl-6-(4-methoxyphenyl)-8-phenyl-1-oxa-2,6-diazaspiro[4.4]nona-2,8-dien-7-one (3ai)**

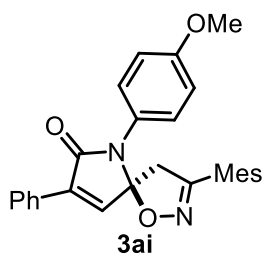

Prepared according to the general procedure (reaction time: 24 h) as described above in 98% yield (42.9 mg). It was purified by flash chromatography (EtOAc : PE = 1:6) to afford a yellow solid. Melting point: 218 – 220 °C.  $^1\text{H}$  NMR (500 MHz,  $\text{CDCl}_3$ )  $\delta$  7.98 – 7.91 (m, 2H), 7.47 – 7.36 (m, 5H), 7.20 (s, 1H), 7.00 – 6.93 (m, 2H), 6.80 (s, 2H), 3.82 (s, 3H), 3.47 (d,  $J = 18.9$  Hz, 1H), 3.24 (d,  $J = 18.9$  Hz, 1H), 2.24 (s, 3H), 1.86 (s, 6H);  $^{13}\text{C}$  NMR (126 MHz,  $\text{CDCl}_3$ )  $\delta$  167.0, 158.6, 156.8, 138.2, 136.1, 135.6, 135.5, 129.11, 129.09, 128.5, 127.6, 127.5, 126.7, 125.8, 123.8, 113.9, 98.4, 54.6, 42.4, 20.0, 18.2; IR (film)  $\nu_{\text{max}}$  2923, 1710, 1512, 1385, 1250, 1098, 1029, 887, 850, 804, 788, 696  $\text{cm}^{-1}$ ; HRMS (ESI) calcd for  $\text{C}_{28}\text{H}_{27}\text{N}_2\text{O}_3^+$   $[\text{M}+\text{H}]^+$  439.2016, found 439.2015.

**3-mesityl-6-(3-nitrophenyl)-8-phenyl-1-oxa-2,6-diazaspiro[4.4]nona-2,8-dien-7-one (3aj)**

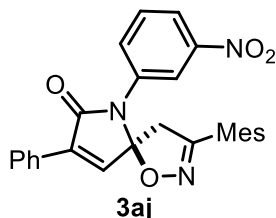

Prepared according to the general procedure (reaction time: 18 h) as described above in 98% yield (40.5 mg). It was purified by flash chromatography (EtOAc : PE = 1:8) to afford a white solid. Melting point: 179 – 181 °C.  $^1\text{H}$  NMR (500 MHz,  $\text{CDCl}_3$ )  $\delta$  8.46 (t,  $J = 2.2$  Hz, 1H), 8.23 (ddd,  $J = 8.4, 2.3, 1.0$  Hz, 1H), 8.05 – 7.91 (m, 3H), 7.65 (t,  $J = 8.2$  Hz, 1H), 7.53 – 7.38 (m, 3H), 7.26 (d,  $J = 1.9$  Hz, 1H), 6.82 (s, 2H), 3.52 (d,  $J = 19.1$  Hz, 1H), 3.22 (d,  $J = 19.1$  Hz, 1H), 2.24 (s, 3H), 1.91 (s, 6H);  $^{13}\text{C}$  NMR (126 MHz,  $\text{CDCl}_3$ )  $\delta$  166.6, 157.6, 147.8, 138.6, 136.6, 135.2, 135.1, 135.0, 132.7, 129.4, 128.9, 128.4, 127.7, 126.7, 123.4, 121.9, 121.7, 98.6, 42.7, 20.0, 18.4; HRMS (ESI) calcd for  $\text{C}_{27}\text{H}_{24}\text{N}_3\text{O}_4^+$   $[\text{M}+\text{H}]^+$  454.1761, found 454.1752.



**4-(3-mesityl-7-oxo-8-phenyl-1-oxa-2,6-diazaspiro[4.4]nona-2,8-dien-6-yl)benzonitrile (3ak)**

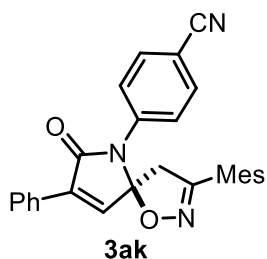

Prepared according to the general procedure (reaction time: 18h) as described above in 78% yield (33.9 mg). It was purified by flash chromatography (EtOAc : PE = 1:7) to afford a white solid. Melting point: 181 – 183 °C. <sup>1</sup>H NMR (500 MHz, CDCl<sub>3</sub>) δ 7.97 – 7.86 (m, 2H), 7.80 – 7.67 (m, 4H), 7.51 – 7.39 (m, 3H), 7.24 (s, 1H), 6.85 (s, 2H), 3.47 (d, *J* = 19.1 Hz, 1H), 3.21 (d, *J* = 19.1 Hz, 1H), 2.27 (s, 3H), 1.97 (s, 6H); <sup>13</sup>C NMR (126 MHz, CDCl<sub>3</sub>) δ 166.5, 157.8, 138.7, 138.3, 136.7, 135.3, 135.1, 132.3, 128.9, 128.4, 127.8, 127.7, 126.7, 126.6, 123.4, 117.2, 110.2, 98.6, 42.7, 20.0, 18.5; HRMS (ESI) calcd for C<sub>28</sub>H<sub>24</sub>N<sub>3</sub>O<sub>2</sub><sup>+</sup> [M+H]<sup>+</sup> 434.1863, found 434.1854.

**6-(3,4-dimethylphenyl)-3-mesityl-8-phenyl-1-oxa-2,6-diazaspiro[4.4]nona-2,8-dien-7-one (3al)**

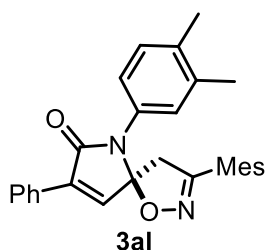

Prepared according to the general procedure (reaction time: 24 h) as described above in 93% yield (40.6 mg). It was purified by flash chromatography (EtOAc : PE = 1:8) to afford a white solid. Melting point: 186 – 188 °C. <sup>1</sup>H NMR (500 MHz, CDCl<sub>3</sub>) δ 8.00 – 7.90 (m, 2H), 7.46 – 7.35 (m, 3H), 7.27 (d, *J* = 2.0 Hz, 1H), 7.24 – 7.16 (m, 3H), 6.80 (s, 2H), 3.45 (d, *J* = 18.9 Hz, 1H), 3.24 (d, *J* = 18.9 Hz, 1H), 2.26 (d, *J* = 5.0 Hz, 6H), 2.24 (s, 3H), 1.84 (s, 6H); <sup>13</sup>C NMR (126 MHz, CDCl<sub>3</sub>) δ 166.9, 156.8, 138.2, 137.0, 136.1, 136.0, 135.6, 135.5, 130.8, 129.7, 129.1, 128.52, 128.49, 127.6, 127.5, 126.7, 125.0, 123.9, 98.5, 42.2, 20.0, 18.7, 18.4, 18.1; IR (film) ν<sub>max</sub> 2922, 1710, 1503, 1450, 1378, 1261, 1093, 1020, 890, 837, 787, 735, 695, 652 cm<sup>-1</sup>; HRMS (ESI) calcd for C<sub>29</sub>H<sub>29</sub>N<sub>2</sub>O<sub>2</sub><sup>+</sup> [M+H]<sup>+</sup> 437.2224, found 437.2221.

**6-(3,4-dichlorophenyl)-3-mesityl-8-phenyl-1-oxa-2,6-diazaspiro[4.4]nona-2,8-dien-7-one (3am)**

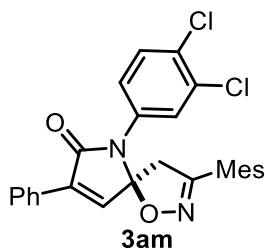

Prepared according to the general procedure (reaction time: 48 h) as described above in 65% yield (31.2 mg). It was purified by flash chromatography (EtOAc : PE = 1:8) to afford a orange solid. Melting point: 236 – 238 °C.  $^1\text{H}$  NMR (500 MHz,  $\text{CDCl}_3$ )  $\delta$  7.94 – 7.89 (m, 2H), 7.71 (d,  $J = 2.3$  Hz, 1H), 7.53 (d,  $J = 8.6$  Hz, 1H), 7.47 – 7.38 (m, 4H), 7.21 (s, 1H), 6.84 (s, 2H), 3.48 (d,  $J = 19.0$  Hz, 1H), 3.20 (d,  $J = 19.0$  Hz, 1H), 2.26 (s, 3H), 1.96 (s, 6H);  $^{13}\text{C}$  NMR (126 MHz,  $\text{CDCl}_3$ )  $\delta$  166.5, 157.4, 138.5, 136.5, 135.4, 135.2, 133.1, 132.5, 131.3, 130.1, 128.8, 128.6, 128.5, 127.7, 126.7, 126.2, 123.5, 98.5, 42.5, 20.0, 18.3; IR (film)  $\nu_{\text{max}}$  2923, 1715, 1476, 1372, 1332, 1262, 1192, 1134, 1032, 887, 852, 814, 787, 747, 695  $\text{cm}^{-1}$ ; HRMS (ESI) calcd for  $\text{C}_{27}\text{H}_{23}\text{Cl}_2\text{N}_2\text{O}_2^+$   $[\text{M}+\text{H}]^+$  477.1131, found 477.1130.

**6-(4-chlorophenyl)-3-mesityl-8-(*o*-tolyl)-1-oxa-2,6-diazaspiro[4.4]nona-2,8-dien-7-one (3an)**

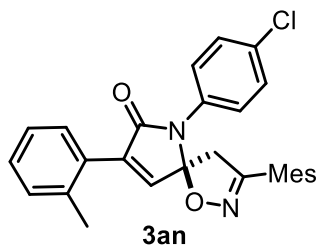

Prepared according to the general procedure (reaction time: 24 h) as described above in 97% yield (44.5 mg). It was purified by flash chromatography (EtOAc : PE = 1:8) to afford a yellow solid. Melting point: 196 – 198 °C.  $^1\text{H}$  NMR (500 MHz,  $\text{CDCl}_3$ )  $\delta$  7.53 – 7.48 (m, 2H), 7.47 – 7.40 (m, 3H), 7.34 – 7.25 (m, 3H), 7.02 (s, 1H), 6.83 (s, 2H), 3.47 (d,  $J = 18.9$  Hz, 1H), 3.23 (d,  $J = 18.9$  Hz, 1H), 2.43 (s, 3H), 2.25 (s, 3H), 1.90 (s, 6H);  $^{13}\text{C}$  NMR (126 MHz,  $\text{CDCl}_3$ )  $\delta$  166.7, 157.3, 139.8, 138.4, 137.4, 135.9, 135.4, 133.0, 132.2, 129.6, 128.9, 128.7, 128.5, 128.2, 127.6, 124.8, 123.6, 98.8, 42.5, 20.0, 19.7, 18.3; IR (film)  $\nu_{\text{max}}$  2958, 2924, 1715, 1493, 1377, 1261, 1090, 1017, 850, 815, 788, 734  $\text{cm}^{-1}$ ; HRMS (ESI) calcd for  $\text{C}_{28}\text{H}_{26}\text{ClN}_2\text{O}_2^+$   $[\text{M}+\text{H}]^+$  457.1677, found 457.1675.

**8-(3-chlorophenyl)-6-(4-chlorophenyl)-3-mesityl-1-oxa-2,6-diazaspiro[4.4]nona-2,8-dien-7-one (3ao)**

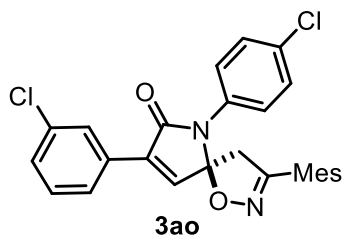

Prepared according to the general procedure (reaction time: 24 h) as described above in 99% yield (47.1 mg). It was purified by flash chromatography (EtOAc : PE = 1:8) to afford a white solid. Melting point: 194 – 196 °C. <sup>1</sup>H NMR (500 MHz, CDCl<sub>3</sub>) δ 7.93 (d, *J* = 2.0 Hz, 1H), 7.84 (dt, *J* = 6.9, 1.8 Hz, 1H), 7.48 – 7.42 (m, 4H), 7.40 – 7.33 (m, 2H), 7.24 (s, 1H), 6.82 (s, 2H), 3.48 (d, *J* = 19.0 Hz, 1H), 3.20 (d, *J* = 18.9 Hz, 1H), 2.25 (s, 3H), 1.89 (s, 6H); <sup>13</sup>C NMR (126 MHz, CDCl<sub>3</sub>) δ 166.1, 157.2, 138.5, 137.3, 135.4, 134.1, 133.6, 133.3, 131.8, 130.4, 128.9, 128.8, 128.7, 128.6, 127.6, 126.7, 124.8, 123.4, 98.3, 42.5, 20.0, 18.2; IR (film)  $\nu_{\max}$  2922, 1712, 1493, 1379, 1331, 1194, 1090, 885, 854, 821, 792, 735, 719 cm<sup>-1</sup>; HRMS (ESI) calcd for C<sub>27</sub>H<sub>23</sub>Cl<sub>2</sub>N<sub>2</sub>O<sub>2</sub><sup>+</sup> [M+H]<sup>+</sup> 477.1131, found 477.1127.

**6-(4-chlorophenyl)-3-mesityl-8-(*p*-tolyl)-1-oxa-2,6-diazaspiro[4.4]nona-2,8-dien-7-one (3ap)**

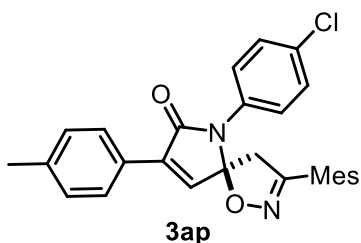

Prepared according to the general procedure (reaction time: 24 h) as described above in 91% yield (41.1 mg). It was purified by flash chromatography (EtOAc : PE = 1:8) to afford a orange solid. Melting point: 180 – 182 °C. <sup>1</sup>H NMR (500 MHz, CDCl<sub>3</sub>) <sup>1</sup>H NMR (500 MHz, Chloroform-d) δ 7.84 (d, *J* = 8.0 Hz, 2H), 7.50 – 7.46 (m, 2H), 7.44 – 7.39 (m, 2H), 7.25 (d, *J* = 1.6 Hz, 2H), 7.16 (s, 1H), 6.82 (s, 2H), 3.45 (d, *J* = 19.0 Hz, 1H), 3.18 (d, *J* = 19.0 Hz, 1H), 2.39 (s, 3H), 2.25 (s, 3H), 1.89 (s, 6H); <sup>13</sup>C NMR (126 MHz, CDCl<sub>3</sub>) δ 166.8, 157.2, 138.9, 138.4, 135.4, 135.3, 135.2, 133.1, 132.1, 128.71, 128.66, 128.4, 127.6, 126.6, 126.0, 123.6, 98.5, 42.5, 20.4, 20.0, 18.2; IR (film)  $\nu_{\max}$  2922, 1714, 1493, 1378, 1332, 1262, 1184, 1091, 1018, 886, 848, 818, 762, 734 cm<sup>-1</sup>; HRMS (ESI) calcd for C<sub>28</sub>H<sub>26</sub>ClN<sub>2</sub>O<sub>2</sub><sup>+</sup> [M+H]<sup>+</sup> 457.1677, found 457.1675.

**6-(4-chlorophenyl)-8-cyclohexyl-3-mesityl-1-oxa-2,6-diazaspiro[4.4]nona-2,8-dien-7-one**

**(3aq)**

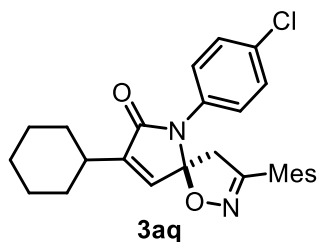

Prepared according to the general procedure (reaction time: 48 h) as described above in 56% yield (25.2 mg). It was purified by flash chromatography (EtOAc : PE = 1:12) to afford a oil.  $^1\text{H}$  NMR (500 MHz,  $\text{CDCl}_3$ )  $\delta$  7.47 – 7.35 (m, 4H), 6.81 (s, 2H), 6.63 (d,  $J = 1.4$  Hz, 1H), 3.34 (d,  $J = 18.9$  Hz, 1H), 3.11 (d,  $J = 18.9$  Hz, 1H), 2.48 (ttd,  $J = 11.6, 3.4, 1.4$  Hz, 1H), 2.24 (s, 3H), 2.07 – 1.99 (m, 2H), 1.88 (s, 6H), 1.82 (dt,  $J = 12.8, 3.5$  Hz, 2H), 1.40 (qt,  $J = 12.8, 3.4$  Hz, 2H), 1.26 (dddt,  $J = 19.9, 12.8, 10.1, 3.3$  Hz, 4H);  $^{13}\text{C}$  NMR (126 MHz,  $\text{CDCl}_3$ )  $\delta$  167.7, 157.2, 144.3, 138.3, 135.4, 135.3, 132.8, 132.3, 128.6, 128.3, 127.6, 123.8, 99.2, 42.3, 33.7, 30.6, 30.5, 25.1, 25.0, 20.0, 18.3; HRMS (ESI) calcd for  $\text{C}_{27}\text{H}_{30}\text{ClN}_2\text{O}_2^+$   $[\text{M}+\text{H}]^+$  449.1990, found 449.1989.

**6-(4-chlorophenyl)-3-(2,6-dichlorophenyl)-8-phenyl-1-oxa-2,6-diazaspiro[4.4]nona-2,8-dien-7-one (3ba)**

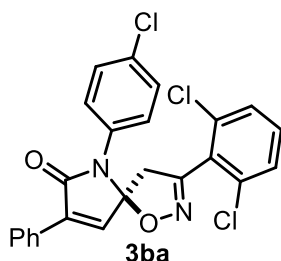

Prepared according to the general procedure (reaction time: 48 h) as described above in 77% yield (36.1 mg). It was purified by flash chromatography (EtOAc : PE=1:8) to afford a brown solid. Melting point: 199 – 201 °C.  $^1\text{H}$  NMR (500 MHz,  $\text{CDCl}_3$ )  $\delta$  7.99 – 7.88 (m, 2H), 7.52 – 7.46 (m, 2H), 7.46 – 7.39 (m, 5H), 7.33 – 7.23 (m, 4H), 3.58 (d,  $J = 18.7$  Hz, 1H), 3.34 (d,  $J = 18.7$  Hz, 1H);  $^{13}\text{C}$  NMR (126 MHz,  $\text{CDCl}_3$ )  $\delta$  166.7, 153.6, 136.0, 135.4, 133.9, 132.8, 132.0, 130.5, 128.8, 128.7, 128.6, 128.3, 127.7, 127.2, 126.8, 126.3, 99.5, 40.5; IR (film)  $\nu_{\text{max}}$  2923, 1715, 1493, 1377, 1330, 1264, 1194, 1089, 895, 785, 732, 701, 647  $\text{cm}^{-1}$ ; HRMS (ESI) calcd for  $\text{C}_{24}\text{H}_{16}\text{Cl}_3\text{N}_2\text{O}_2^+$   $[\text{M}+\text{H}]^+$  469.0272, found 469.0268.

**6-(4-chlorophenyl)-3-(2,6-dibromophenyl)-8-phenyl-1-oxa-2,6-diazaspiro[4.4]nona-2,8-dien-7-one (3ca)**

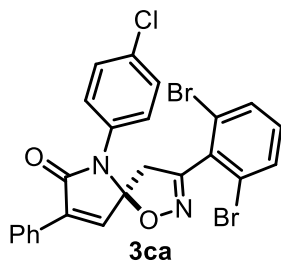

Prepared according to the general procedure (reaction time: 48 h) as described above in 90% yield (50.0 mg). It was purified by flash chromatography (EtOAc : PE=1:8) to afford a brown solid. Melting point: 205 – 207 °C.  $^1\text{H}$  NMR (500 MHz,  $\text{CDCl}_3$ )  $\delta$  7.98 – 7.90 (m, 2H), 7.56 – 7.49 (m, 4H), 7.47 – 7.38 (m, 5H), 7.26 (s, 1H), 7.13 (t,  $J = 8.1$  Hz, 1H), 3.54 (d,  $J = 18.6$  Hz, 1H), 3.39 (d,  $J = 18.6$  Hz, 1H);  $^{13}\text{C}$  NMR (126 MHz,  $\text{CDCl}_3$ )  $\delta$  166.8, 156.5, 136.2, 135.1, 132.8, 132.0, 131.2, 130.9, 129.9, 128.8, 128.7, 128.6, 127.7, 126.8, 122.7, 99.7, 40.0; IR (film)  $\nu_{\text{max}}$  2924, 1717, 1493, 1381, 1260, 1091, 1016, 794, 729, 695  $\text{cm}^{-1}$ ; HRMS (ESI) calcd for  $\text{C}_{24}\text{H}_{16}\text{Br}_2\text{ClN}_2\text{O}_2^+$   $[\text{M}+\text{H}]^+$  556.9262, found 556.9260.

**6-(4-chlorophenyl)-3-(2,6-dimethoxyphenyl)-8-phenyl-1-oxa-2,6-diazaspiro[4.4]nona-2,8-dien-7-one (3da)**

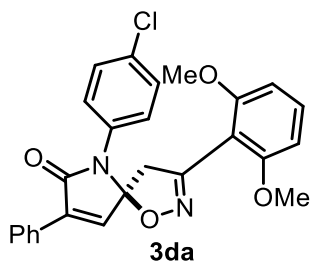

Prepared according to the general procedure (reaction time: 48 h) as described above in 78% yield (36.0 mg). It was purified by flash chromatography (EtOAc : PE = 1:5) to afford a white solid. Melting point: 202 – 204 °C.  $^1\text{H}$  NMR (500 MHz,  $\text{CDCl}_3$ )  $\delta$  7.95 – 7.90 (m, 2H), 7.51 – 7.46 (m, 2H), 7.44 – 7.35 (m, 5H), 7.28 – 7.22 (m, 2H), 6.51 (d,  $J = 8.4$  Hz, 2H), 3.67 (s, 6H), 3.63 (s, 1H), 3.28 (d,  $J = 18.5$  Hz, 1H);  $^{13}\text{C}$  NMR (126 MHz,  $\text{CDCl}_3$ )  $\delta$  166.8, 157.5, 152.6, 136.9, 135.3, 132.5, 132.0, 130.5, 129.1, 128.5, 128.2, 127.7, 127.6, 126.7, 105.0, 102.8, 98.4, 54.8, 42.0; IR (film)  $\nu_{\text{max}}$  2932, 1712, 1593, 1493, 1473, 1376, 1256, 1112, 1017, 788, 734  $\text{cm}^{-1}$ ; HRMS (ESI) calcd for  $\text{C}_{26}\text{H}_{22}\text{ClN}_2\text{O}_4^+$   $[\text{M}+\text{H}]^+$  461.1262, found 461.1260.

**6-(4-chlorophenyl)-3,8-diphenyl-1-oxa-2,6-diazaspiro[4.4]nona-2,8-dien-7-one (3ea)**

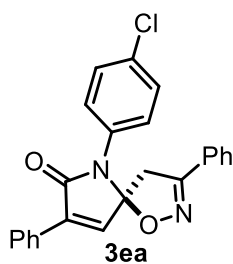

Prepared according to the general procedure (reaction time: 48 h) as described above in 79% yield (31.5 mg). It was purified by flash chromatography (EtOAc : PE = 1:5) to afford a yellow solid. Melting point: 170 – 172 °C.  $^1\text{H}$  NMR (500 MHz,  $\text{CDCl}_3$ )  $\delta$  7.97 – 7.87 (m, 2H), 7.57 – 7.49 (m, 2H), 7.48 – 7.31 (m, 10H), 7.20 (s, 1H), 3.66 (d,  $J = 18.0$  Hz, 1H), 3.37 (d,  $J = 18.0$  Hz, 1H);  $^{13}\text{C}$  NMR (126 MHz,  $\text{CDCl}_3$ )  $\delta$  166.7, 156.5, 136.1, 135.6, 132.5, 132.1, 129.8, 128.8, 128.74, 128.6, 127.9, 127.7, 127.3, 127.2, 126.7, 125.6, 99.2, 38.8; HRMS (ESI) calcd for  $\text{C}_{24}\text{H}_{18}\text{ClN}_2\text{O}_2^+$   $[\text{M}+\text{H}]^+$  401.1051, found 401.1046.

**1-(4-chlorophenyl)-3,6,8-triphenyl-1,7,8-triazaspiro[4.4]nona-3,6-dien-2-one (5aa)**

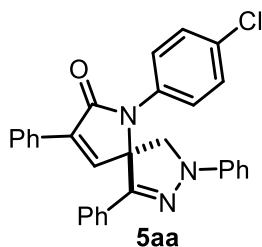

Prepared according to the general procedure (reaction time: 12 h) as described above in 75% yield (35.9 mg). It was purified by flash chromatography (EtOAc : PE = 1:15) to afford a yellow solid. Melting point: 58 – 60 °C.  $^1\text{H}$  NMR (500 MHz,  $\text{CDCl}_3$ )  $\delta$  7.85 – 7.79 (m, 2H), 7.57 – 7.51 (m, 2H), 7.40 – 7.34 (m, 3H), 7.34 – 7.25 (m, 5H), 7.22 – 7.16 (m, 6H), 7.12 (s, 1H), 6.89 (tt,  $J = 6.9$ , 1.6 Hz, 1H), 3.64 (d,  $J = 18.0$  Hz, 1H), 3.42 (d,  $J = 18.0$  Hz, 1H);  $^{13}\text{C}$  NMR (126 MHz,  $\text{CDCl}_3$ )  $\delta$  166.7, 146.2, 142.3, 139.3, 135.7, 132.8, 131.9, 130.5, 128.9, 128.6, 128.5, 128.31, 128.26, 127.70, 127.67, 126.59, 126.55, 124.6, 120.9, 114.8, 86.2, 41.4; IR (film)  $\nu_{\text{max}}$  1706, 1493, 1275, 1260, 764, 750, 713, 691, 417  $\text{cm}^{-1}$ ; HRMS (ESI) calcd for  $\text{C}_{30}\text{H}_{23}\text{ClN}_3\text{O}^+$   $[\text{M}+\text{H}]^+$  476.1524, found 476.1518.

**1-(4-chlorophenyl)-6-(4-methoxyphenyl)-3,8-diphenyl-1,7,8-triazaspiro[4.4]nona-3,6-dien-2-one (5ba)**

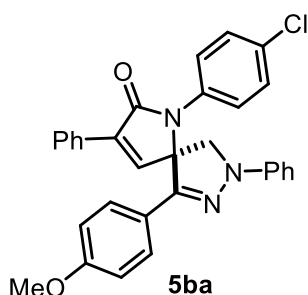

Prepared according to the general procedure (reaction time: 12 h) as described above in 92% yield (46.4 mg). It was purified by flash chromatography (EtOAc : PE = 1:8) to afford a yellow solid. Melting point: 70 – 72 °C. <sup>1</sup>H NMR (500 MHz, CDCl<sub>3</sub>) δ 7.87 (dd, *J* = 7.6, 2.2 Hz, 2H), 7.53 (dd, *J* = 8.9, 2.2 Hz, 2H), 7.44 – 7.37 (m, 3H), 7.35 – 7.29 (m, 2H), 7.26 – 7.19 (m, 6H), 7.15 (d, *J* = 2.1 Hz, 1H), 6.94 – 6.86 (m, 3H), 3.81 (s, 3H), 3.64 (dd, *J* = 18.0, 2.2 Hz, 1H), 3.43 (dd, *J* = 18.0, 2.1 Hz, 1H); <sup>13</sup>C NMR (126 MHz, CDCl<sub>3</sub>) δ 166.7, 159.6, 146.2, 142.5, 139.5, 135.6, 132.9, 131.8, 129.0, 128.54, 128.47, 128.2, 127.7, 126.6, 126.5, 126.1, 123.2, 120.6, 114.7, 113.1, 86.1, 54.3, 41.6; IR (film)  $\nu_{\max}$  2171, 1978, 1275, 1261, 764, 749, 696, 529, 422, 411 cm<sup>-1</sup>; HRMS (ESI) calcd for C<sub>31</sub>H<sub>27</sub>ClN<sub>3</sub>O<sup>+</sup> [M+H]<sup>+</sup> 506.1630, found 581.1625.

**1'-(4-chlorophenyl)-4'-phenyl-3-tosyl-1,10b-dihydro-3H-spiro[pyrazolo[1,5-c]quina-zoline-2,2'-pyrrol]-5'(1'H)-one (7aa)**

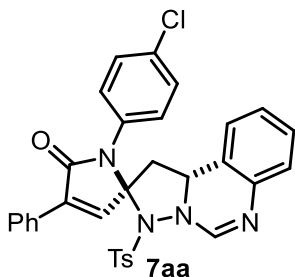

Prepared according to the general procedure (reaction time: 24 h) as described above in 93% yield (54.0 mg). It was purified by flash chromatography (EtOAc : PE = 1:3) to afford a red-brown solid. Melting point: 146 – 148 °C. <sup>1</sup>H NMR (500 MHz, CDCl<sub>3</sub>) δ 8.03 – 7.94 (m, 2H), 7.85 – 7.78 (m, 2H), 7.54 – 7.42 (m, 5H), 7.38 – 7.32 (m, 5H), 7.27 (td, *J* = 7.6, 1.4 Hz, 1H), 7.18 – 7.07 (m, 2H), 6.93 (dd, *J* = 7.9, 1.5 Hz, 1H), 6.31 (s, 1H), 4.73 (dd, *J* = 12.3, 4.7 Hz, 1H), 2.87 (t, *J* = 12.5 Hz, 1H), 2.47 (s, 3H), 2.44 (dd, *J* = 12.7, 4.7 Hz, 1H); <sup>13</sup>C NMR (126 MHz, CDCl<sub>3</sub>) δ 168.5, 151.6, 145.8, 137.6, 136.3, 135.7, 135.3, 134.5, 132.4, 131.5, 130.1, 130.0, 129.9, 129.8, 129.7, 128.9, 128.7, 127.6, 127.0, 126.8, 126.2, 122.2, 84.2, 58.0, 43.6, 21.8; IR (film)  $\nu_{\max}$  2923, 1711, 1493, 1378, 1260, 1163, 1121, 1090, 1032, 1009, 788, 736, 683, 567 cm<sup>-1</sup>; HRMS (ESI) calcd for C<sub>32</sub>H<sub>26</sub>ClN<sub>4</sub>O<sub>3</sub>S<sup>+</sup> [M+H]<sup>+</sup> 581.1409, found 581.1405.

**1'-(4-chlorophenyl)-9-fluoro-4'-phenyl-3-tosyl-1,10b-dihydro-3H-spiro [pyrazolo[1,5-c]quinazoline-2,2'-pyrrol]-5'(1'H)-one (7ba)**

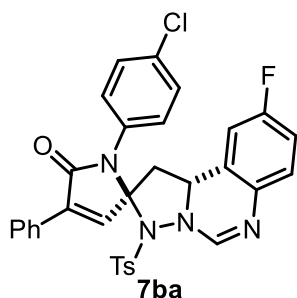

Prepared according to the general procedure (reaction time: 30 h) as described above in 98% yield (59.0 mg). It was purified by flash chromatography (EtOAc : PE = 1:3) to afford an orange solid. Melting point: 193 – 195 °C. <sup>1</sup>H NMR (500 MHz, CDCl<sub>3</sub>) δ 8.03 – 7.90 (m, 2H), 7.82 – 7.78 (m, 2H), 7.52 – 7.40 (m, 5H), 7.34 (ddd, *J* = 8.9, 4.5, 2.0 Hz, 5H), 7.10 (dd, *J* = 8.7, 5.2 Hz, 1H), 6.94 (td, *J* = 8.4, 2.8 Hz, 1H), 6.65 (dd, *J* = 8.1, 2.8 Hz, 1H), 6.26 (s, 1H), 4.69 (dd, *J* = 12.3, 4.7 Hz, 1H), 2.85 (t, *J* = 12.5 Hz, 1H), 2.47 (s, 3H), 2.44 (t, 1H); <sup>13</sup>C NMR (126 MHz, CDCl<sub>3</sub>) δ 167.4, 160.8, 158.8, 149.77, 149.75, 144.9, 135.3, 134.5, 134.3, 133.3, 133.0, 132.9, 131.3, 130.5, 129.1, 129.0, 128.8, 128.7, 127.8, 127.7, 127.6, 127.5, 126.6, 123.0, 122.9, 115.5, 115.3, 112.2, 112.0, 83.1, 56.8, 42.3, 20.8; IR (film)  $\nu_{\max}$  2924, 1687, 1494, 1378, 1165, 1122, 1091, 1033, 1010, 815 cm<sup>-1</sup>; HRMS (ESI) calcd for C<sub>32</sub>H<sub>25</sub>ClFN<sub>4</sub>O<sub>3</sub>S<sup>+</sup> [M+H]<sup>+</sup> 599.1314, found 599.1310.

**8-chloro-1'-(4-chlorophenyl)-4'-phenyl-3-tosyl-1,10b-dihydro-3H-spiro[pyrazolo[1,5-c]quinazoline-2,2'-pyrrol]-5'(1'H)-one (7ca)**

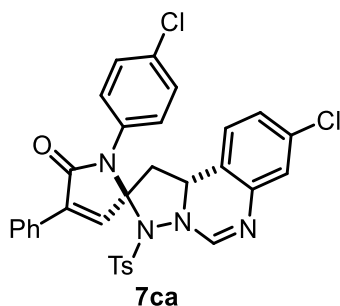

Prepared according to the general procedure (reaction time: 24 h) as described above in 96% yield (59.0 mg). It was purified by flash chromatography (EtOAc : PE = 1:3) to afford an orange solid. Melting point: 158 – 160 °C. <sup>1</sup>H NMR (500 MHz, CDCl<sub>3</sub>) δ 8.00 – 7.91 (m, 2H), 7.84 – 7.74 (m, 2H), 7.49 – 7.41 (m, 5H), 7.37 – 7.30 (m, 5H), 7.16 – 7.02 (m, 2H), 6.85 (d, *J* = 8.1 Hz, 1H), 6.28 (s, 1H), 4.73 (dd, *J* = 12.3, 4.7 Hz, 1H), 2.82 (t, *J* = 12.5 Hz, 1H), 2.46 (s, 3H), 2.44 (t, 1H); <sup>13</sup>C NMR (126 MHz, CDCl<sub>3</sub>) δ 167.4, 151.3, 145.0, 135.3, 134.5, 134.3, 134.3, 133.1, 131.3, 130.4, 129.2, 129.1, 128.8, 128.7, 127.8, 127.7, 126.6, 126.2, 125.9, 119.5, 83.13, 56.6, 42.6, 20.8; IR (film)  $\nu_{\max}$  2923, 1701, 1644, 1492, 1163, 1121, 1089, 1032, 1010, 812, 683, 566 cm<sup>-1</sup>; HRMS (ESI) calcd for C<sub>32</sub>H<sub>25</sub>Cl<sub>2</sub>N<sub>4</sub>O<sub>3</sub>S<sup>+</sup> [M+H]<sup>+</sup> 615.1019, found 615.1016.



**1'-(4-chlorophenyl)-10-methyl-4'-phenyl-3-tosyl-1,10b-dihydro-3H-spiro[pyrazolo [1,5-c]quinazoline-2,2'-pyrrol]-5'(1'H)-one (7da)**

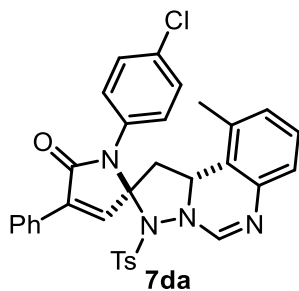

Prepared according to the general procedure (reaction time: 48 h) as described above in 58% yield (34.6 mg). It was purified by flash chromatography (EtOAc : PE = 1:3) to afford a brown solid. Melting point: 180 – 182 °C. <sup>1</sup>H NMR (500 MHz, CDCl<sub>3</sub>) δ 8.03 – 7.93 (m, 2H), 7.86 – 7.77 (m, 2H), 7.53 – 7.41 (m, 5H), 7.36 – 7.31 (m, 5H), 7.05 (q, *J* = 8.9, 8.0 Hz, 2H), 6.75 (s, 1H), 6.29 (s, 1H), 4.73 – 4.64 (m, 1H), 2.84 (t, *J* = 12.6 Hz, 1H), 2.47 (s, 3H), 2.42 (dd, *J* = 12.8, 4.6 Hz, 1H), 2.29 (s, 3H); <sup>13</sup>C NMR (126 MHz, CDCl<sub>3</sub>) δ 168.5, 150.8, 145.8, 137.1, 136.3, 135.7, 135.3, 134.5, 132.4, 131.5, 130.4, 130.1, 130.0, 130.0, 129.7, 128.9, 128.7, 127.6, 126.8, 84.3, 58.1, 43.6, 21.8, 21.1; IR (film)  $\nu_{\max}$  2924, 1688, 1493, 1379, 1166, 1122, 1090, 1033, 1011, 814, 790, 683, 568 cm<sup>-1</sup>; HRMS (ESI) calcd for C<sub>33</sub>H<sub>28</sub>ClN<sub>4</sub>O<sub>3</sub>S<sup>+</sup> [M+H]<sup>+</sup> 595.1565, found 595.1561.

**1'-(4-chlorophenyl)-9-methoxy-4'-phenyl-3-tosyl-1,10b-dihydro-3H-spiro[pyrazolo [1,5-c]quinazoline-2,2'-pyrrol]-5'(1'H)-one (7ea)**

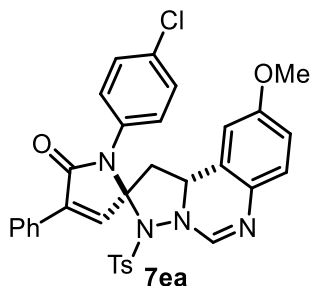

Prepared according to the general procedure (reaction time: 24 h) as described above in 80% yield (48.8 mg). It was purified by flash chromatography (EtOAc : PE = 1:2) to afford an orange solid. Melting point: 168 – 170 °C. <sup>1</sup>H NMR (500 MHz, CDCl<sub>3</sub>) δ 8.01 – 7.95 (m, 2H), 7.84 – 7.76 (m, 2H), 7.49 – 7.39 (m, 5H), 7.34 (ddd, *J* = 8.1, 4.4, 2.4 Hz, 5H), 7.08 (d, *J* = 8.6 Hz, 1H), 6.77 (dd, *J* = 8.7, 2.8 Hz, 1H), 6.46 (d, *J* = 2.7 Hz, 1H), 6.23 (s, 1H), 4.66 (dd, *J* = 12.3, 4.6 Hz, 1H), 3.76 (s, 3H), 2.82 (t, *J* = 12.5 Hz, 1H), 2.46 (s, 3H), 2.43 (dd, *J* = 12.7, 4.7 Hz, 1H); <sup>13</sup>C NMR (126 MHz, CDCl<sub>3</sub>) δ 167.5, 157.3, 148.6, 144.7, 135.2, 134.8, 134.2, 133.5, 131.4, 130.5, 130.0, 129.03, 129.00, 128.9, 128.7, 127.8, 127.7, 127.0, 126.6, 122.5, 113.1, 111.0, 83.4, 57.2, 54.5, 42.4, 20.8; IR (film)  $\nu_{\max}$  2924, 1686, 1493, 1378, 1260, 1216, 1165, 1121, 1090, 1033, 1011, 813, 567 cm<sup>-1</sup>; HRMS (ESI) calcd for C<sub>33</sub>H<sub>28</sub>ClN<sub>4</sub>O<sub>4</sub>S<sup>+</sup> [M+H]<sup>+</sup> 611.1514, found 611.1512.

**1'-(4-chlorophenyl)-8-methoxy-4'-phenyl-3-tosyl-1,10b-dihydro-3H-spiro[pyrazolo [1,5-c]quinazoline-2,2'-pyrrol]-5'(1'H)-one (7fa)**

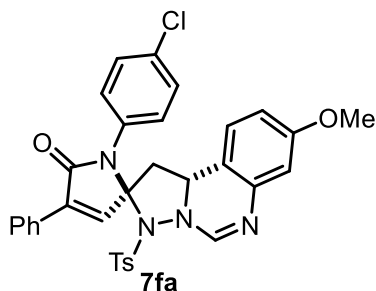

Prepared according to the general procedure (reaction time: 48 h) as described above in 50% yield (30.7 mg). It was purified by flash chromatography (EtOAc : PE = 1:2) to afford a yellow solid. Melting point: 140 – 142 °C. <sup>1</sup>H NMR (500 MHz, CDCl<sub>3</sub>) δ 8.00 – 7.94 (m, 2H), 7.83 – 7.78 (m, 2H), 7.50 – 7.41 (m, 5H), 7.34 (dd, *J* = 8.6, 2.3 Hz, 4H), 7.30 (s, 1H), 6.83 (d, *J* = 8.2 Hz, 1H), 6.71 – 6.63 (m, 2H), 6.34 (s, 1H), 4.67 (dd, *J* = 12.2, 4.6 Hz, 1H), 3.76 (s, 3H), 2.80 (t, *J* = 12.5 Hz, 1H), 2.47 (s, 3H), 2.39 (dd, *J* = 12.7, 4.7 Hz, 1H); <sup>13</sup>C NMR (126 MHz, CDCl<sub>3</sub>) δ 167.4, 159.7, 151.0, 144.7, 137.7, 135.2, 134.7, 134.2, 133.5, 131.4, 130.5, 129.1, 129.0, 128.9, 128.7, 127.8, 127.7, 126.6, 125.9, 113.1, 112.2, 110.5, 83.3, 56.8, 54.4, 42.6, 20.8; IR (film)  $\nu_{\max}$  2925, 1698, 1614, 1494, 1451, 1379, 1293, 1213, 1167, 1123, 1090, 1033, 1011, 815 cm<sup>-1</sup>; HRMS (ESI) C<sub>33</sub>H<sub>28</sub>ClN<sub>4</sub>O<sub>4</sub>S<sup>+</sup> [M+H]<sup>+</sup> 611.1514, found 611.1512.

**3-((4-(*tert*-butyl)phenyl)sulfonyl)-1'-(4-chlorophenyl)-4'-phenyl-1,10b-dihydro-3H-spiro[pyrazolo[1,5-c]quinazoline-2,2'-pyrrol]-5'(1'H)-one (7ga)**

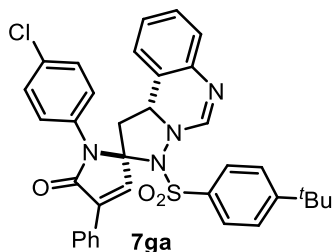

Prepared according to the general procedure (reaction time: 24 h) as described above in 86% yield (53.5 mg). It was purified by flash chromatography (EtOAc : PE = 1:5) to afford a yellow solid. Melting point: 190 – 192 °C. <sup>1</sup>H NMR (500 MHz, CDCl<sub>3</sub>) δ 8.01 – 7.93 (m, 2H), 7.88 – 7.81 (m, 2H), 7.58 – 7.52 (m, 2H), 7.49 – 7.41 (m, 5H), 7.38 – 7.32 (m, 3H), 7.28 (dd, *J* = 7.5, 1.4 Hz, 1H), 7.13 (dd, *J* = 8.0, 6.9 Hz, 2H), 6.98 – 6.92 (m, 1H), 6.38 (s, 1H), 4.78 (dd, *J* = 12.4, 4.7 Hz, 1H), 2.87 (t, *J* = 12.6 Hz, 1H), 2.45 (dd, *J* = 12.8, 4.7 Hz, 1H), 1.36 (s, 9H); <sup>13</sup>C NMR (126 MHz, CDCl<sub>3</sub>) δ 167.4, 157.7, 150.6, 135.1, 134.8, 134.2, 133.4, 131.4, 130.5, 129.1, 128.9, 128.8, 128.7, 127.7, 126.6, 126.0, 125.6, 125.5, 125.2, 121.2, 83.2, 57.1, 42.5, 34.4, 30.0; IR (film)  $\nu_{\max}$  2960, 2924, 1695, 1494, 1377, 1261, 1169, 1092, 1017, 797, 755, 421 cm<sup>-1</sup>; HRMS (ESI) C<sub>35</sub>H<sub>32</sub>ClN<sub>4</sub>O<sub>3</sub>S<sup>+</sup> [M+H]<sup>+</sup> 623.1878, found 623.1874.

**1'-(4-chlorophenyl)-3-(mesitylsulfonyl)-4'-phenyl-1,10b-dihydro-3H-spiro[pyrazolo [1,5-c]quinazoline-2,2'-pyrrol]-5'(1'H)-one (7ha)**

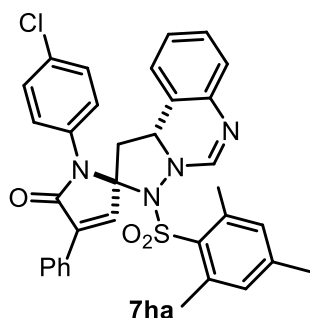

Prepared according to the general procedure (reaction time: 42 h) as described above in 99% yield (60.2 mg). It was purified by flash chromatography (EtOAc : PE = 1:3) to afford a yellow solid. Melting point: 178 – 180 °C. <sup>1</sup>H NMR (500 MHz, CDCl<sub>3</sub>) δ 8.04 – 7.97 (m, 2H), 7.91 (s, 1H), 7.48 – 7.38 (m, 3H), 7.37 – 7.32 (m, 2H), 7.31 – 7.26 (m, 2H), 7.23 (dd, *J* = 7.6, 1.5 Hz, 1H), 7.13 (td, *J* = 7.5, 1.3 Hz, 1H), 7.05 (dd, *J* = 7.8, 1.3 Hz, 1H), 7.01 – 6.95 (m, 3H), 5.88 (s, 1H), 5.33 (dd, *J* = 11.4, 5.8 Hz, 1H), 2.92 (dd, *J* = 13.0, 11.4 Hz, 1H), 2.74 (dd, *J* = 13.0, 5.9 Hz, 1H), 2.63 (s, 6H), 2.30 (s, 3H); <sup>13</sup>C NMR (126 MHz, CDCl<sub>3</sub>) δ 167.7, 148.3, 143.7, 136.7, 136.5, 133.9, 133.5, 132.1, 131.4, 129.3, 129.1, 129.0, 128.9, 128.5, 128.4, 127.6, 126.8, 125.9, 125.7, 125.3, 121.4, 84.3, 57.1, 44.0, 22.2, 20.1; IR (film)  $\nu_{\max}$  2922, 1732, 1696, 1523, 1496, 1454, 1262, 1089, 750, 451 cm<sup>-1</sup>; HRMS (ESI) calcd for C<sub>34</sub>H<sub>30</sub>ClN<sub>4</sub>O<sub>3</sub>S<sup>+</sup> [M+H]<sup>+</sup> 609.1722, found 609.1719.

**1'-(4-chlorophenyl)-3-((4-methoxyphenyl)sulfonyl)-4'-phenyl-1,10b-dihydro-3H-spiro[pyrazolo[1,5-c]quinazoline-2,2'-pyrrol]-5'(1'H)-one (7ia)**

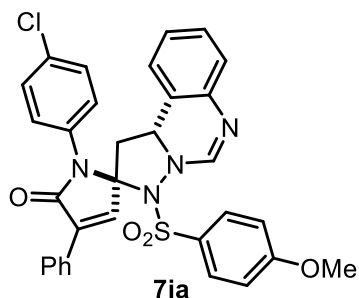

Prepared according to the general procedure (reaction time: 48 h) as described above in 99% yield (58.9 mg). It was purified by flash chromatography (EtOAc : PE=1:2) to afford a brown solid. Melting point: 151 – 153 °C. <sup>1</sup>H NMR (500 MHz, CDCl<sub>3</sub>) δ 8.00 – 7.93 (m, 2H), 7.87 – 7.80 (m, 2H), 7.48 – 7.39 (m, 5H), 7.37 – 7.29 (m, 3H), 7.27 (dd, *J* = 7.7, 1.4 Hz, 1H), 7.20 – 7.10 (m, 2H), 7.01 – 6.95 (m, 2H), 6.93 (dd, *J* = 7.6, 1.4 Hz, 1H), 6.44 (s, 1H), 4.79 (dd, *J* = 12.3, 4.8 Hz, 1H), 3.88 (s, 3H), 2.85 (t, *J* = 12.5 Hz, 1H), 2.48 (dd, *J* = 12.8, 4.8 Hz, 1H); <sup>13</sup>C NMR (126 MHz, CDCl<sub>3</sub>) δ 167.5, 163.3, 150.6, 136.6, 135.2, 134.9, 134.2, 131.4, 130.5, 130.1, 129.0, 128.9, 128.8, 128.7, 127.7, 127.6, 126.6, 126.0, 125.7, 125.2, 121.2, 113.6, 83.1, 57.0, 54.8, 42.5; IR (film)  $\nu_{\max}$  2960, 2924, 1696, 1593, 1495, 1260, 1160, 1091, 1024, 799, 421 cm<sup>-1</sup>; HRMS (ESI) calcd for C<sub>32</sub>H<sub>26</sub>ClN<sub>4</sub>O<sub>4</sub>S<sup>+</sup> [M+H]<sup>+</sup> 597.1358, found 597.1354.

**3-benzoyl-1'-(4-chlorophenyl)-4'-phenyl-1,5,6,10b-tetrahydro-3H-spiro[pyrazolo[5,1-a]isoquinoline-2,2'-pyrrol]-5'(1'H)-one (7ja)**

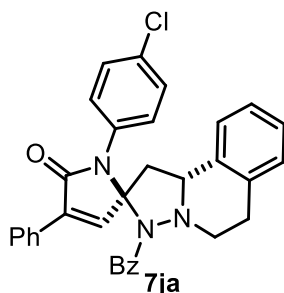

Prepared according to the general procedure (reaction time: 6 h) as described above in 95% yield (50.6 mg). It was purified by flash chromatography (EtOAc : PE=1:5) to afford a yellow solid. Melting point: 218 – 220 °C. <sup>1</sup>H NMR (500 MHz, CDCl<sub>3</sub>) δ 7.98 – 7.92 (m, 2H), 7.81 – 7.74 (m, 2H), 7.50 – 7.29 (m, 10H), 7.21 – 7.13 (m, 3H), 7.08 – 7.02 (m, 1H), 6.96 – 6.90 (m, 1H), 4.13 (dd, *J* = 11.9, 6.0 Hz, 1H), 2.98 (ddd, *J* = 12.7, 9.9, 3.1 Hz, 1H), 2.93 – 2.85 (m, 2H), 2.83 – 2.76 (m, 1H), 2.76 – 2.69 (m, 1H), 2.54 (dt, *J* = 16.4, 2.7 Hz, 1H); <sup>13</sup>C NMR (126 MHz, CDCl<sub>3</sub>) δ 167.7, 165.6, 140.9, 135.0, 133.9, 133.8, 133.2, 132.6, 131.5, 130.1, 129.9, 129.6, 129.0, 128.0, 127.8, 127.6, 127.5, 126.7, 126.6, 126.3, 125.9, 125.5, 82.8, 58.5, 48.4, 41.9, 28.1; IR (film)  $\nu_{\max}$  2960, 2925, 1702, 1644, 1493, 1383, 1261, 1089, 1016, 788, 765, 735, 695 cm<sup>-1</sup>; HRMS (ESI) calcd for C<sub>33</sub>H<sub>27</sub>ClN<sub>3</sub>O<sub>2</sub><sup>+</sup> [M+H]<sup>+</sup> 532.1786, found 532.1789.

**3-benzoyl-7-chloro-1'-(4-chlorophenyl)-4'-phenyl-1,5,6,10b-tetrahydro-3H-spiro[pyrazolo[5,1-a]isoquinoline-2,2'-pyrrol]-5'(1'H)-one (7ka)**

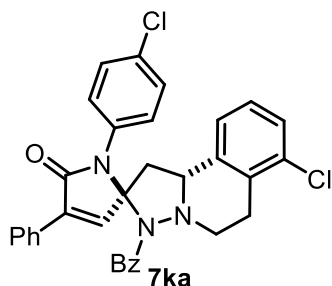

Prepared according to the general procedure (reaction time: 6 h) as described above in 63% yield (35.5 mg). It was purified by flash chromatography (EtOAc : PE=1:5) to afford a yellow solid. Melting point: 220 – 222 °C. <sup>1</sup>H NMR (500 MHz, CDCl<sub>3</sub>) δ 7.98 – 7.92 (m, 2H), 7.79 – 7.73 (m, 2H), 7.50 – 7.29 (m, 10H), 7.25 – 7.22 (m, 1H), 7.19 – 7.10 (m, 2H), 6.84 (d, *J* = 7.7 Hz, 1H), 4.10 (dd, *J* = 11.9, 6.1 Hz, 1H), 2.98 – 2.74 (m, 5H), 2.53 (dt, *J* = 17.5, 9.0 Hz, 1H); <sup>13</sup>C NMR (126 MHz, CDCl<sub>3</sub>) δ 167.7, 165.6, 140.7, 135.1, 134.7, 133.82, 133.79, 133.11, 133.07, 130.1, 130.01, 129.96, 129.6, 129.0, 128.0, 127.7, 127.5, 127.0, 126.8, 126.6, 124.4, 82.7, 58.3, 47.9, 41.7, 26.2; IR (film)  $\nu_{\max}$  2924, 1703, 1646, 1493, 1447, 1384, 1261, 1090, 1017, 787, 734, 695 cm<sup>-1</sup>; HRMS (ESI) calcd for C<sub>33</sub>H<sub>26</sub>Cl<sub>2</sub>N<sub>3</sub>O<sub>2</sub><sup>+</sup> [M+H]<sup>+</sup> 588.1216, found 588.1214.

**3-(4-chlorophenyl)-3'-mesityl-5-phenyl-4'*H*-6-oxa-3-azaspiro[bicyclo[3.1.0]hexane-2,5'-isoxazol]-4-one (8)**

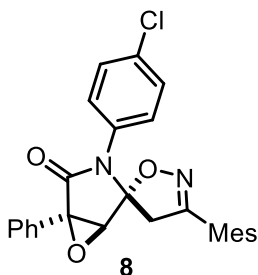

Prepared according to the general procedure (reaction time: 24 h) as described above in 36% yield (16.4 mg). It was isolated by simple filtration and dried to afford a white solid. Melting point: 134 – 136 °C. <sup>1</sup>H NMR (500 MHz, CDCl<sub>3</sub>) δ 7.64 – 7.57 (m, 2H), 7.49 – 7.37 (m, 7H), 6.84 (s, 2H), 4.36 (s, 1H), 3.51 (d, *J* = 19.3 Hz, 1H), 3.14 (d, *J* = 19.3 Hz, 1H), 2.26 (s, 3H), 1.98 (s, 6H); <sup>13</sup>C NMR (126 MHz, CDCl<sub>3</sub>) δ 167.7, 157.9, 138.5, 135.2, 133.7, 131.5, 128.9, 128.5, 128.4, 127.64, 127.58, 127.5, 126.4, 123.4, 97.5, 63.4, 60.1, 41.6, 20.0, 18.4; IR (film)  $\nu_{\max}$  3737, 3725, 3615, 1732, 1494, 1379, 843, 755, 510, 490, 471, 440, 422 cm<sup>-1</sup>; HRMS (ESI) calculated for C<sub>27</sub>H<sub>24</sub>ClN<sub>2</sub>O<sub>3</sub> [M+H]<sup>+</sup> 459.1397, found 459.1408.

# <sup>1</sup>H and <sup>13</sup>C NMR Spectra of All Products

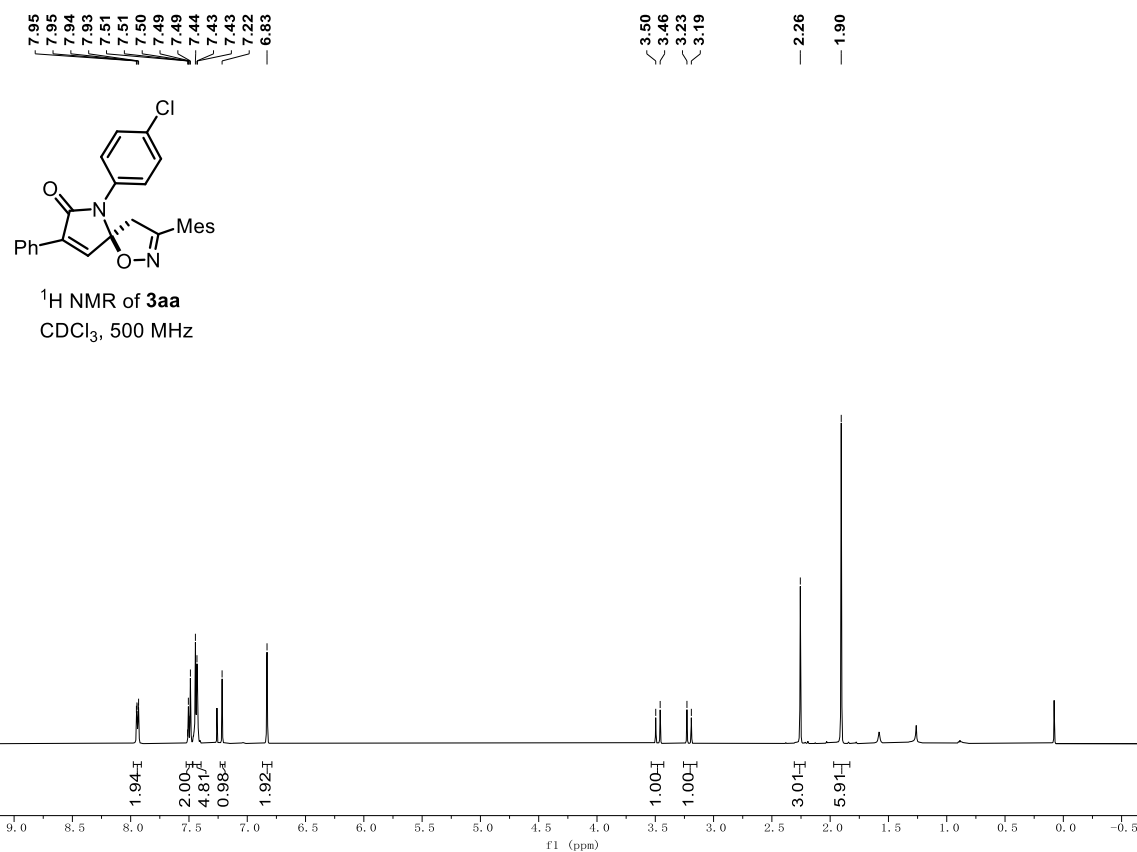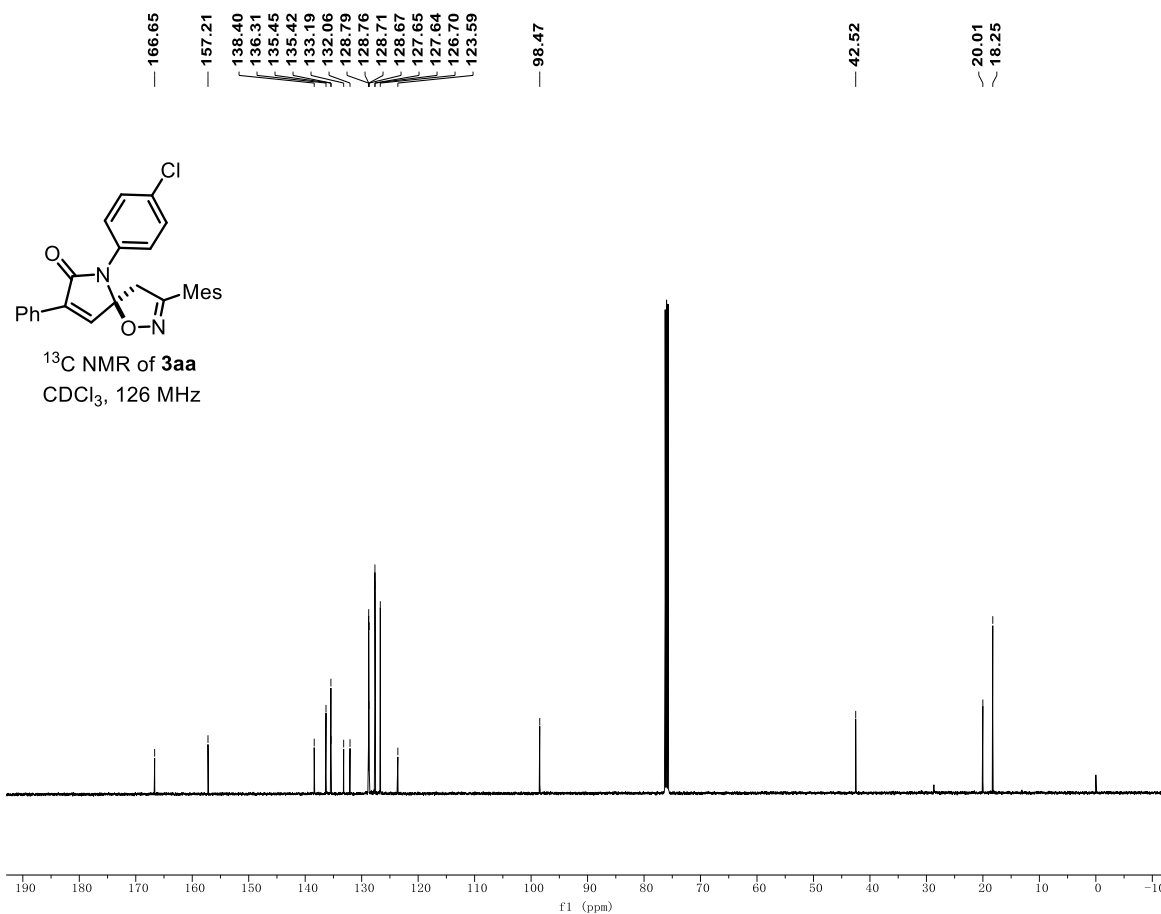

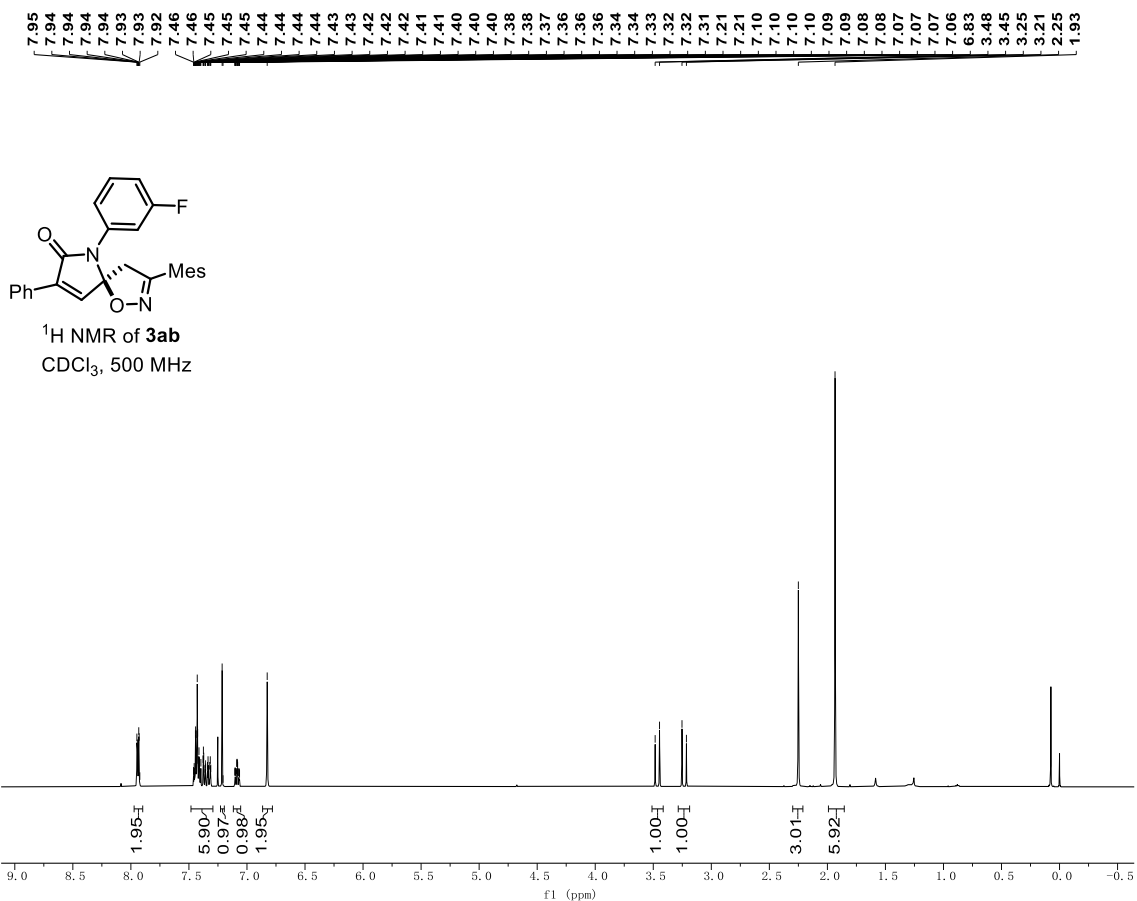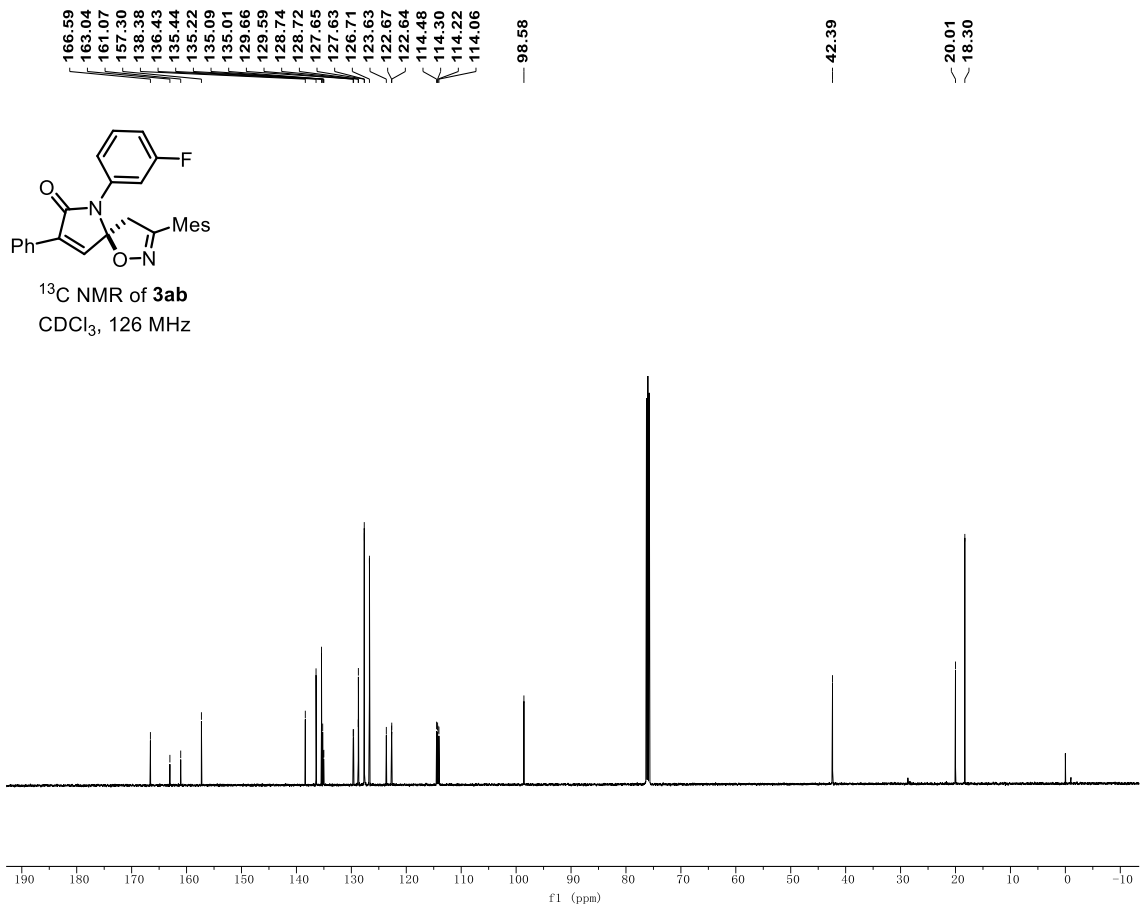

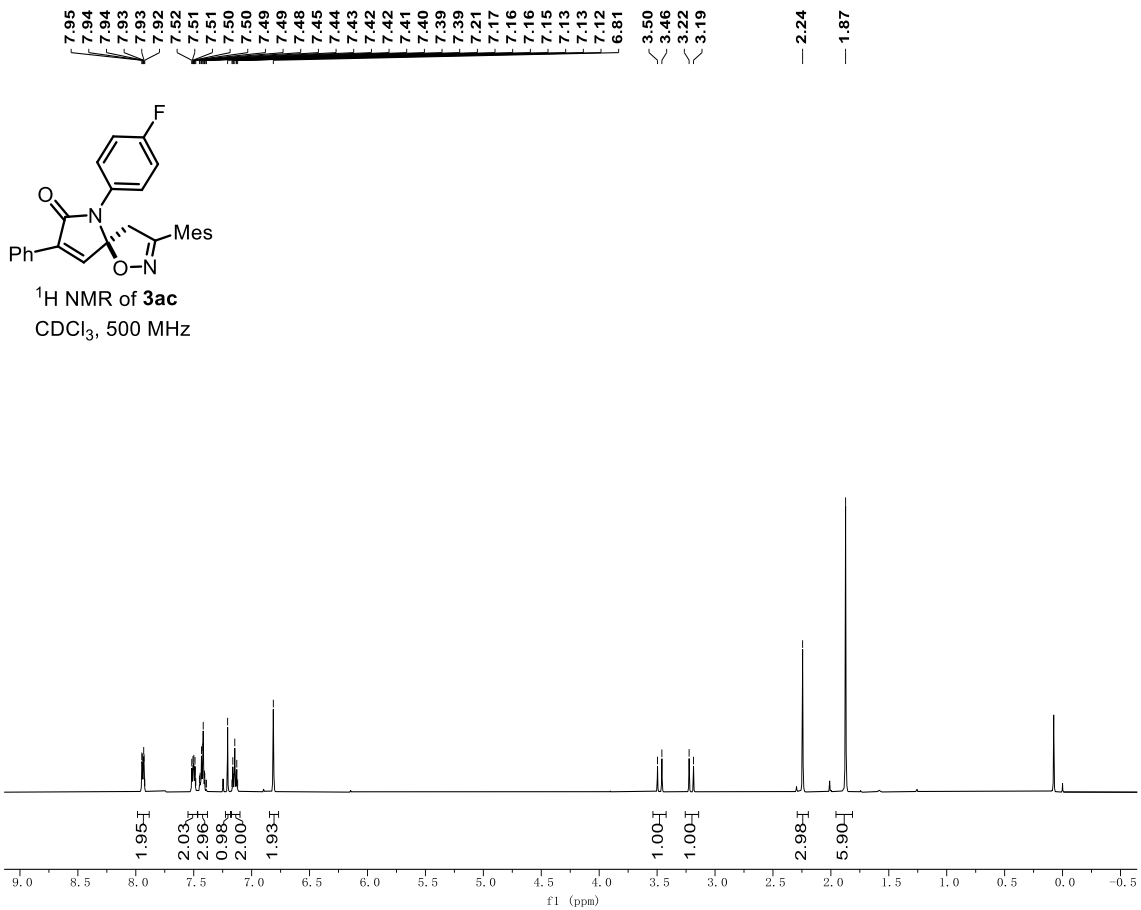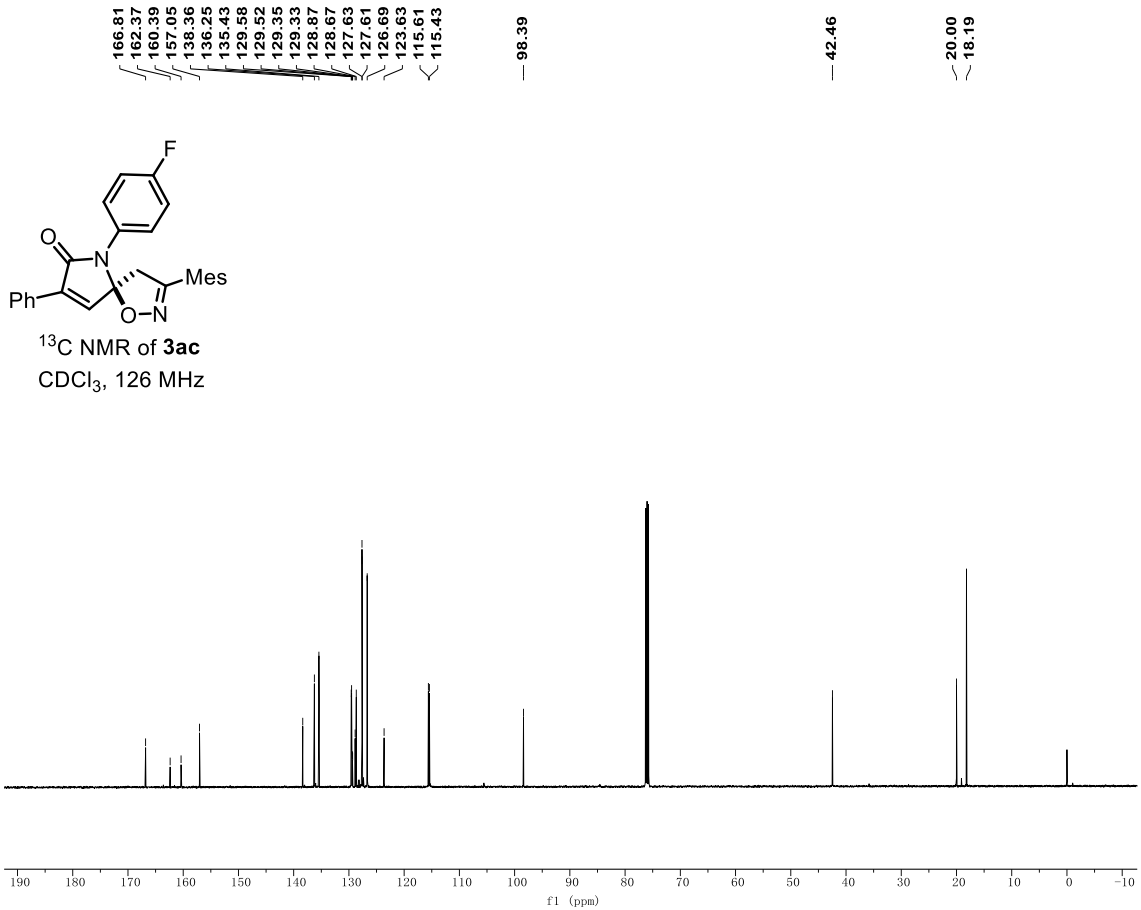



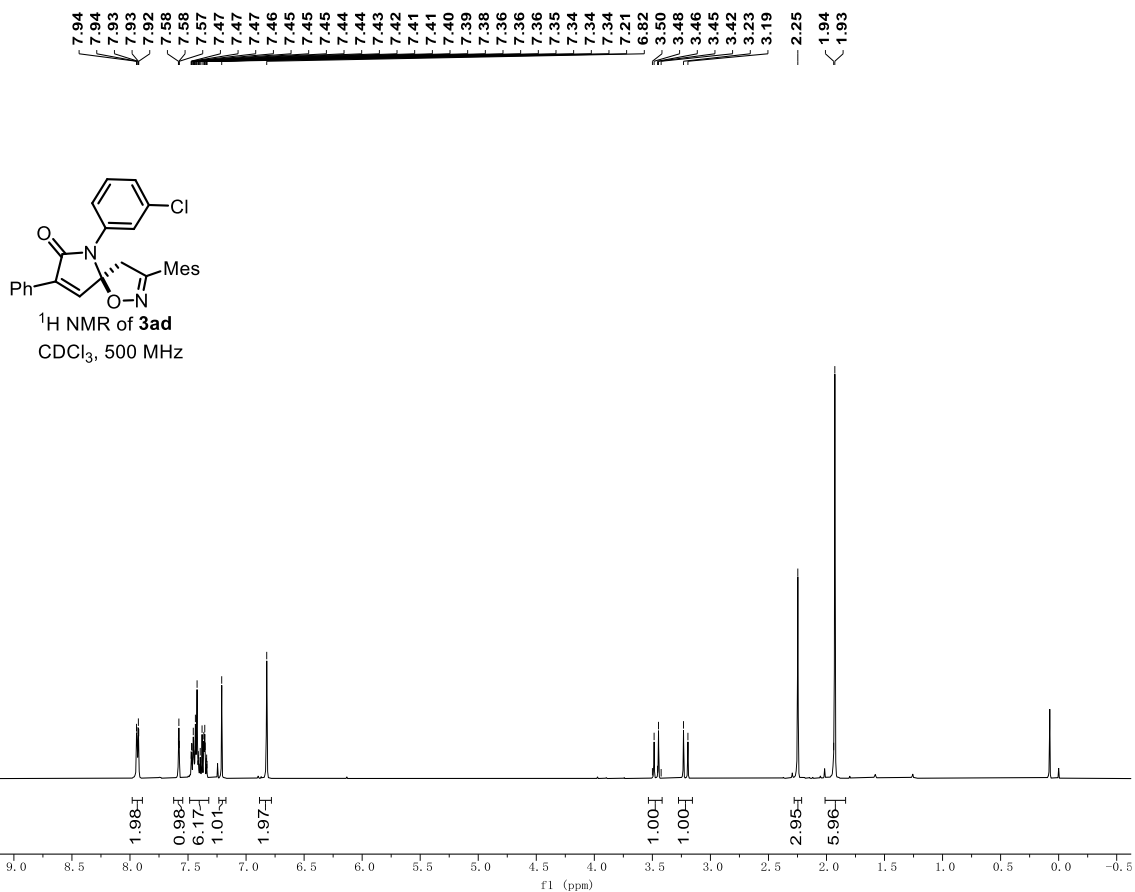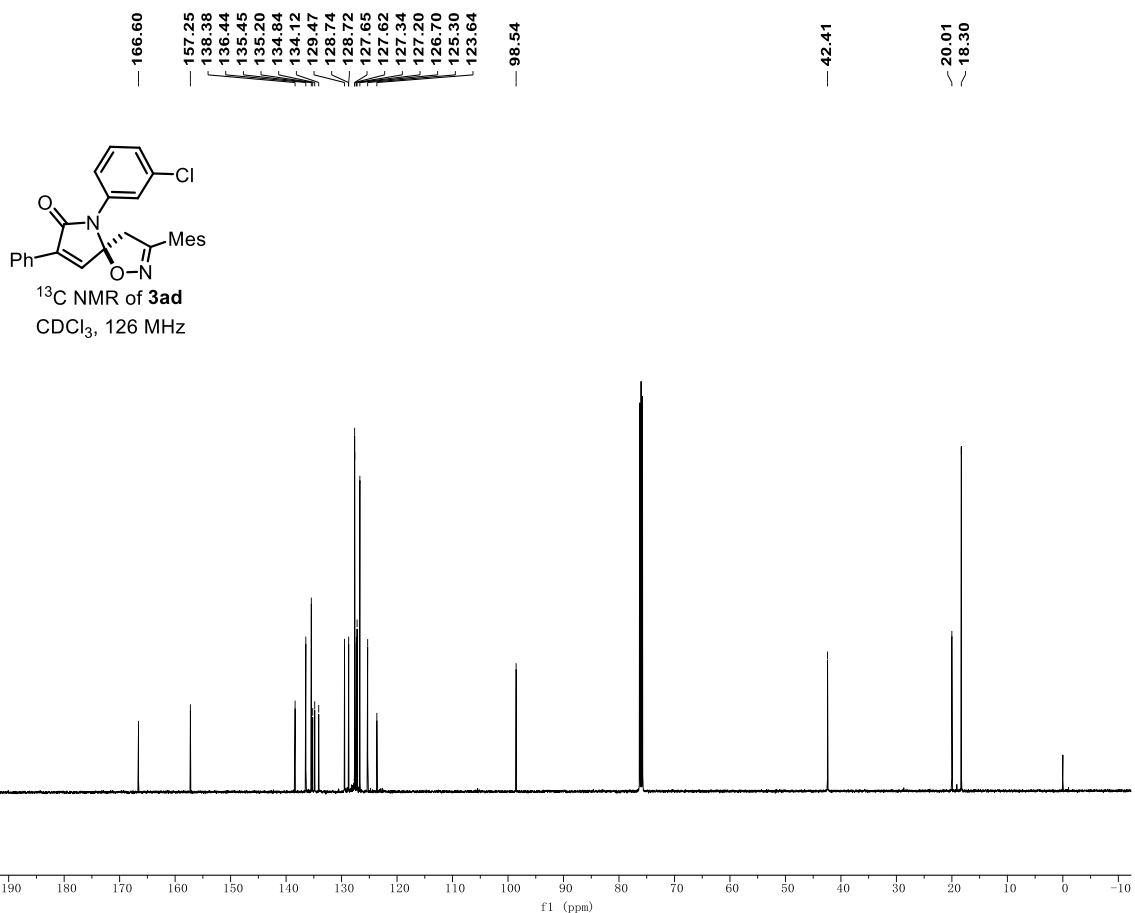

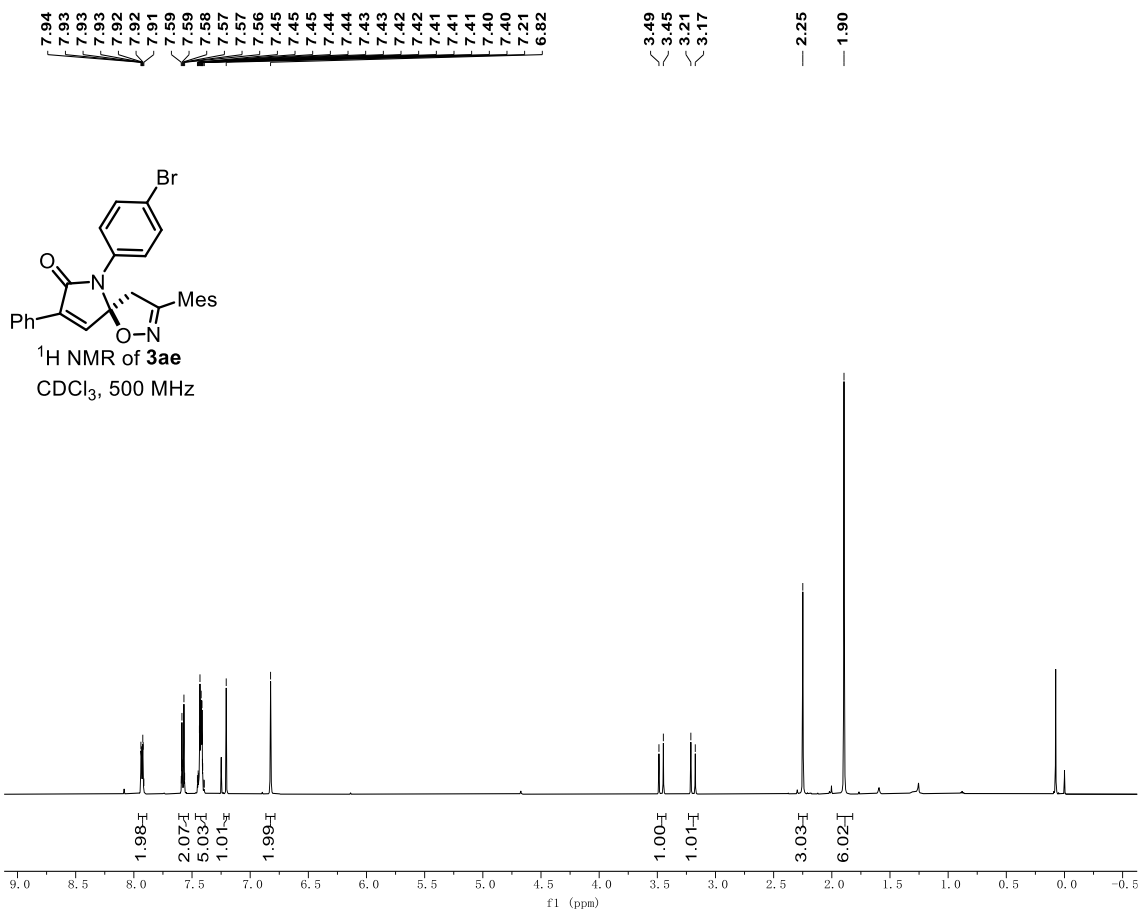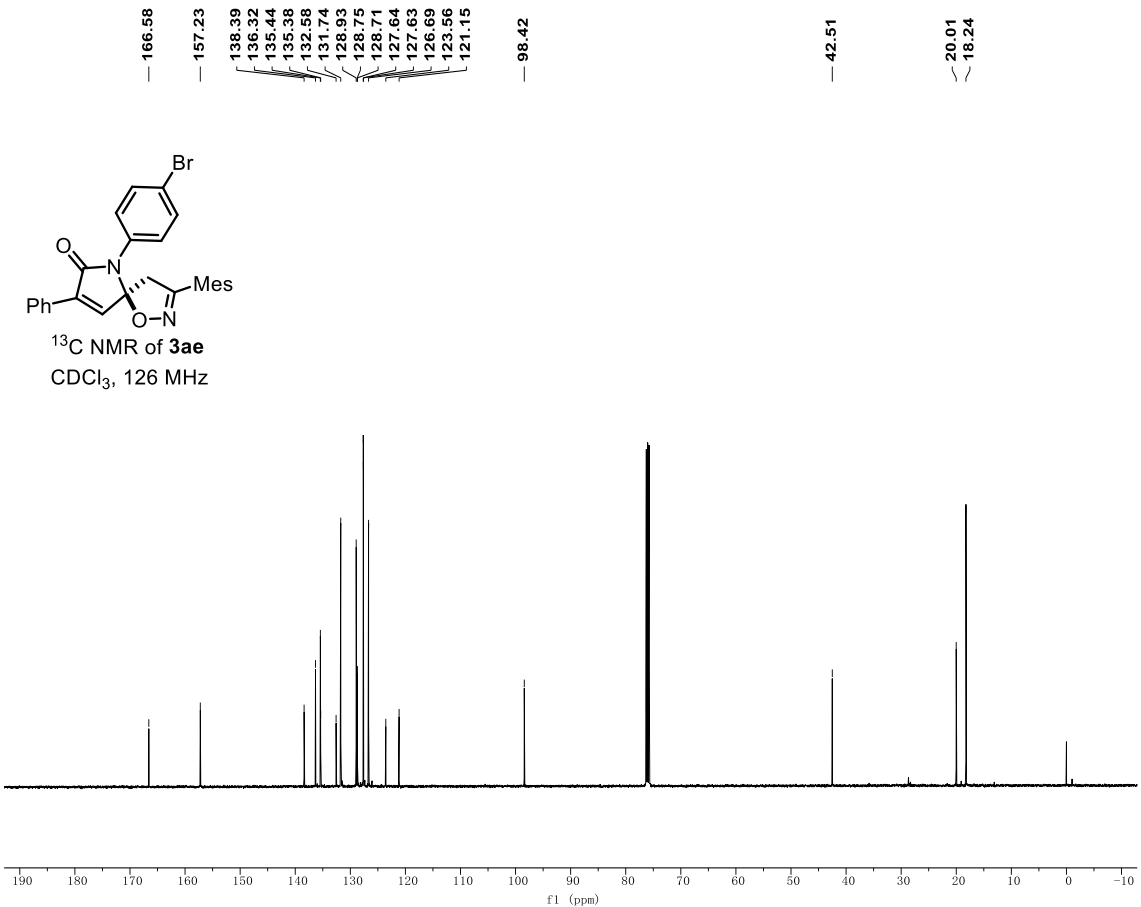

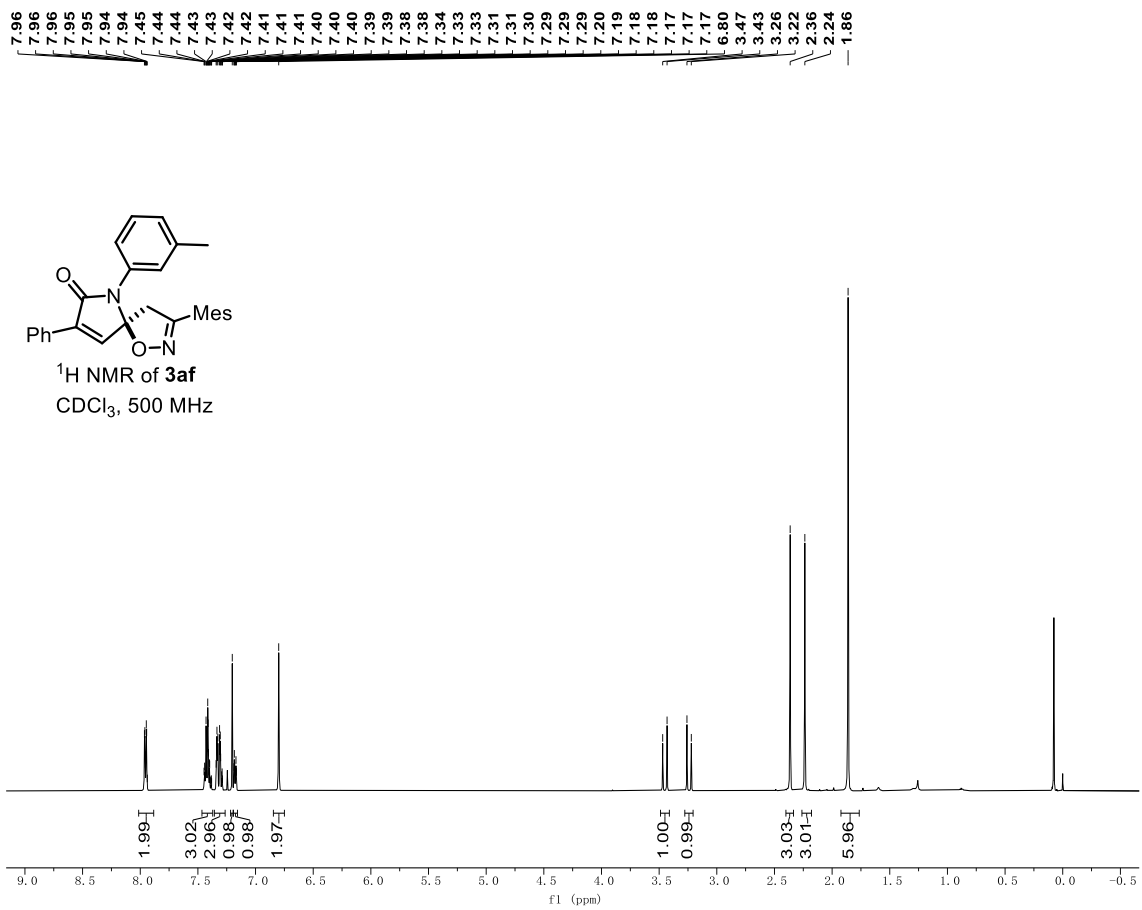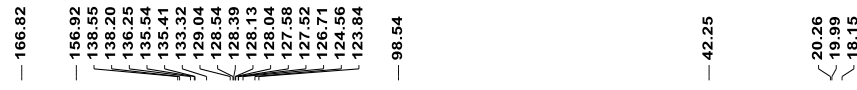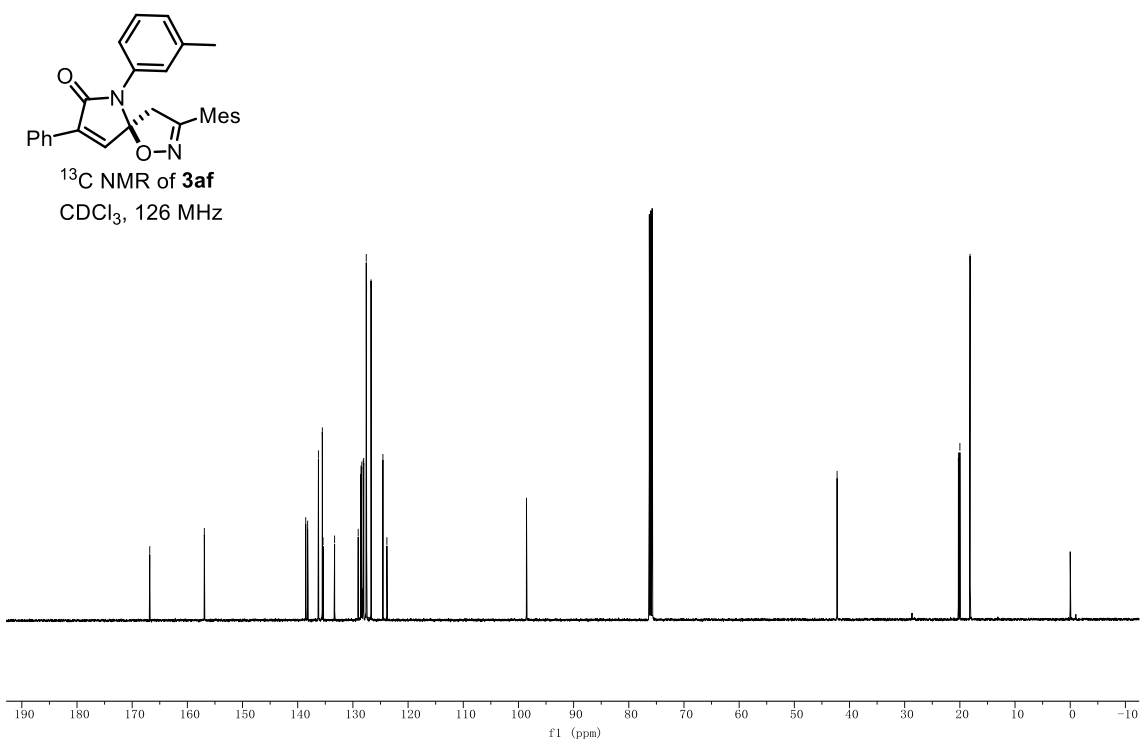

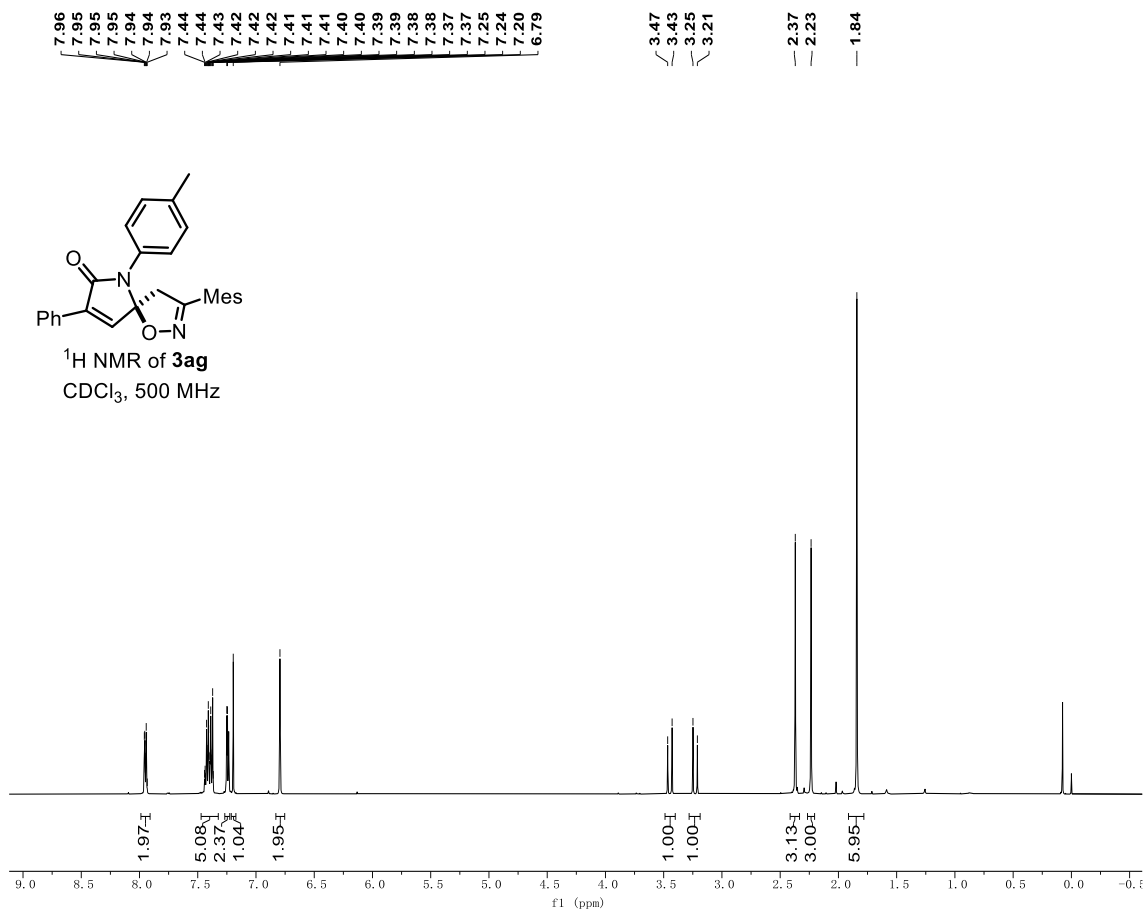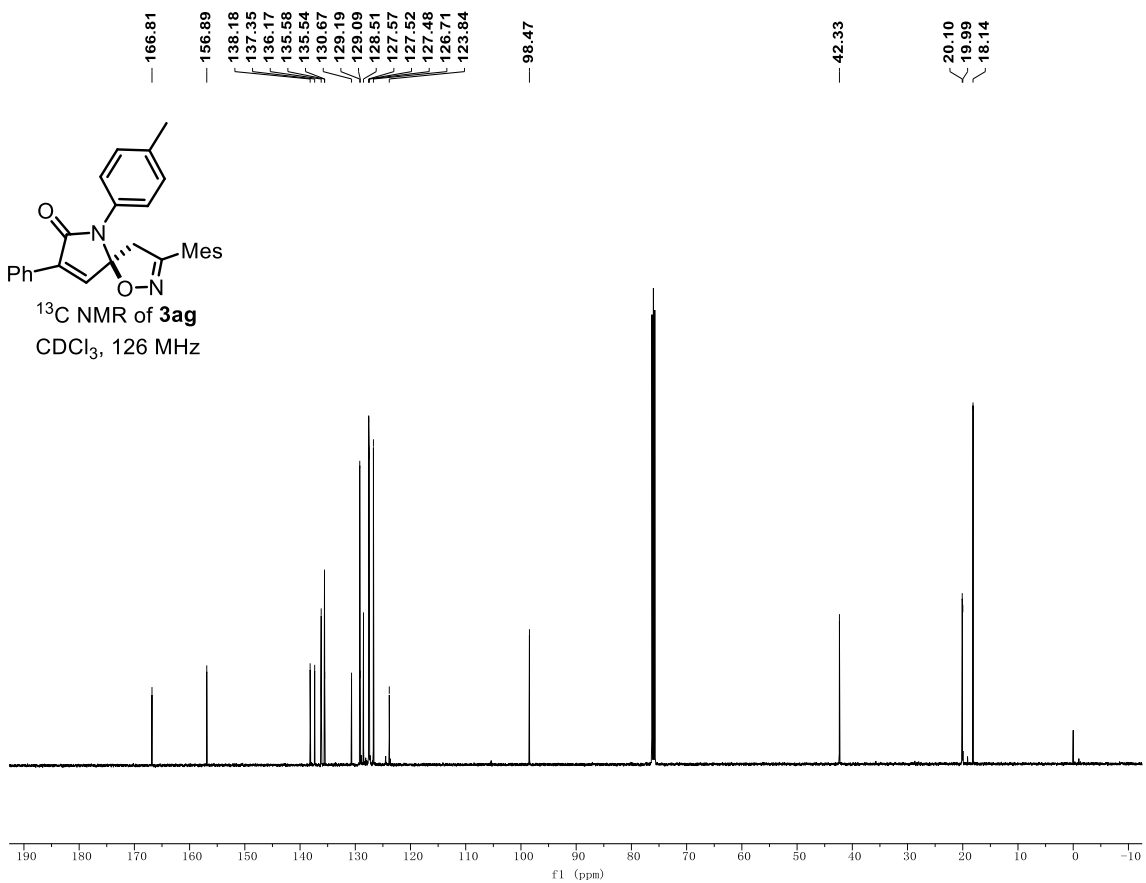

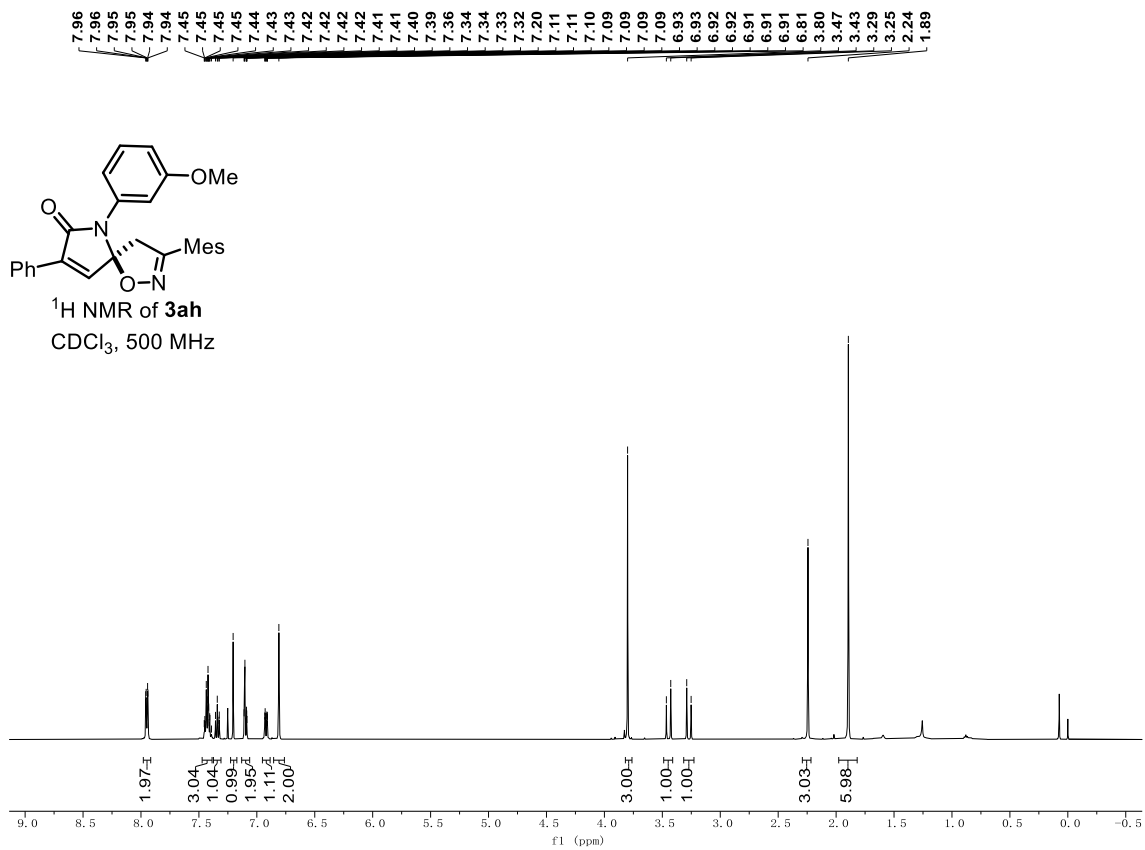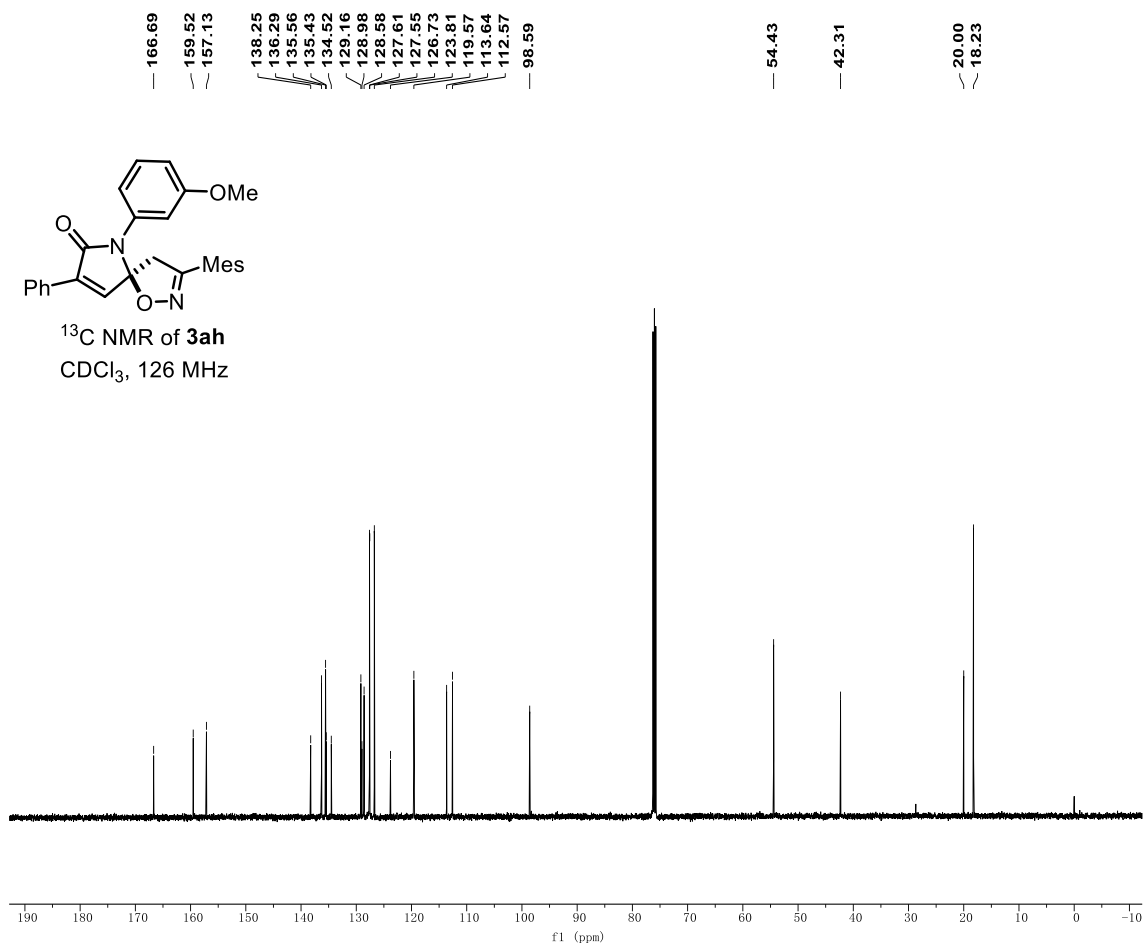

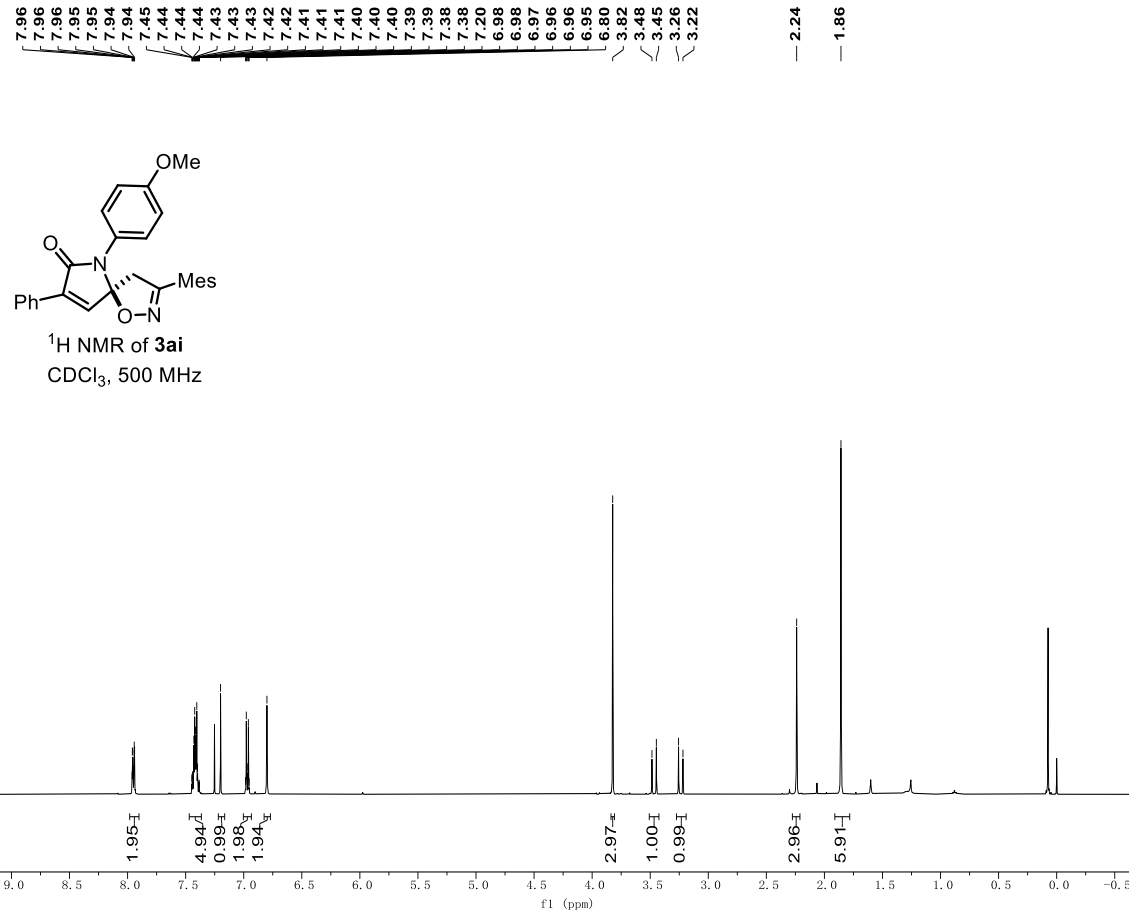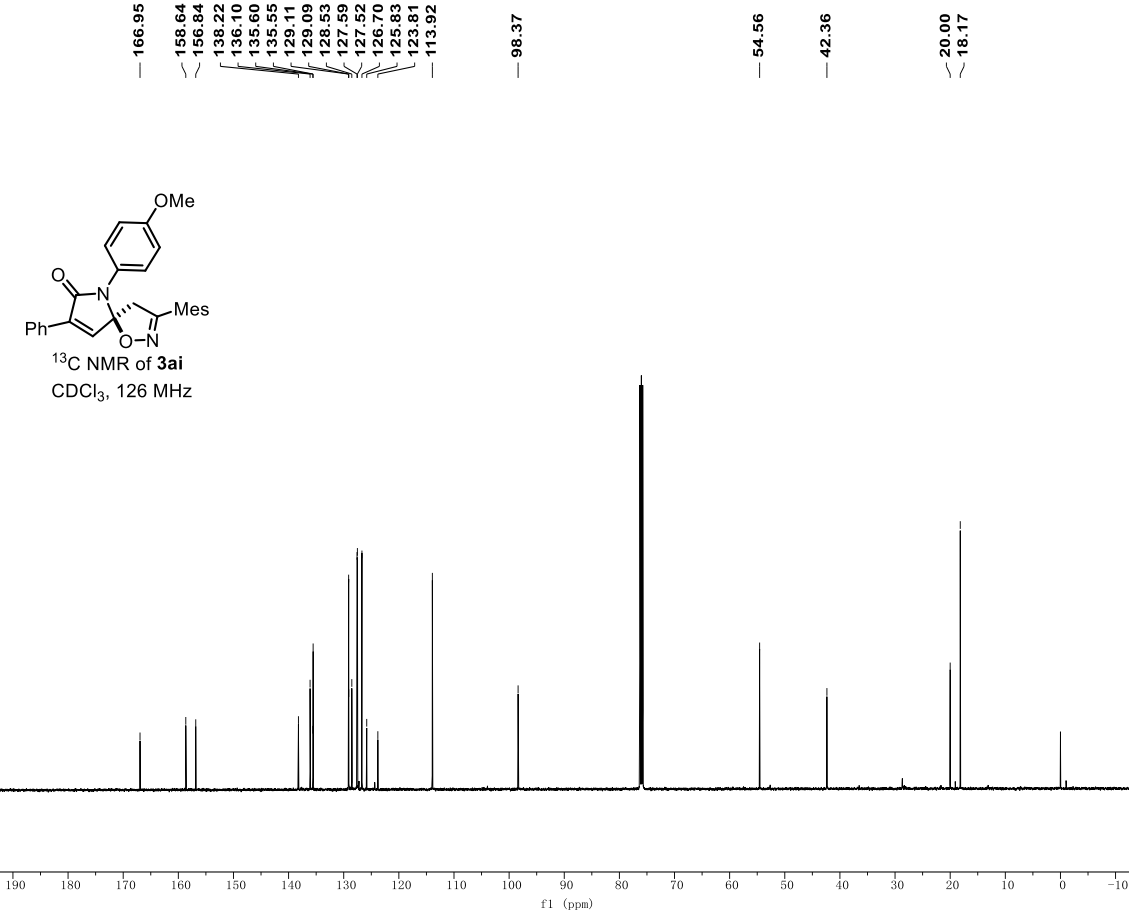

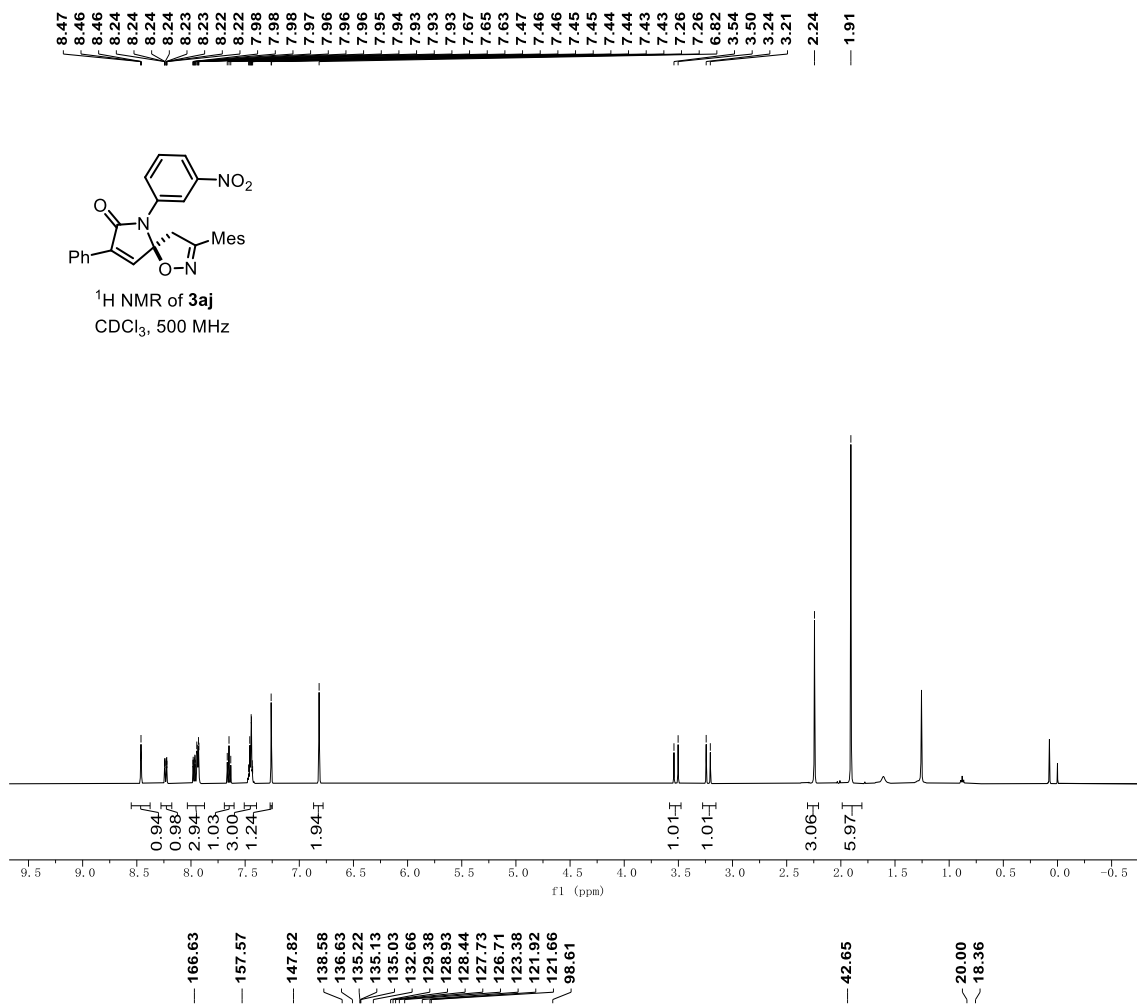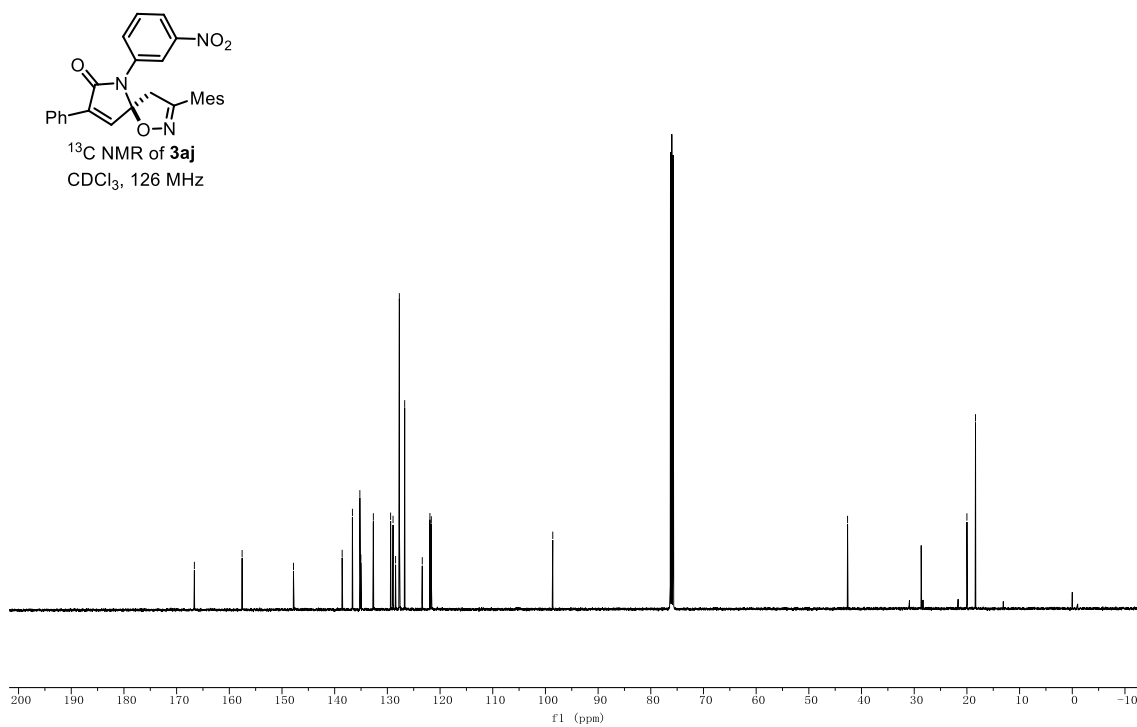

7.93  
7.93  
7.92  
7.91  
7.78  
7.76  
7.75  
7.46  
7.45  
7.44  
7.44  
7.43  
6.86

3.49  
3.45  
3.23  
3.19

2.27  
1.97

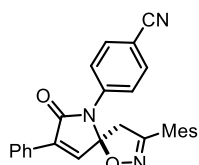

<sup>1</sup>H NMR of **3ak**  
CDCl<sub>3</sub>, 500 MHz

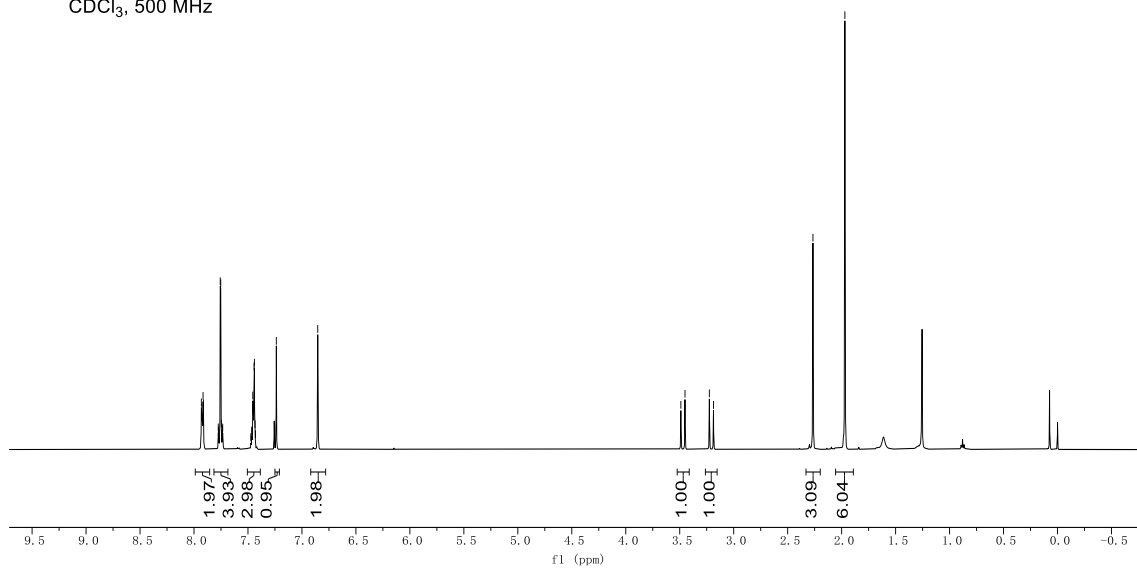

166.49  
157.81  
138.65  
138.25  
136.71  
135.25  
135.05  
132.31  
128.94  
128.40  
127.79  
127.73  
126.72  
126.59  
123.37  
117.19  
110.23  
98.75

42.66

20.02  
18.50

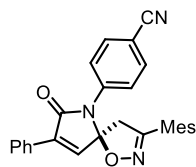

<sup>13</sup>C NMR of **3ak**  
CDCl<sub>3</sub>, 126 MHz

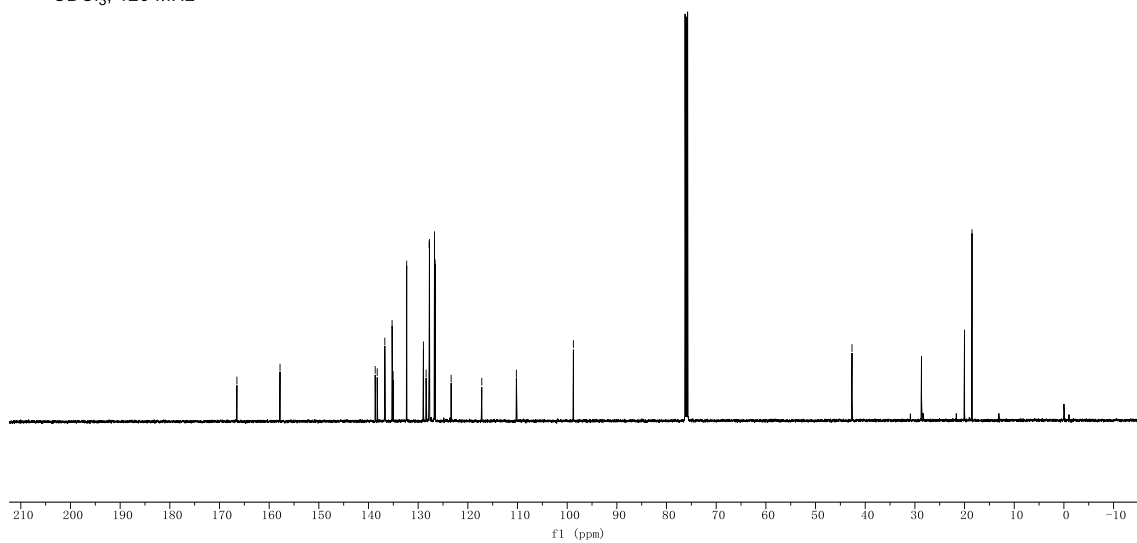



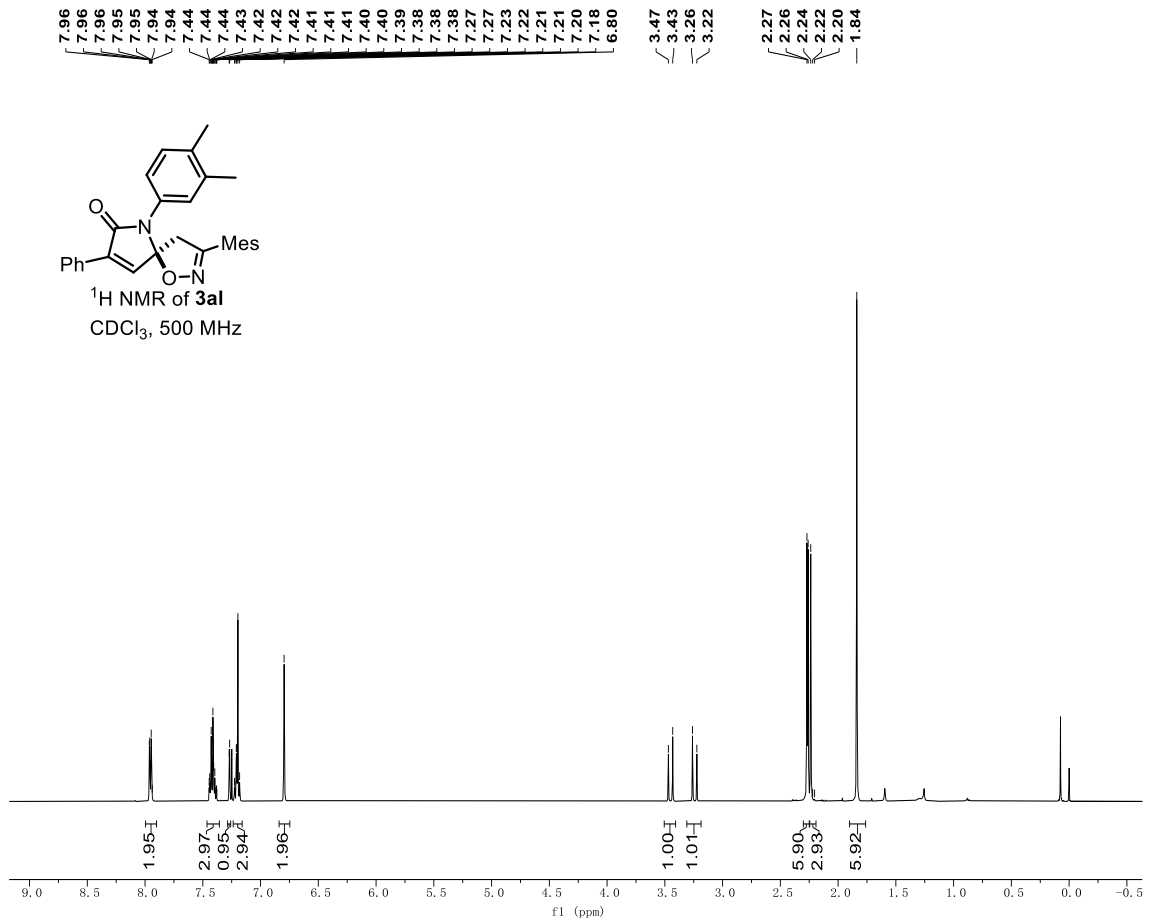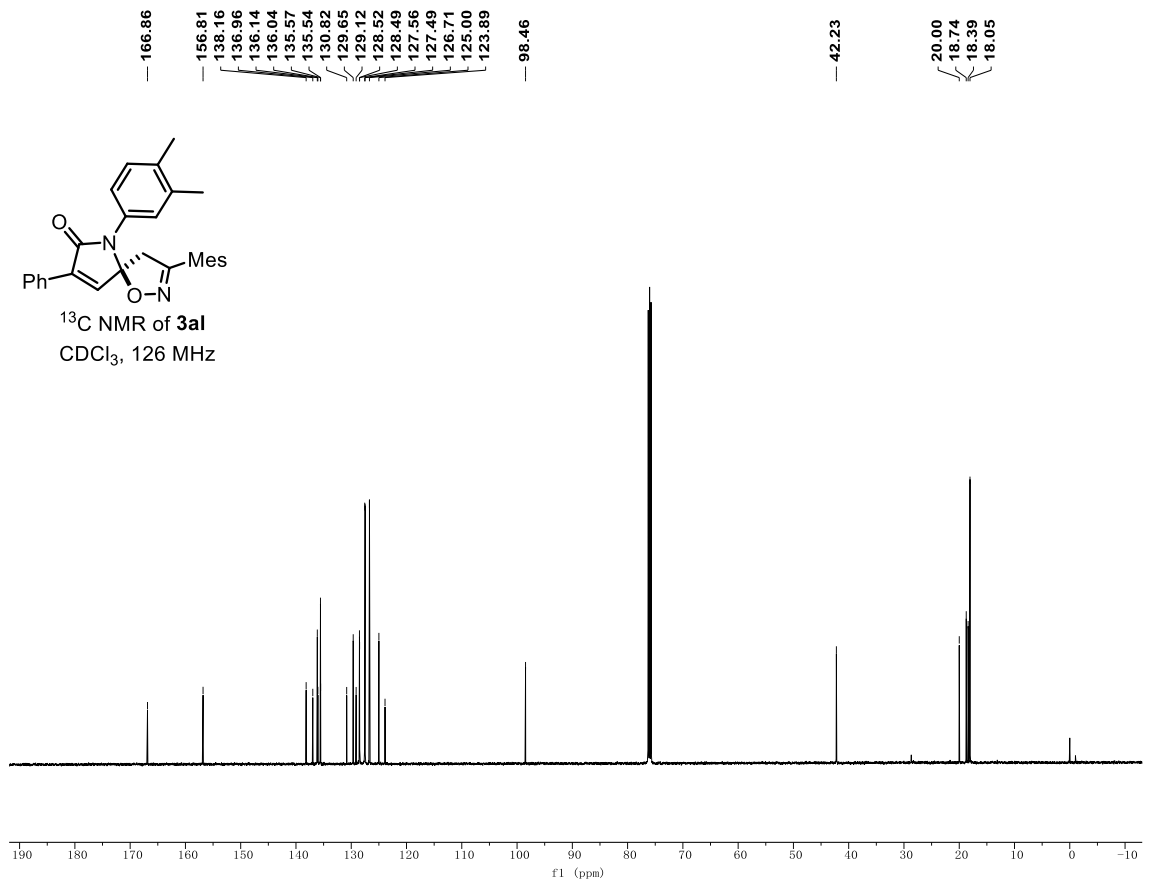

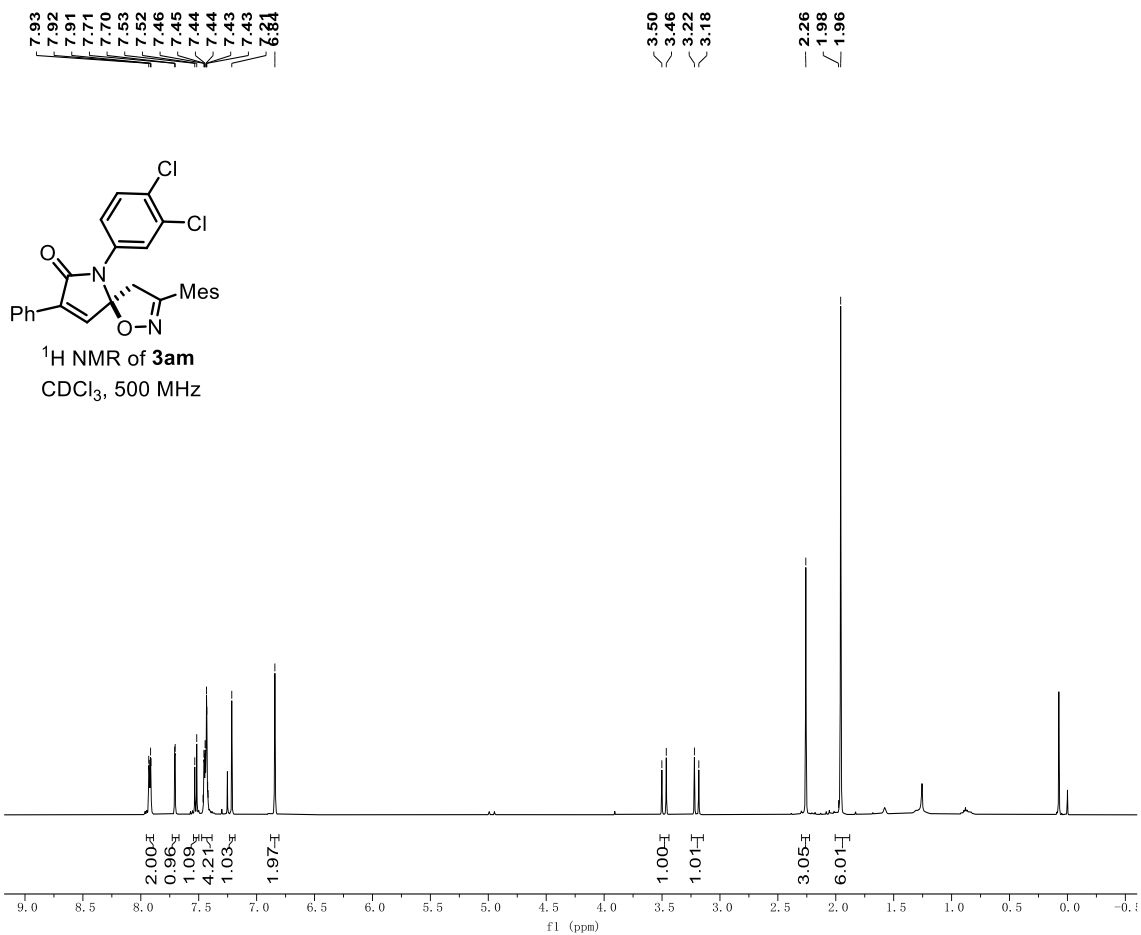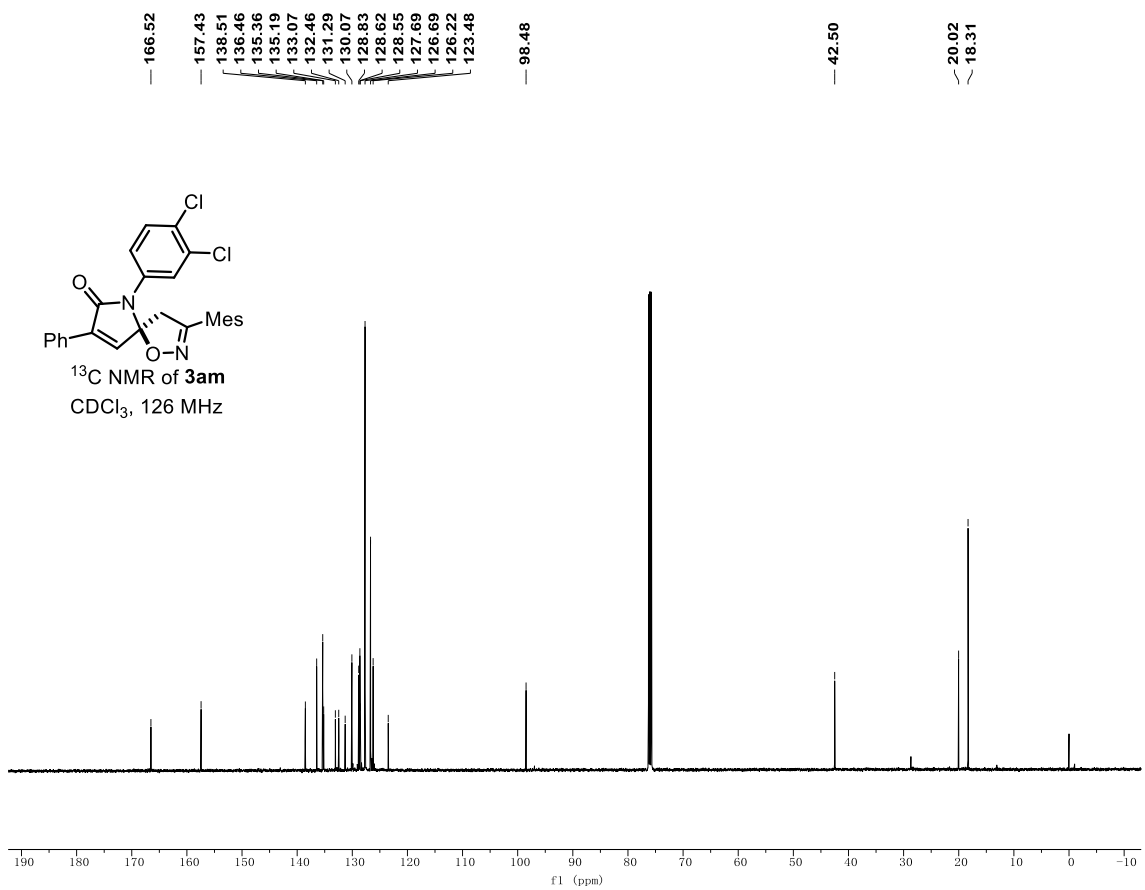

7.52  
7.51  
7.51  
7.50  
7.49  
7.49  
7.46  
7.46  
7.44  
7.44  
7.44  
7.43  
7.42  
7.42  
7.41  
7.41  
7.33  
7.33  
7.31  
7.31  
7.31  
7.30  
7.30  
7.29  
7.28  
7.27  
7.27  
7.26  
7.25  
7.02  
6.83

3.49  
3.45  
3.25  
3.22  
2.43  
2.25  
1.90

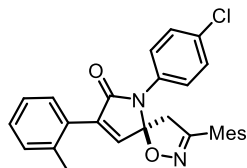

<sup>1</sup>H NMR of **3an**  
CDCl<sub>3</sub>, 500 MHz

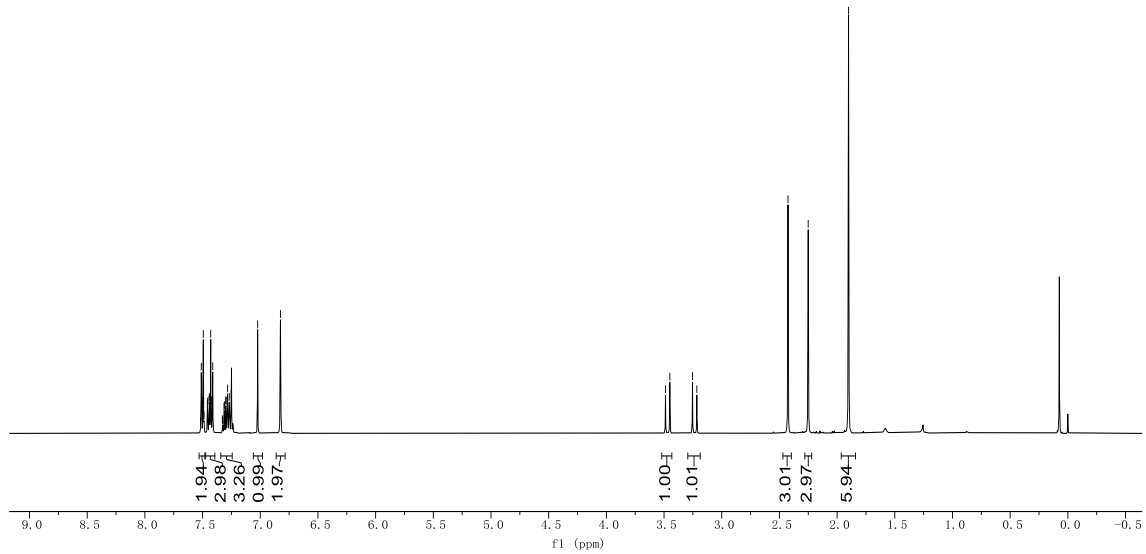

166.65  
157.28  
139.83  
138.40  
137.39  
135.98  
135.44  
133.04  
132.17  
129.63  
128.85  
128.72  
128.47  
128.20  
127.64  
124.78  
123.56  
98.80

42.49  
20.01  
19.65  
18.27

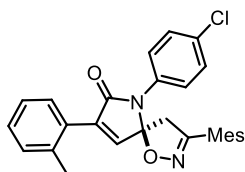

<sup>13</sup>C NMR of **3an**  
CDCl<sub>3</sub>, 126 MHz

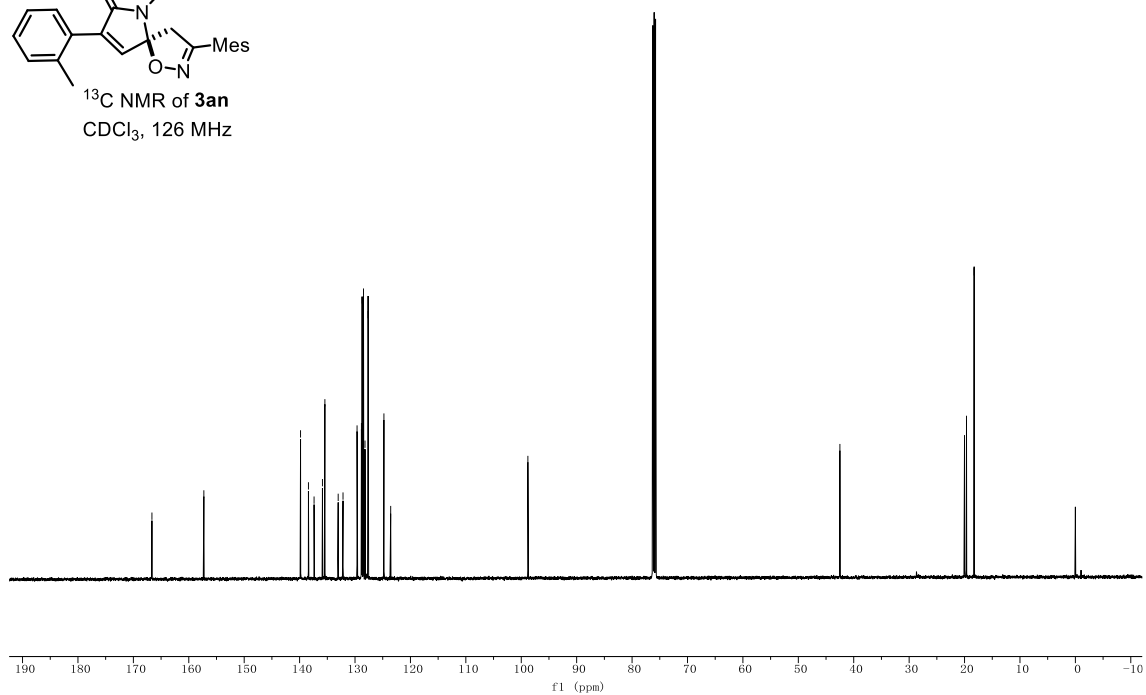

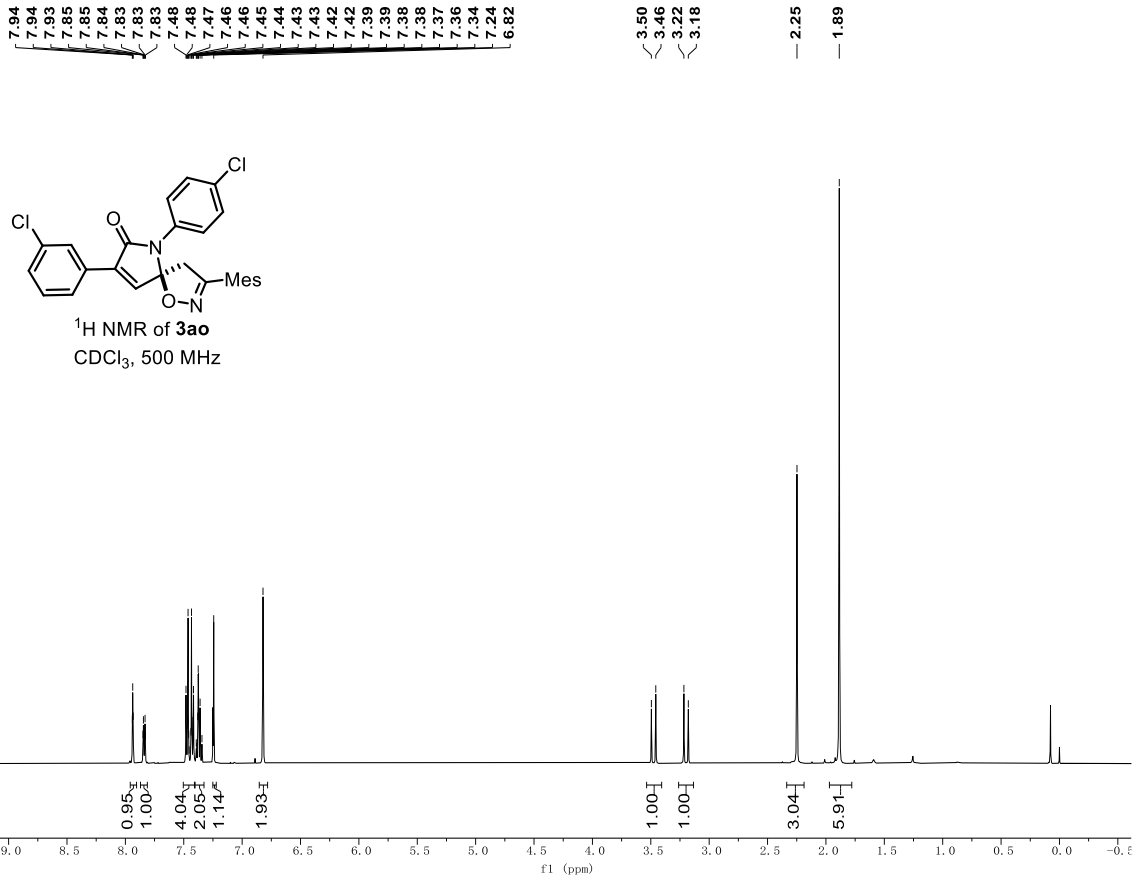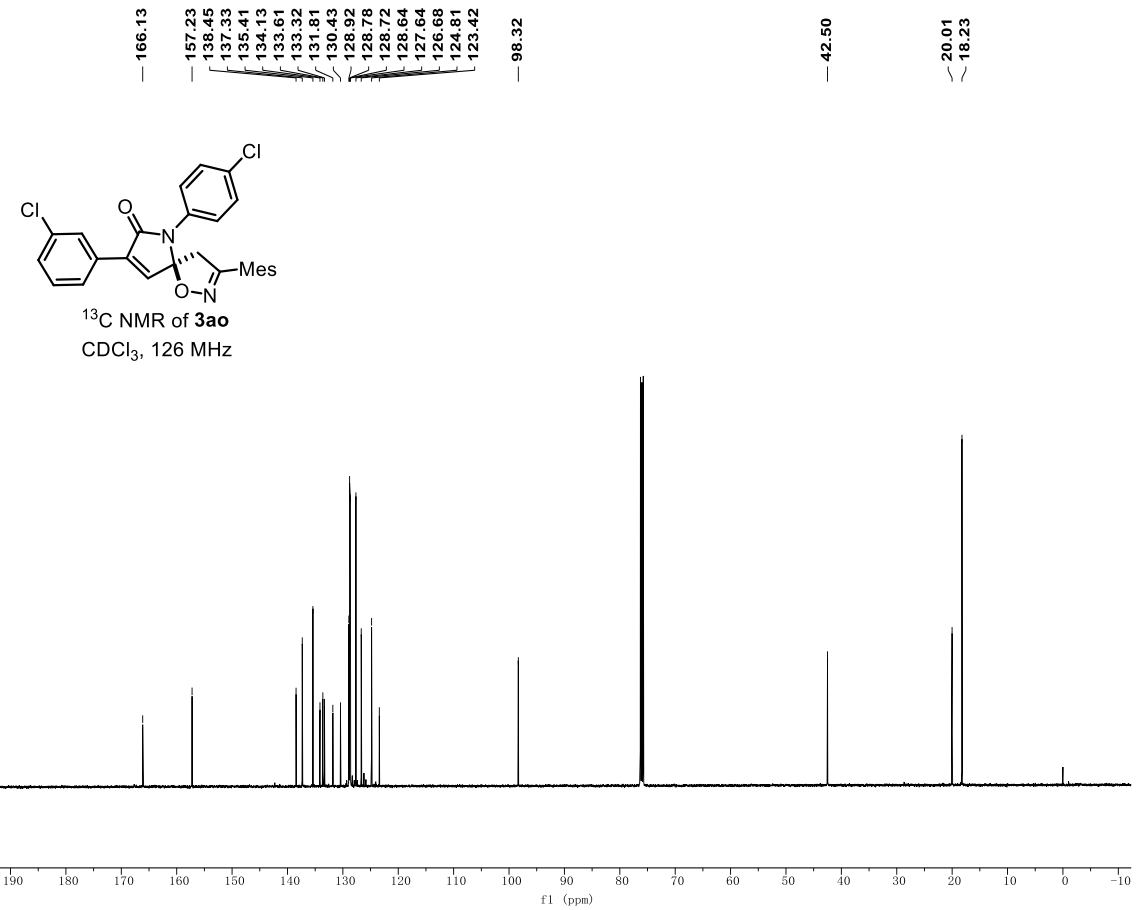

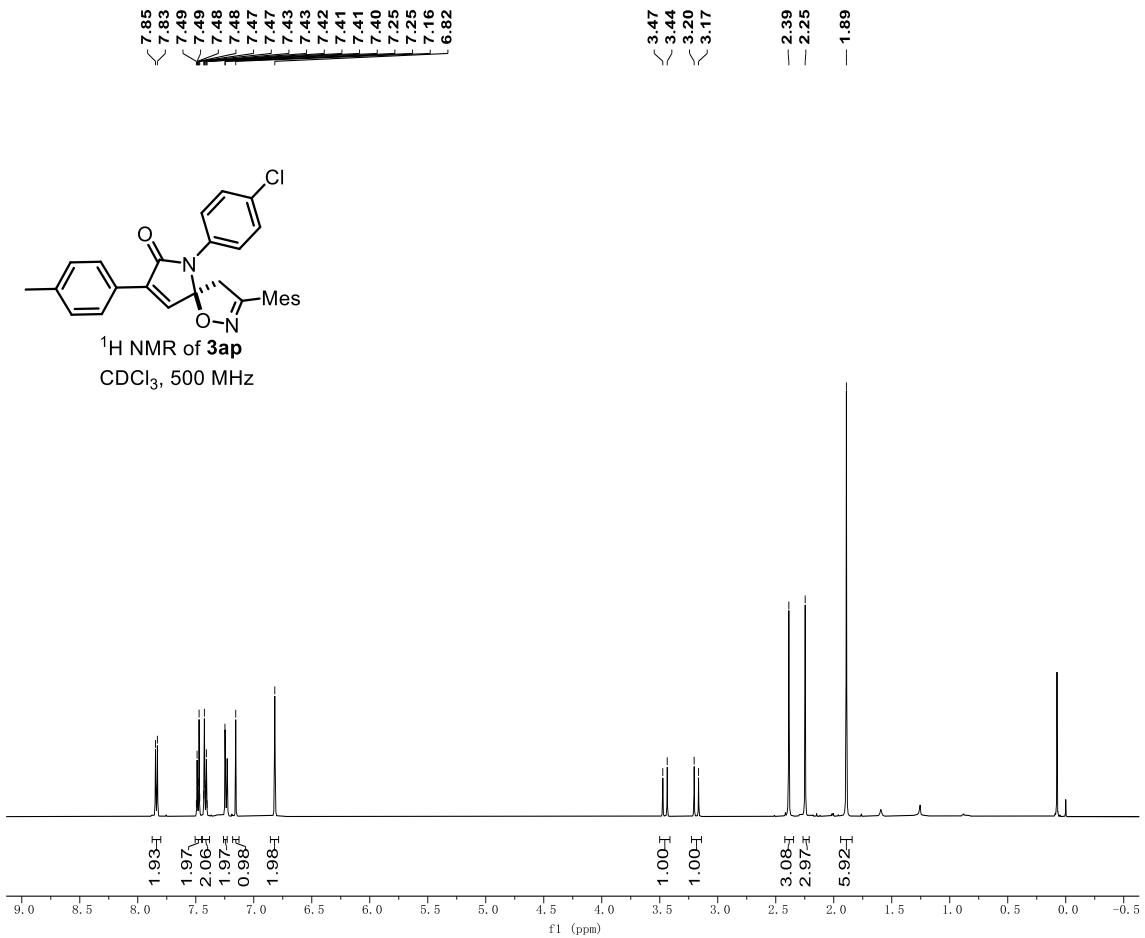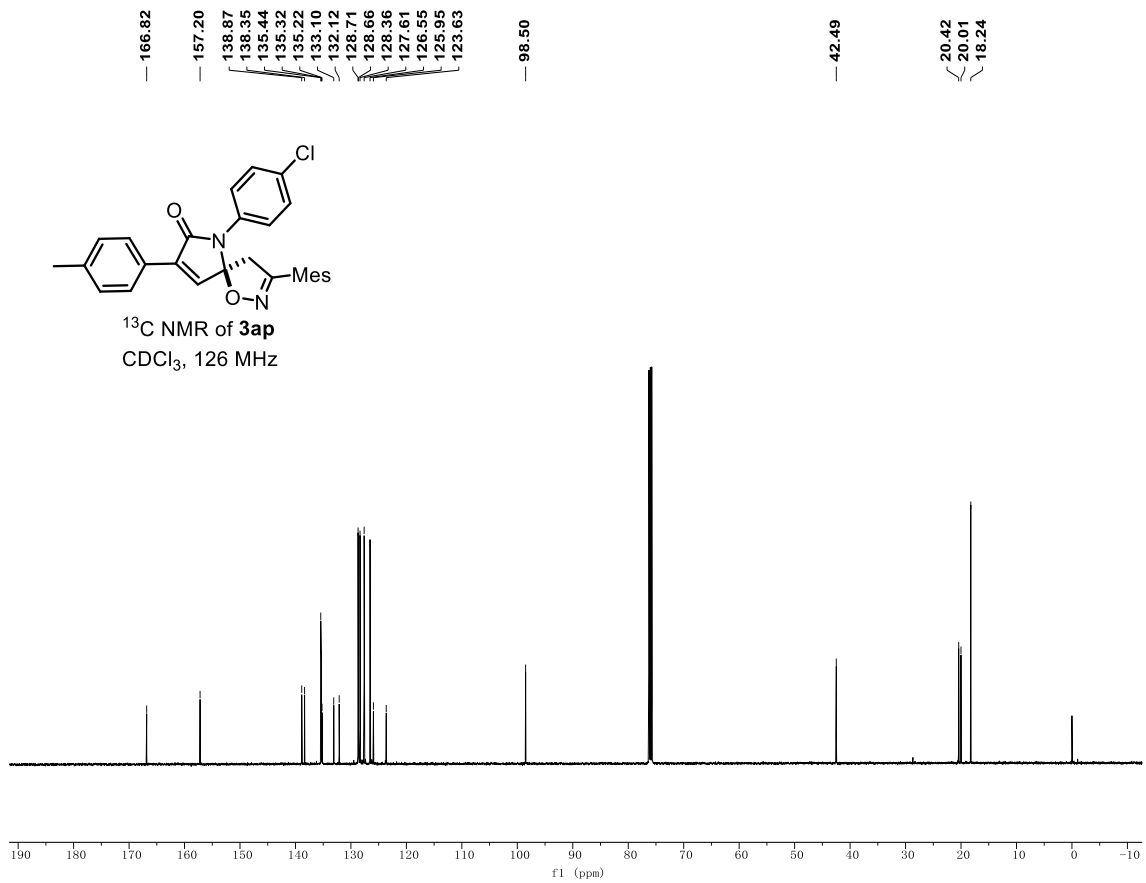

7.44  
7.44  
7.43  
7.42  
7.42  
7.40  
7.40  
7.39  
7.39  
7.38  
6.81  
6.63  
6.63  
3.36  
3.32  
3.13  
3.09  
2.49  
2.48  
2.48  
2.47  
2.24  
2.06  
2.06  
2.05  
2.05  
2.03  
2.02  
2.01  
2.00  
1.99  
1.88  
1.88  
1.84  
1.83  
1.82  
1.81  
1.80  
1.80  
1.42  
1.41  
1.41  
1.40  
1.39  
1.38  
1.37  
1.36  
1.31  
1.31  
1.29  
1.29  
1.28  
1.27  
1.26  
1.26  
1.25  
1.25  
1.24  
1.23  
1.23  
1.22  
1.21

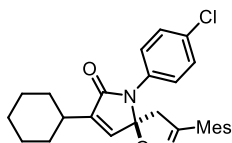

<sup>1</sup>H NMR of **3aq**  
CDCl<sub>3</sub>, 500 MHz

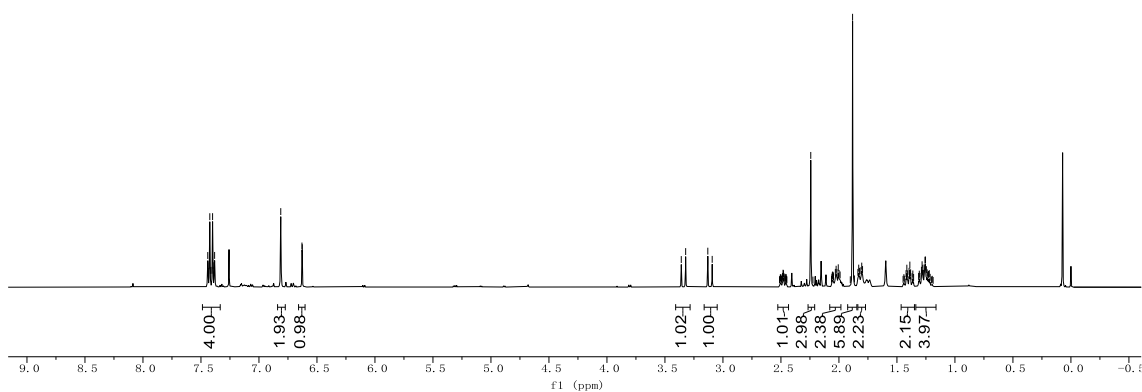

167.67  
157.23  
144.30  
138.30  
135.43  
135.25  
132.78  
132.25  
128.61  
128.32  
127.59  
123.75  
99.24  
42.25  
33.68  
30.61  
30.50  
25.07  
25.04  
20.00  
18.25

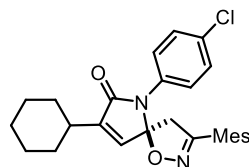

<sup>13</sup>C NMR of **3aq**  
CDCl<sub>3</sub>, 126 MHz

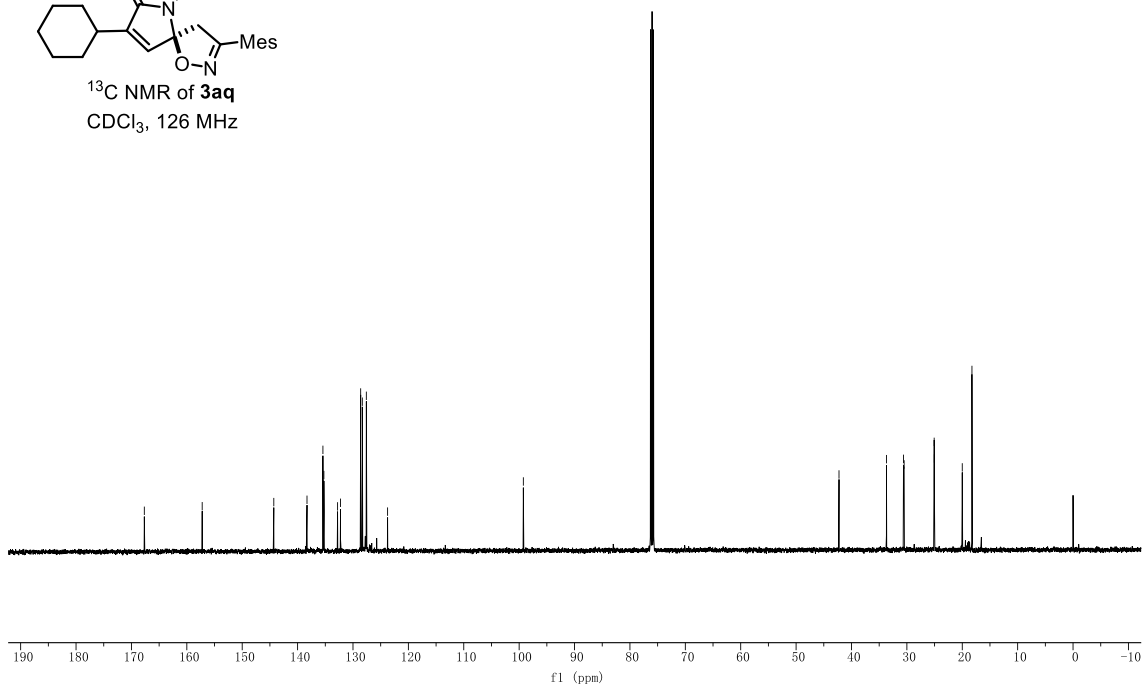

7.96  
7.96  
7.95  
7.95  
7.94  
7.94  
7.93  
7.92  
7.51  
7.50  
7.49  
7.49  
7.48  
7.48  
7.47  
7.47  
7.46  
7.46  
7.45  
7.45  
7.44  
7.44  
7.43  
7.43  
7.42  
7.42  
7.41  
7.41  
7.41  
7.40  
7.40  
7.32  
7.32  
7.31  
7.29  
7.27  
7.27  
7.25  
7.24  
3.60  
3.56  
3.35  
3.32

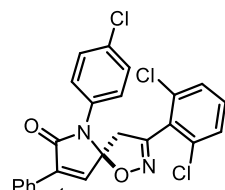

<sup>1</sup>H NMR of **3ba**  
CDCl<sub>3</sub>, 500 MHz

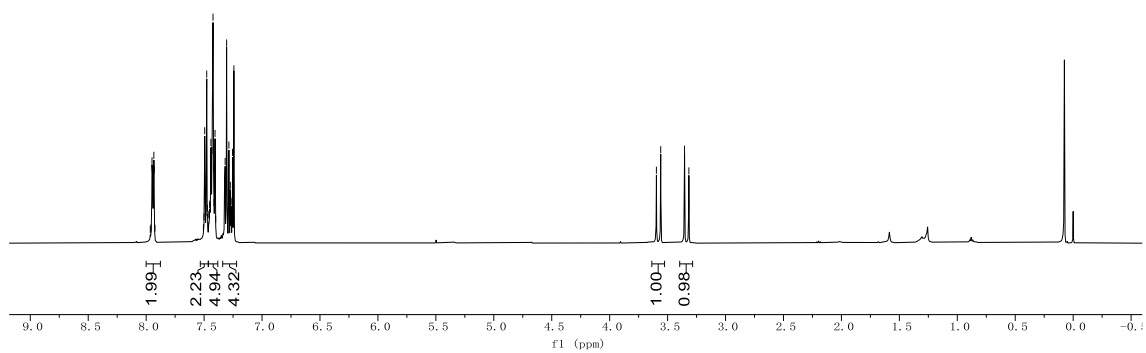

166.72  
153.62  
136.03  
135.41  
133.88  
132.83  
131.96  
130.51  
128.79  
128.69  
128.64  
128.29  
127.66  
127.20  
126.75  
126.27  
99.48  
40.51

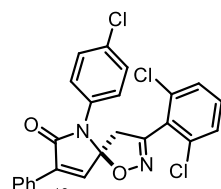

<sup>13</sup>C NMR of **3ba**  
CDCl<sub>3</sub>, 126 MHz

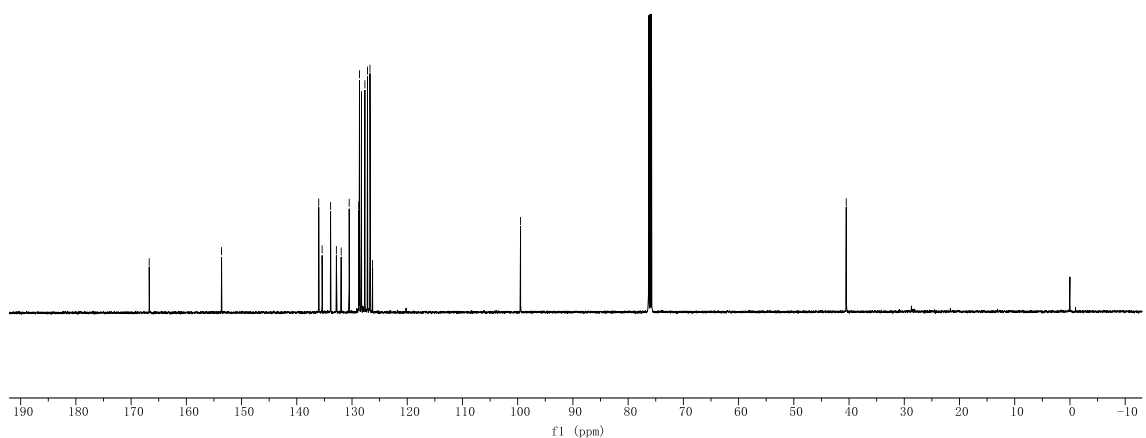

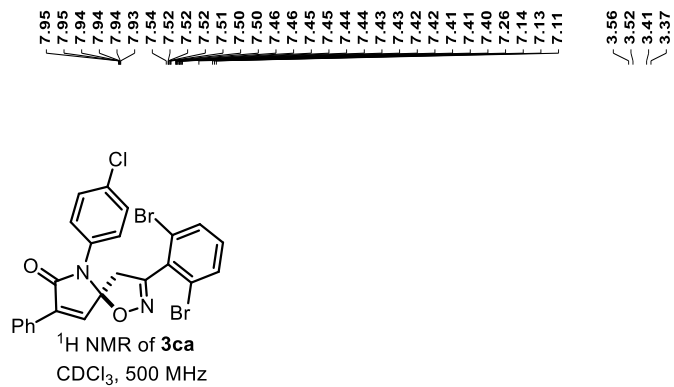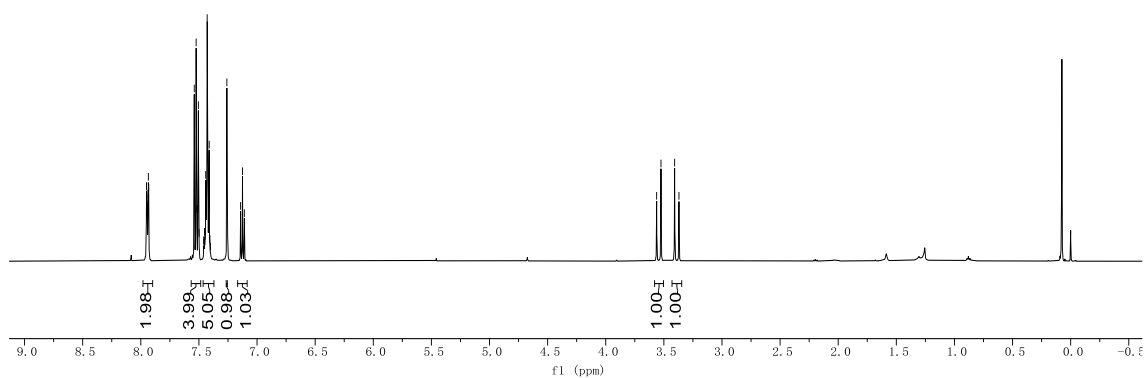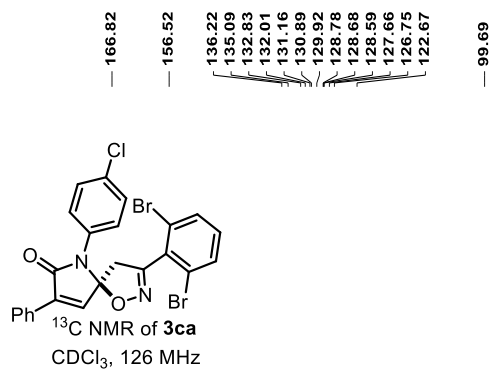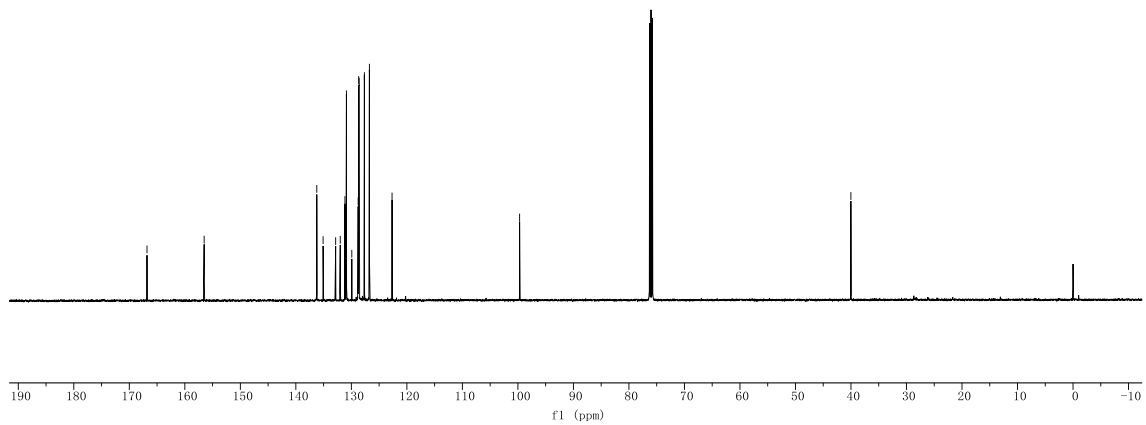



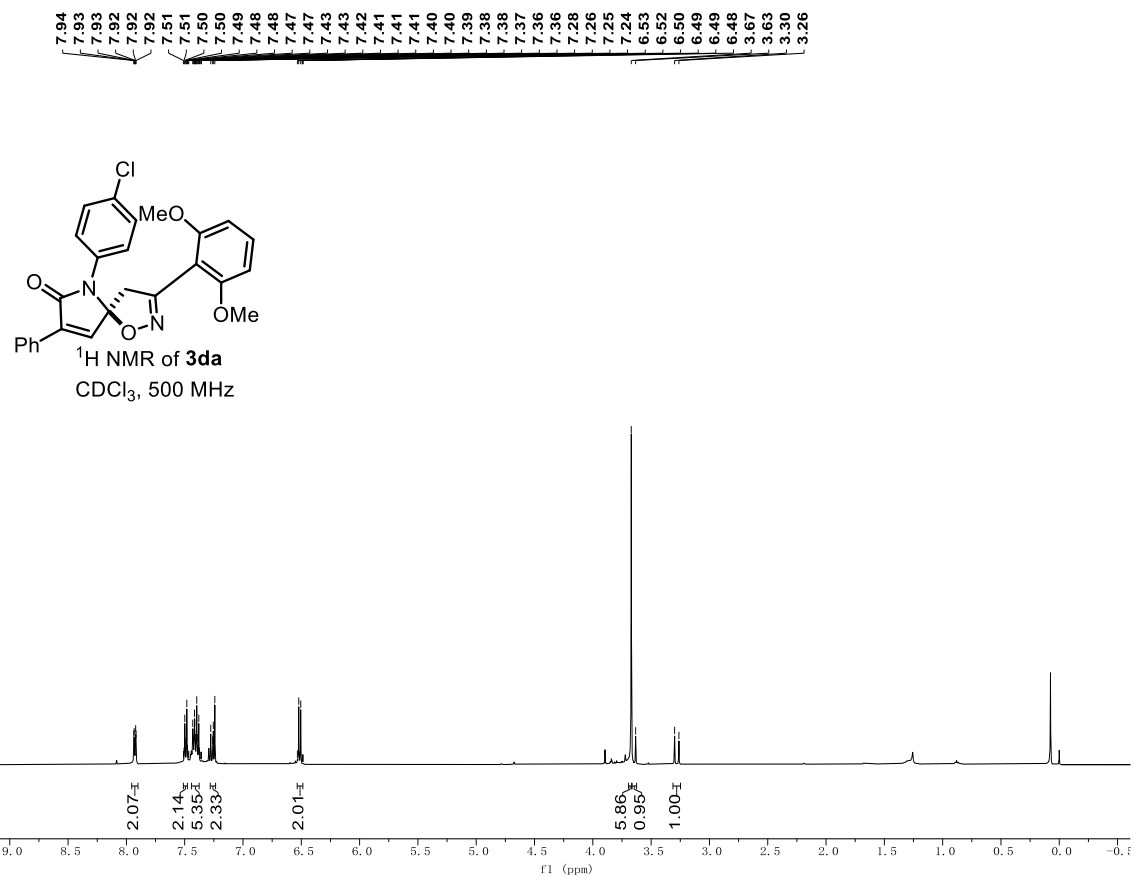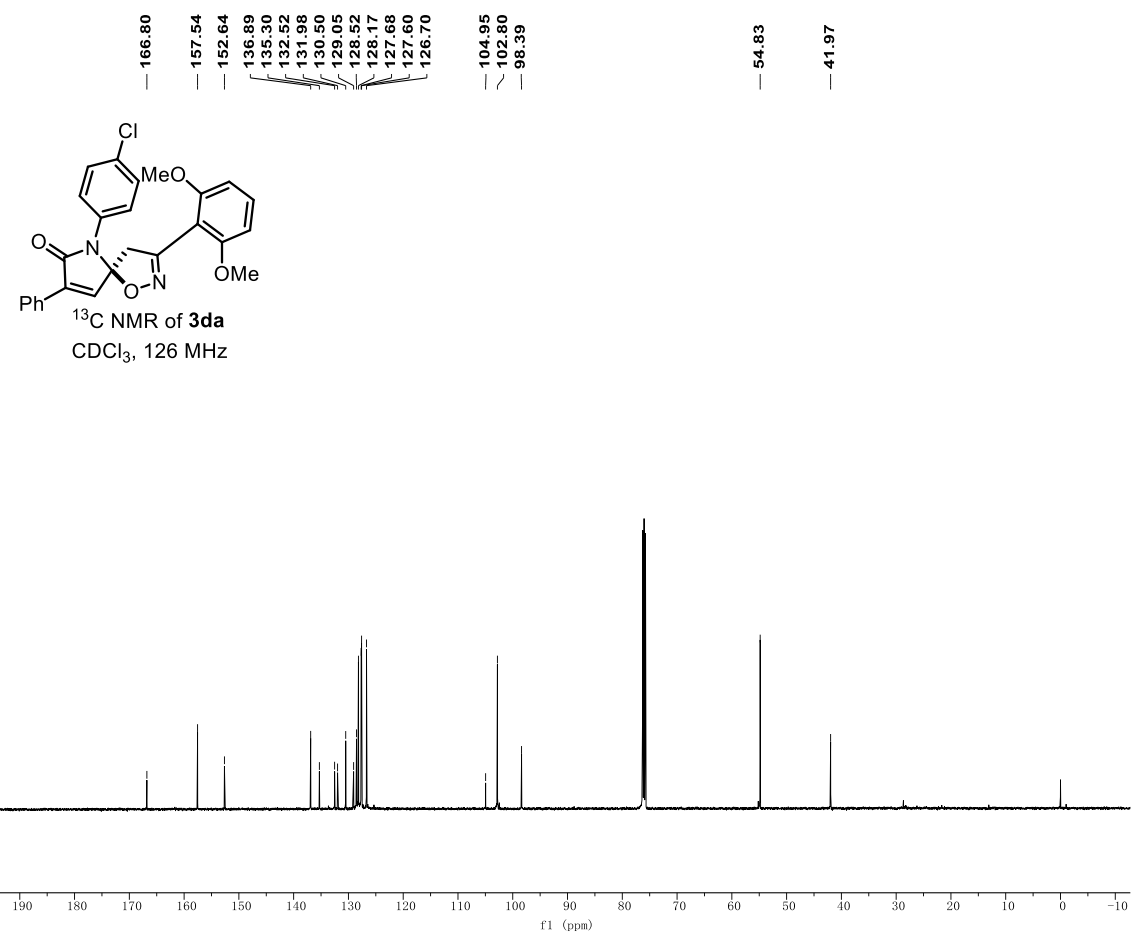

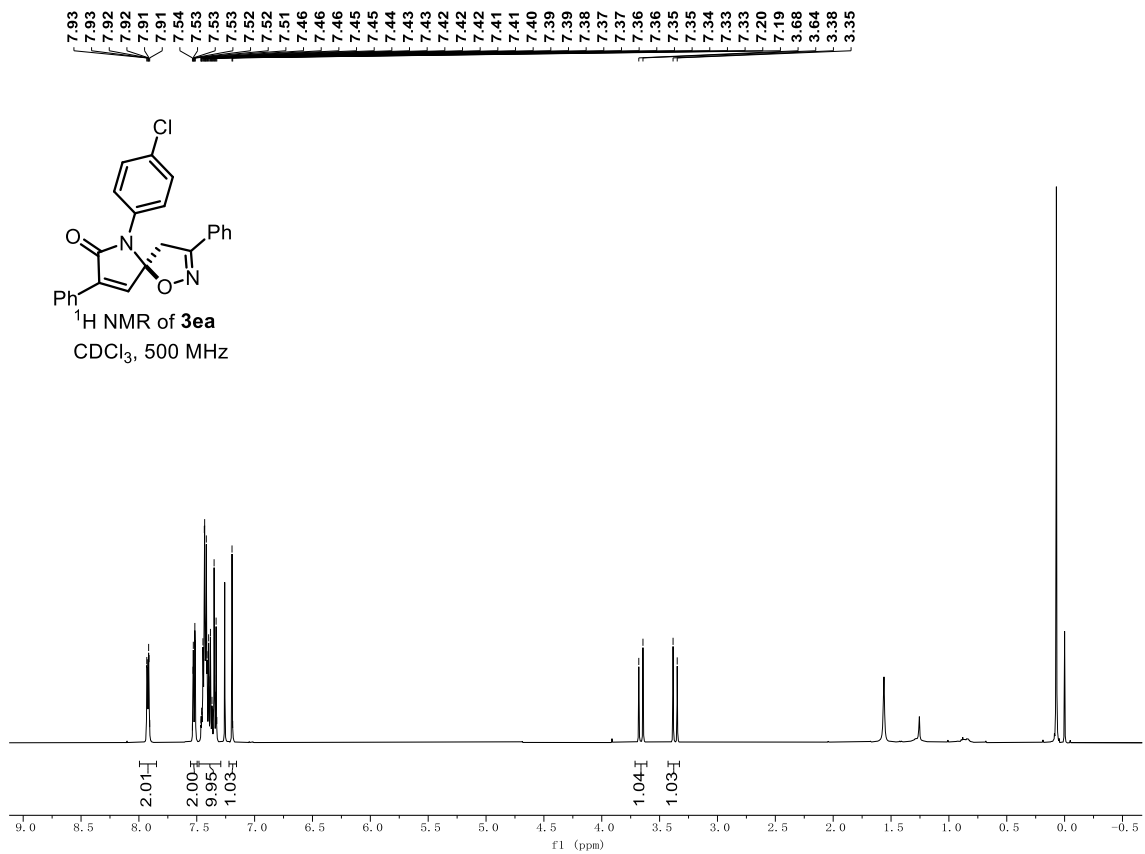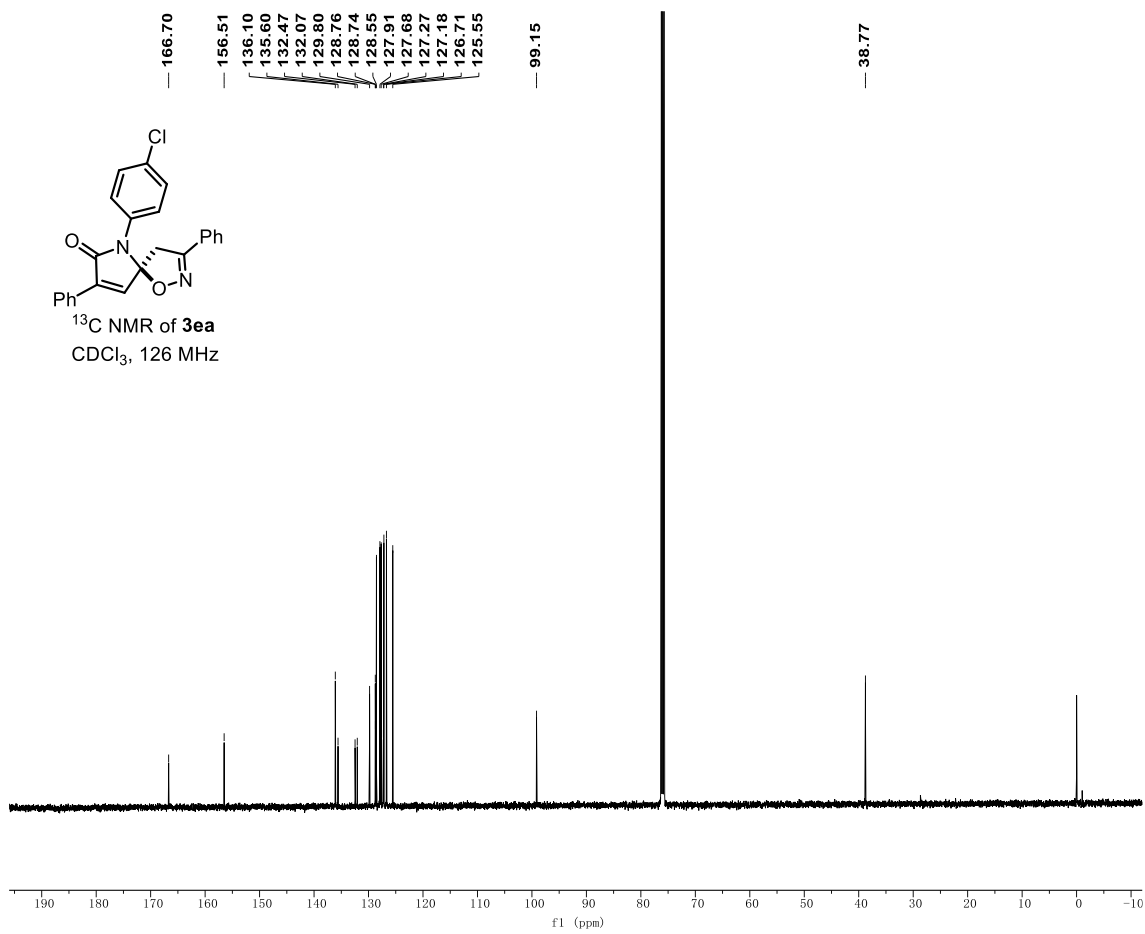

7.83  
7.82  
7.82  
7.81  
7.81  
7.55  
7.55  
7.54  
7.53  
7.40  
7.40  
7.39  
7.38  
7.37  
7.37  
7.36  
7.36  
7.36  
7.35  
7.34  
7.34  
7.33  
7.32  
7.31  
7.31  
7.30  
7.30  
7.30  
7.29  
7.29  
7.29  
7.27  
7.27  
7.26  
7.26  
7.25  
7.25  
7.22  
7.22  
7.21  
7.21  
7.20  
7.20  
7.19  
7.19  
7.18  
7.18  
7.17  
7.17  
7.16  
7.16  
6.91  
6.91  
6.90  
6.90  
6.89  
6.89  
6.88  
6.88  
6.88  
3.65  
3.62  
3.44  
3.41

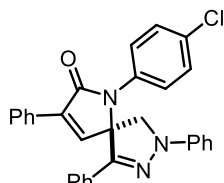

<sup>1</sup>H NMR of **5aa**  
CDCl<sub>3</sub>, 500 MHz

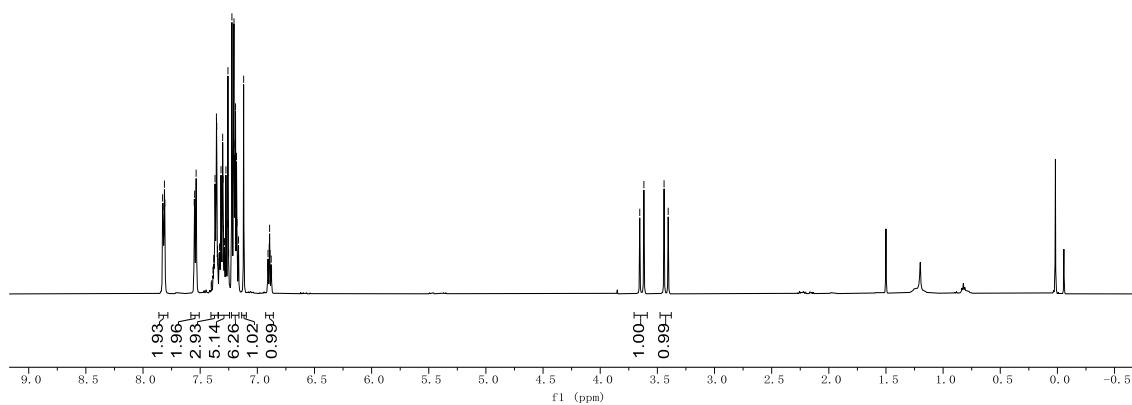

166.69  
146.19  
142.25  
139.27  
135.72  
132.81  
131.92  
130.51  
128.94  
128.60  
128.54  
128.31  
128.26  
127.70  
127.67  
126.59  
126.55  
124.56  
120.90  
114.79  
86.23  
41.39

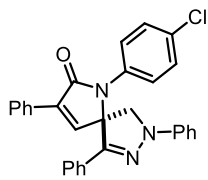

<sup>13</sup>C NMR of **5aa**  
CDCl<sub>3</sub>, 126 MHz

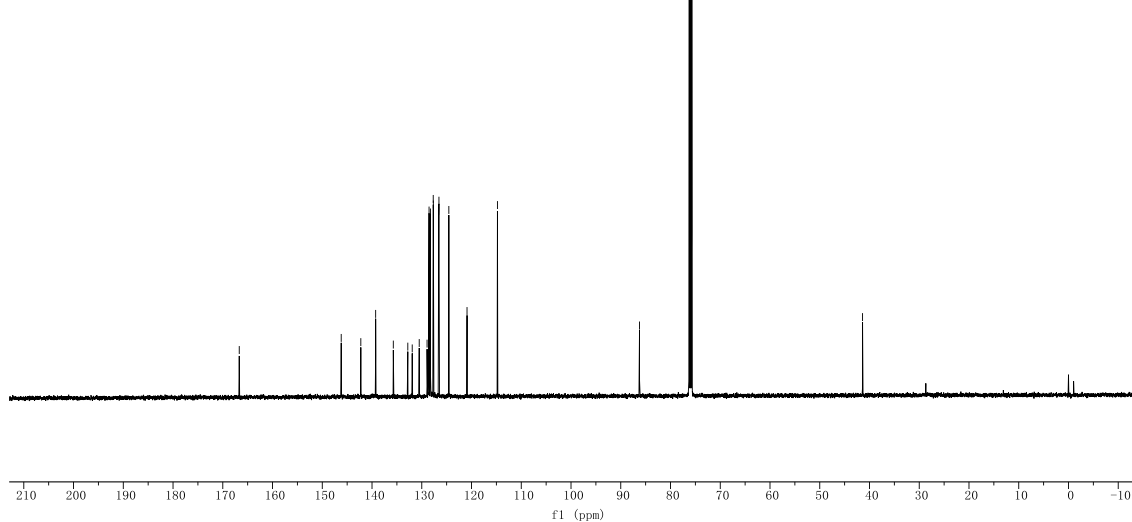

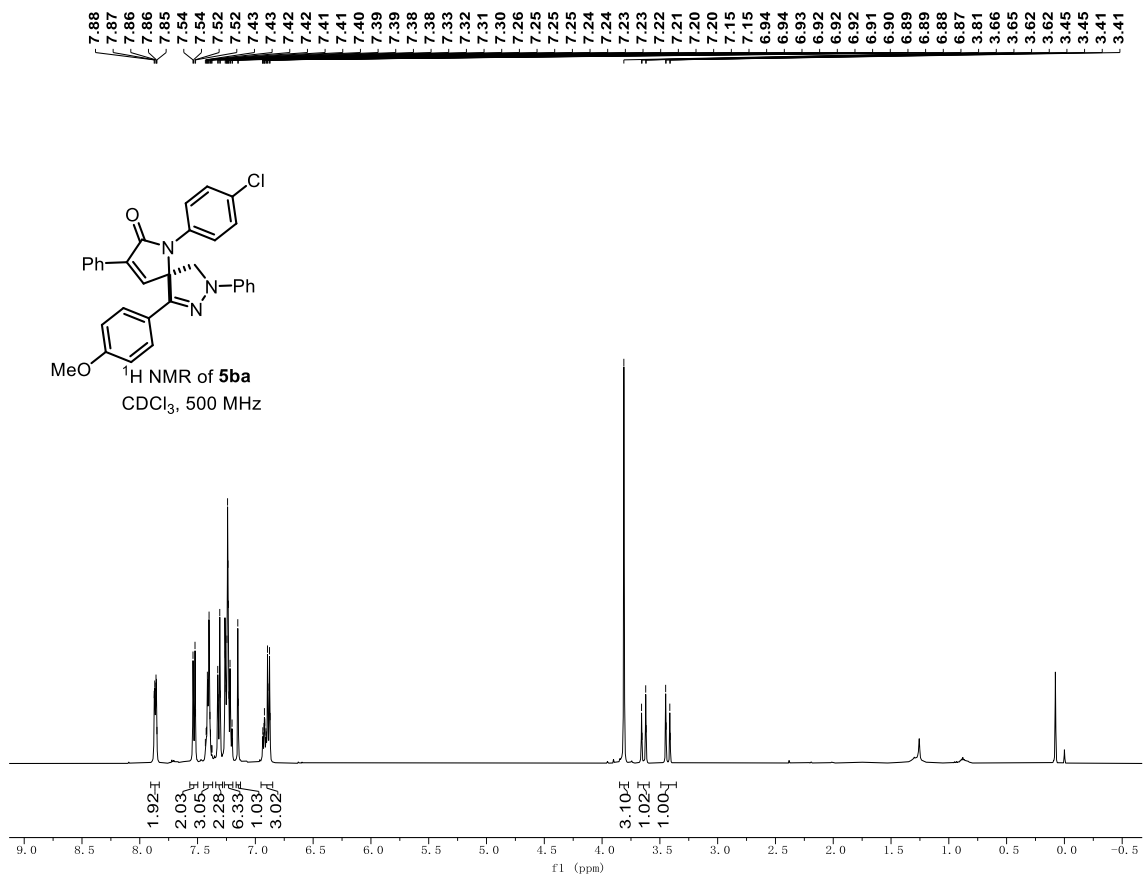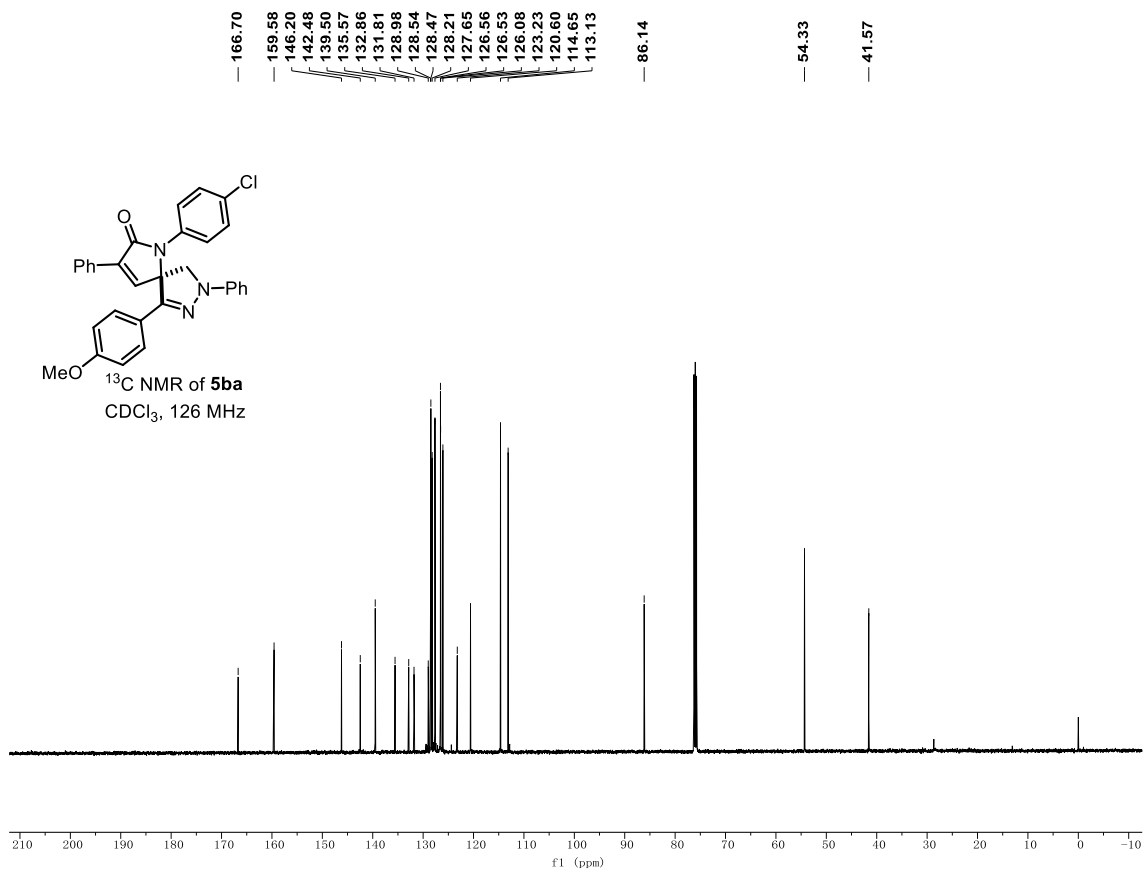

7.99  
7.98  
7.97  
7.97  
7.82  
7.81  
7.80  
7.48  
7.48  
7.47  
7.47  
7.46  
7.46  
7.45  
7.45  
7.45  
7.44  
7.44  
7.44  
7.44  
7.36  
7.35  
7.35  
7.34  
7.34  
7.33  
7.29  
7.28  
7.27  
7.27  
7.26  
7.25  
7.14  
7.14  
7.13  
7.12  
7.11  
7.11  
6.94  
6.93  
6.92  
6.92  
6.31  
4.75  
4.74  
4.72  
4.71  
2.89  
2.87  
2.84  
2.47  
2.45  
2.44  
2.43  
2.42

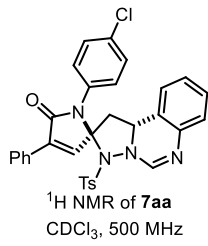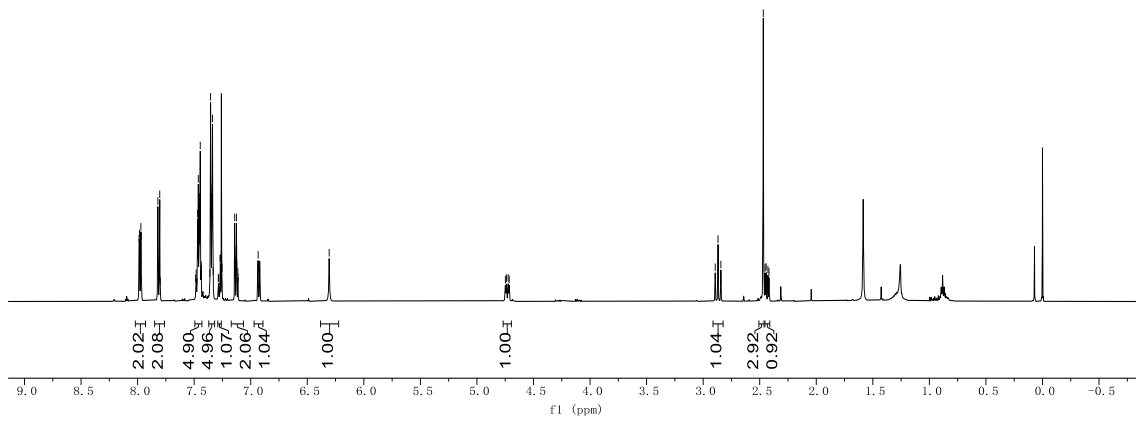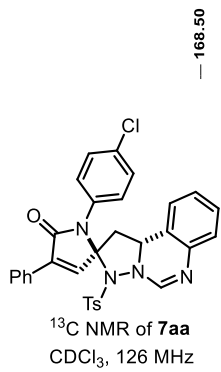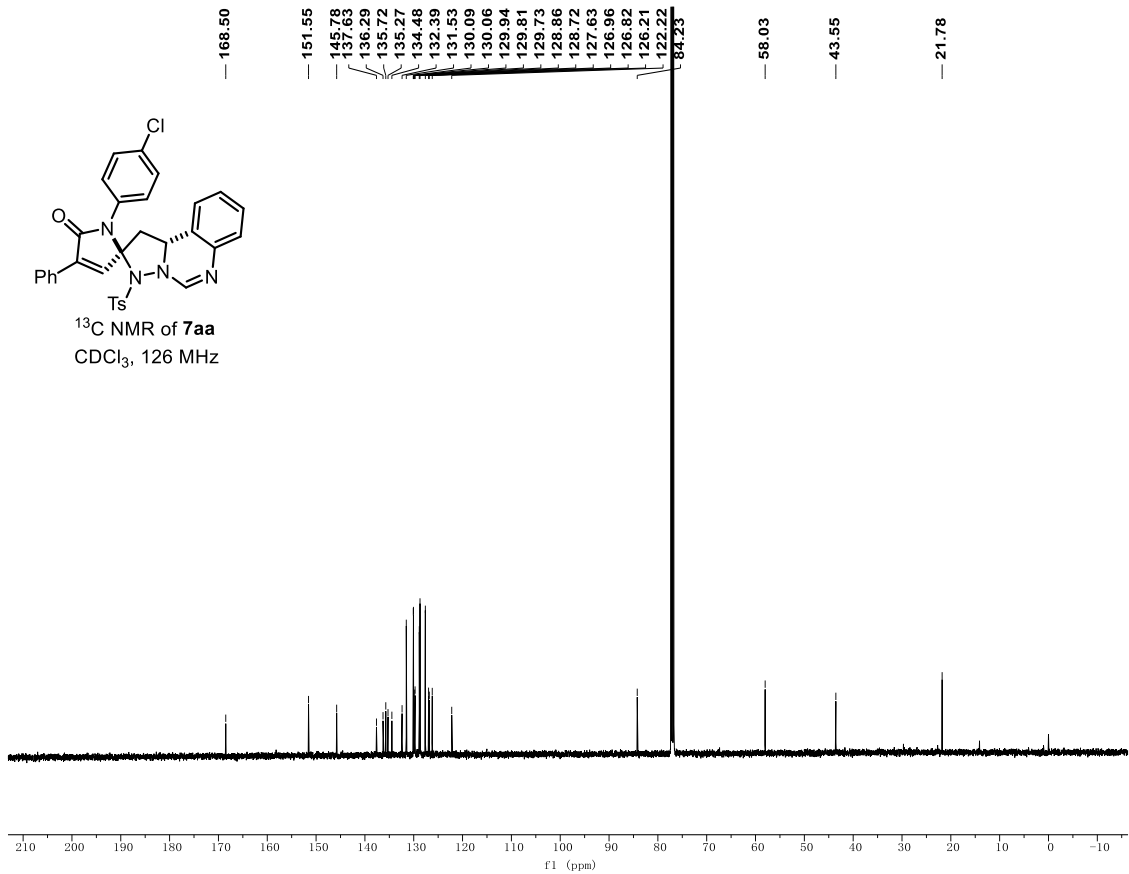

7.98  
7.97  
7.97  
7.96  
7.96  
7.81  
7.81  
7.80  
7.80  
7.48  
7.48  
7.47  
7.46  
7.46  
7.46  
7.45  
7.45  
7.45  
7.44  
7.44  
7.43  
7.43  
7.42  
7.42  
7.35  
7.35  
7.35  
7.34  
7.34  
7.33  
7.33  
7.32  
7.32  
7.11  
7.11  
7.10  
7.09  
6.96  
6.96  
6.95  
6.94  
6.93  
6.92  
6.66  
6.66  
6.64  
6.64  
6.64  
6.26  
4.71  
4.70  
4.68  
4.67  
2.87  
2.85  
2.82  
2.47  
2.44  
2.44  
2.43

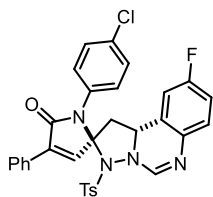

<sup>1</sup>H NMR of **7ba**  
CDCl<sub>3</sub>, 500 MHz

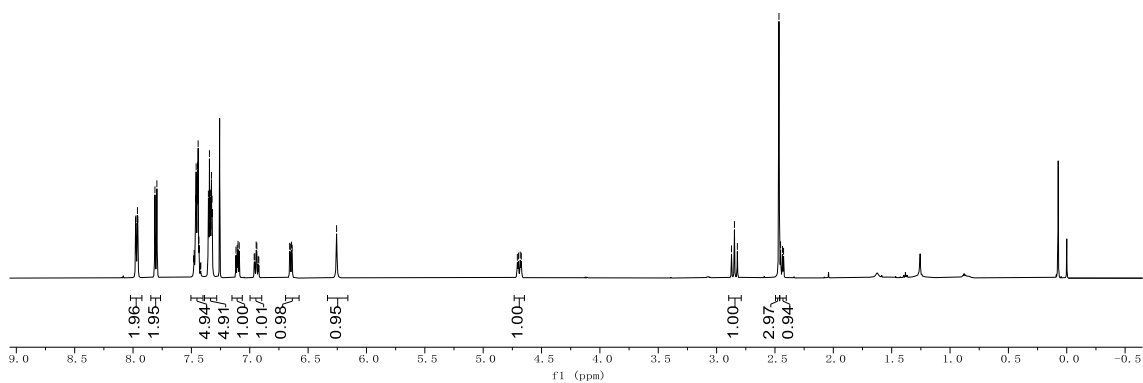

167.43  
160.76  
158.78  
149.77  
149.75  
144.86  
135.33  
134.49  
134.28  
133.35  
132.96  
132.93  
131.31  
130.51  
129.10  
129.05  
128.84  
128.75  
127.81  
127.71  
127.59  
127.52  
126.59  
122.95  
122.89  
115.48  
115.31  
112.21  
112.02  
83.14  
56.80  
42.34  
20.76

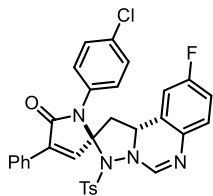

<sup>13</sup>C NMR of **7ba**  
CDCl<sub>3</sub>, 126 MHz

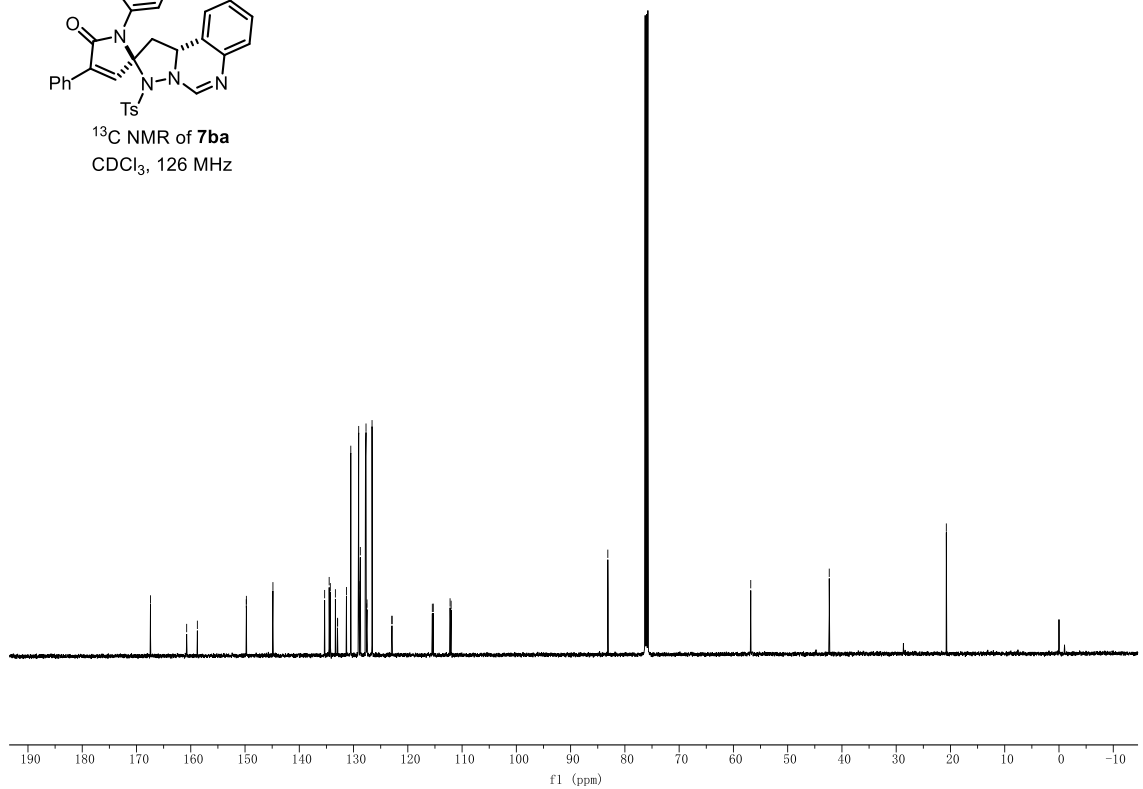

7.97  
7.97  
7.96  
7.96  
7.95  
7.95  
7.80  
7.80  
7.79  
7.79  
7.47  
7.46  
7.45  
7.45  
7.44  
7.44  
7.43  
7.43  
7.35  
7.35  
7.34  
7.34  
7.33  
7.33  
7.32  
7.32  
7.31  
7.31  
7.12  
7.11  
7.09  
7.09  
7.08  
7.07  
7.07  
6.86  
6.86  
6.28  
6.28  
4.74  
4.72  
4.71  
4.71  
2.85  
2.82  
2.80  
2.80  
2.45  
2.44  
2.43

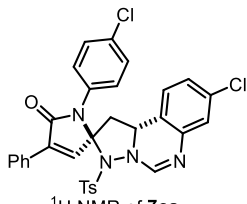

<sup>1</sup>H NMR of **7ca**  
CDCl<sub>3</sub>, 500 MHz

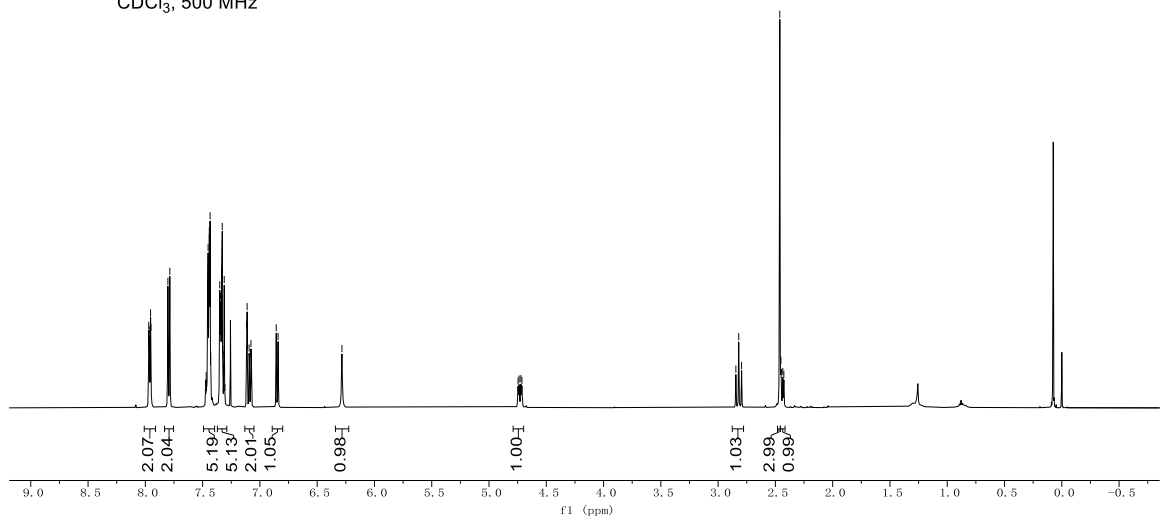

167.38  
151.26  
145.93  
134.52  
134.33  
134.30  
133.13  
131.27  
130.44  
129.15  
129.08  
128.82  
128.76  
127.82  
127.70  
126.59  
126.15  
125.86  
119.47  
83.13  
56.59  
42.57  
20.76

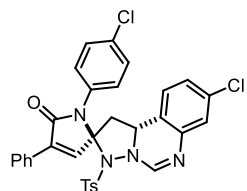

<sup>13</sup>C NMR of **7ca**  
CDCl<sub>3</sub>, 126 MHz

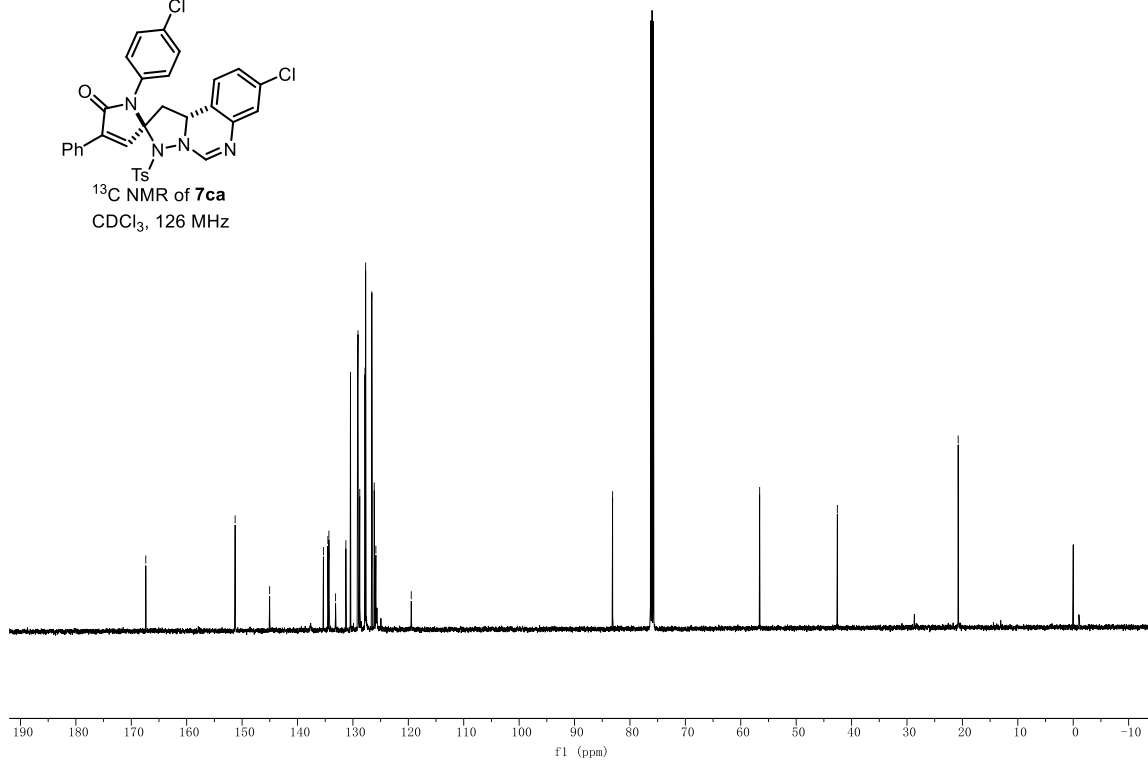

7.98  
7.98  
7.97  
7.97  
7.96  
7.81  
7.80  
7.47  
7.46  
7.45  
7.45  
7.44  
7.44  
7.35  
7.35  
7.33  
7.33  
7.32  
7.32  
7.08  
7.06  
7.04  
7.03  
6.75  
6.29  
4.70  
4.69  
4.68  
4.67

2.86  
2.84  
2.81  
2.47  
2.44  
2.43  
2.42  
2.41  
2.29

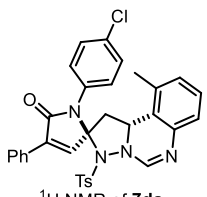

<sup>1</sup>H NMR of 7da  
CDCl<sub>3</sub>, 500 MHz

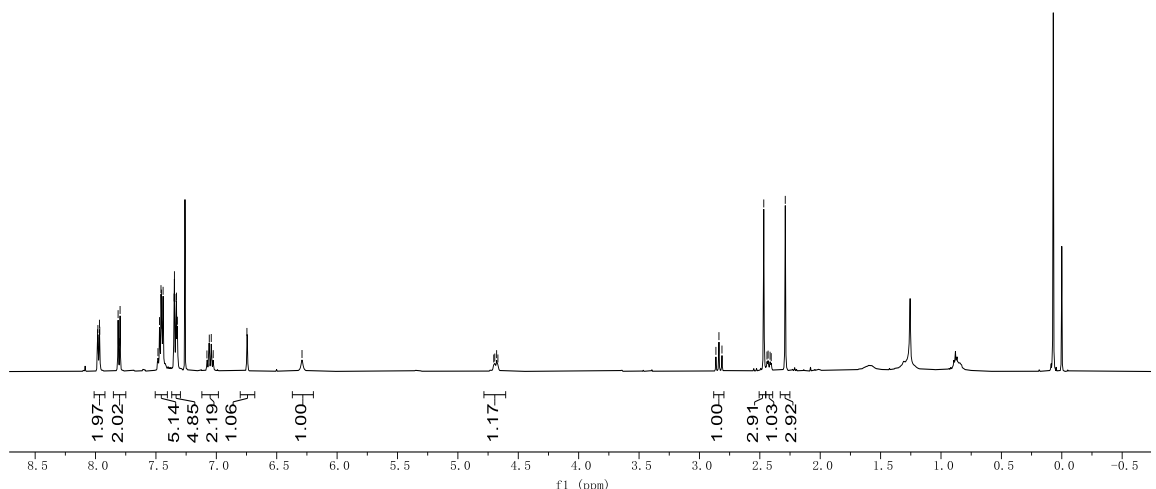

168.49  
150.82  
145.06  
137.07  
136.27  
135.73  
135.27  
134.50  
132.39  
131.51  
130.35  
130.08  
130.06  
129.96  
129.72  
128.86  
128.72  
127.62  
126.78  
84.31  
58.12  
43.55  
21.79  
21.05

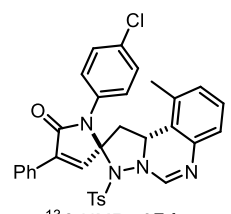

<sup>13</sup>C NMR of 7da  
CDCl<sub>3</sub>, 126 MHz

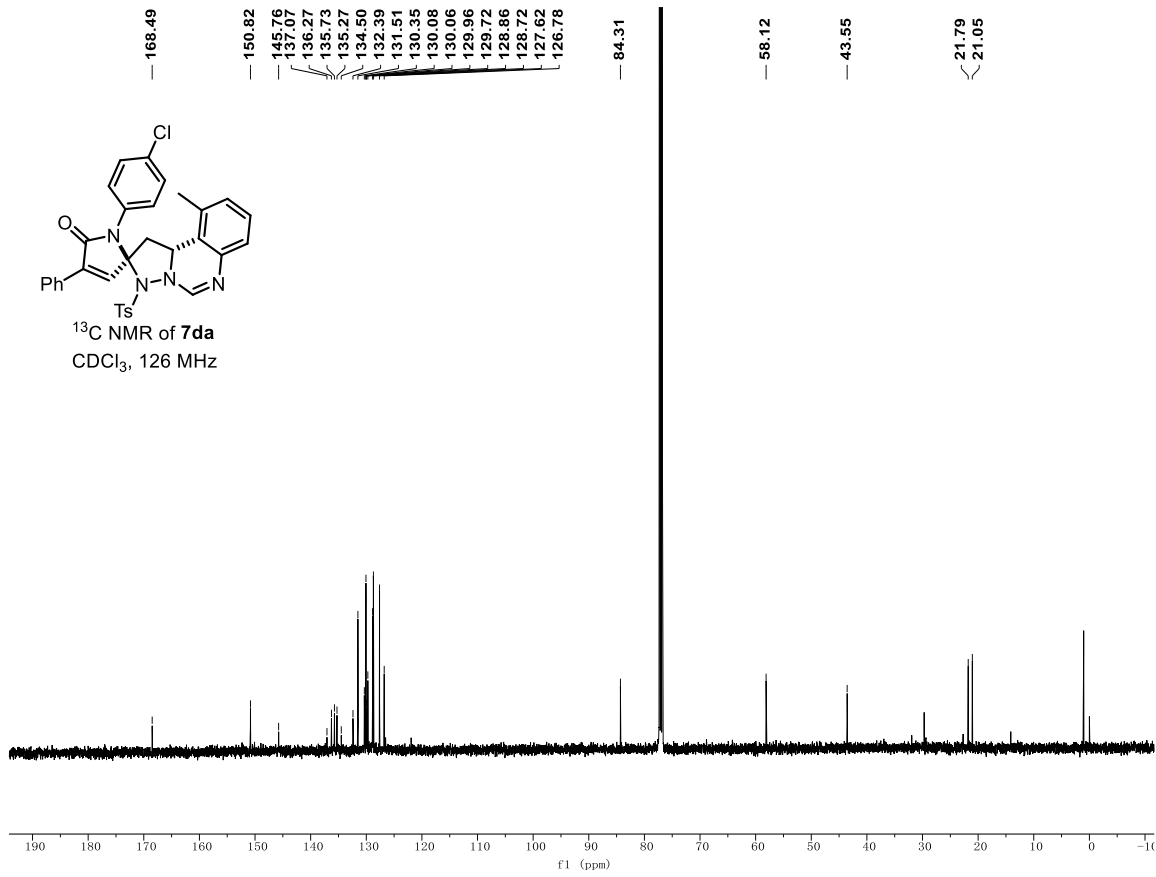



7.98  
7.97  
7.96  
7.96  
7.81  
7.81  
7.80  
7.79  
7.49  
7.47  
7.47  
7.46  
7.46  
7.45  
7.45  
7.44  
7.44  
7.44  
7.43  
7.43  
7.42  
7.42  
7.41  
7.41  
7.41  
7.40  
7.35  
7.35  
7.34  
7.34  
7.34  
7.33  
7.33  
7.32  
7.09  
7.09  
6.78  
6.78  
6.77  
6.76  
6.46  
6.46  
6.23  
6.23  
4.68  
4.67  
4.66  
4.65  
3.76  
2.85  
2.82  
2.80  
2.46  
2.44  
2.43  
2.42  
2.41

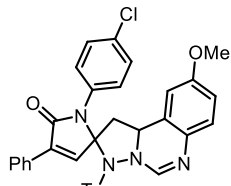

<sup>1</sup>H NMR of **7ea**  
CDCl<sub>3</sub>, 500 MHz

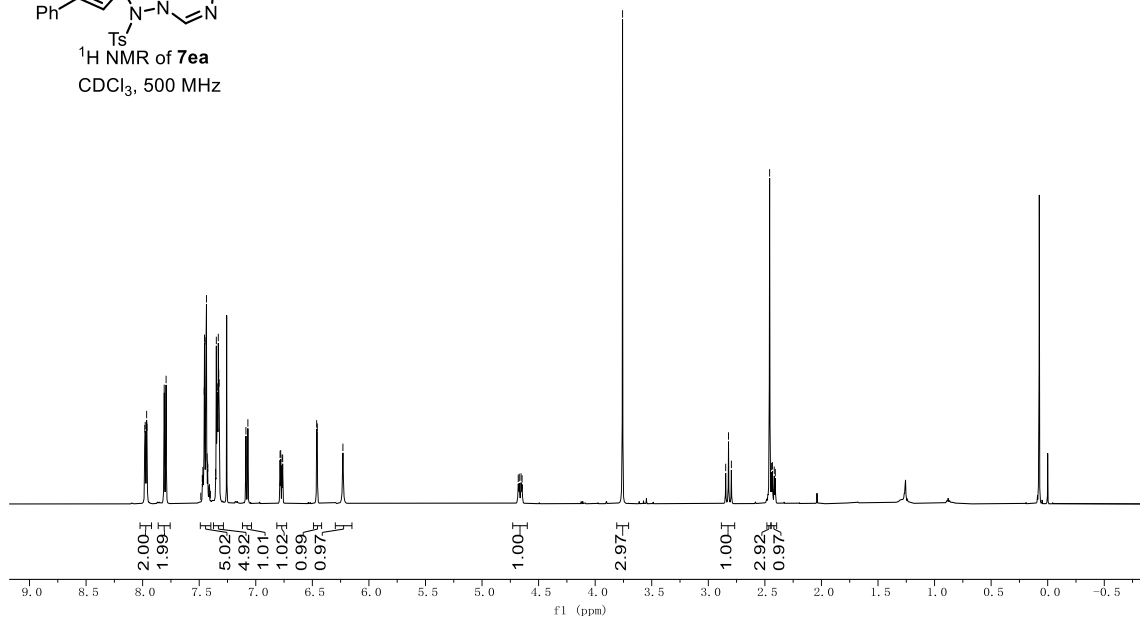

167.47  
157.25  
148.55  
144.68  
135.19  
134.76  
134.19  
133.53  
131.41  
130.51  
130.03  
129.03  
128.94  
128.67  
127.80  
127.68  
126.98  
126.58  
122.45  
113.14  
111.01  
83.38  
57.24  
54.53  
42.35  
20.74

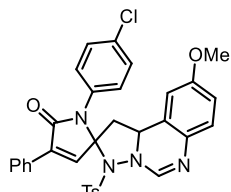

<sup>13</sup>C NMR of **7ea**  
CDCl<sub>3</sub>, 126 MHz

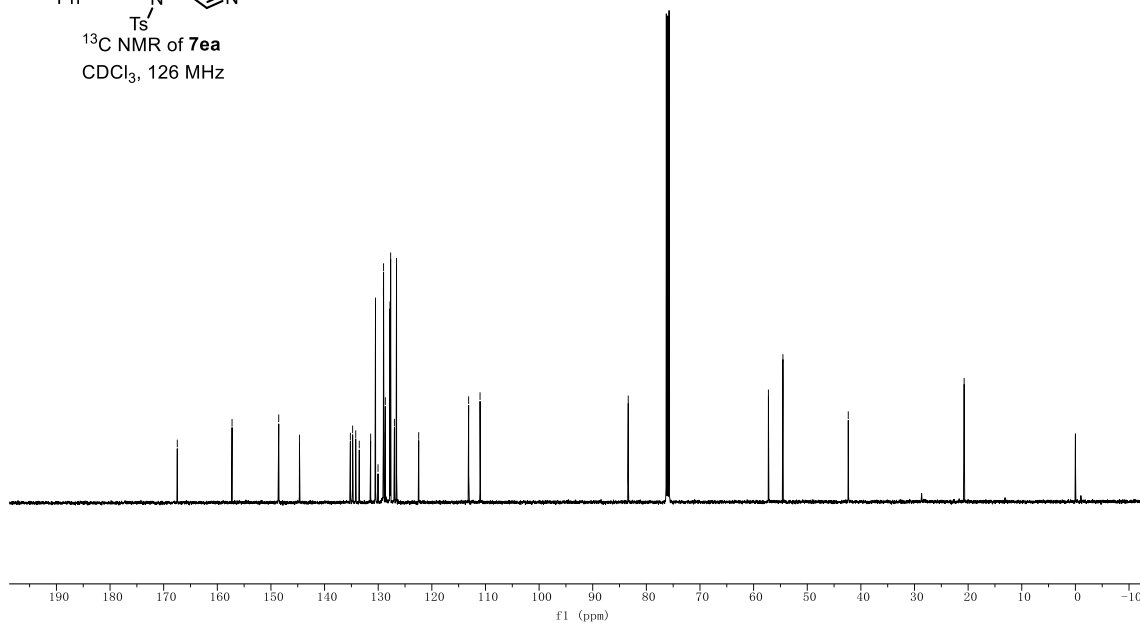

7.98  
7.97  
7.96  
7.96  
7.81  
7.81  
7.80  
7.78  
7.78  
7.48  
7.47  
7.46  
7.46  
7.45  
7.45  
7.44  
7.44  
7.43  
7.43  
7.35  
7.35  
7.34  
7.34  
7.33  
7.33  
7.30  
6.84  
6.82  
6.70  
6.69  
6.68  
6.68  
6.67  
6.66  
6.34  
4.69  
4.68  
4.68  
4.66  
4.65  
3.76  
2.82  
2.80  
2.77  
2.47  
2.41  
2.40  
2.38  
2.38

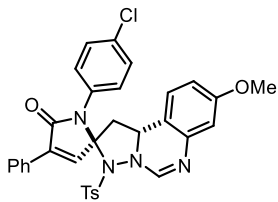

<sup>1</sup>H NMR of 7fa  
CDCl<sub>3</sub>, 500 MHz

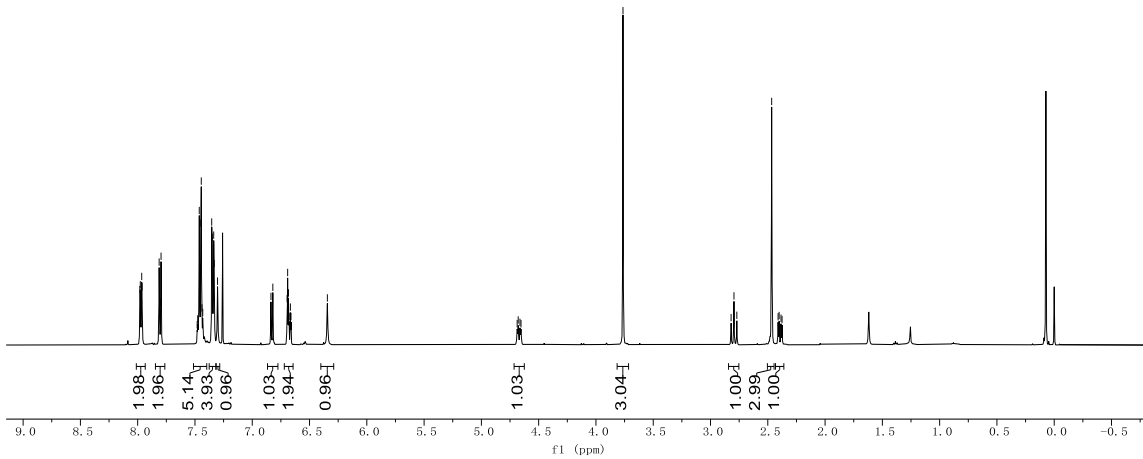

167.44  
159.70  
150.97  
144.74  
137.73  
135.21  
134.68  
134.21  
133.50  
131.39  
130.51  
129.06  
129.02  
128.92  
128.69  
127.81  
127.69  
126.58  
125.92  
113.07  
112.16  
110.51  
83.29  
56.75  
54.43  
42.64  
20.76

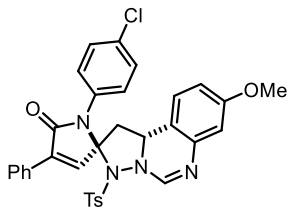

<sup>13</sup>C NMR of 7fa  
CDCl<sub>3</sub>, 126 MHz

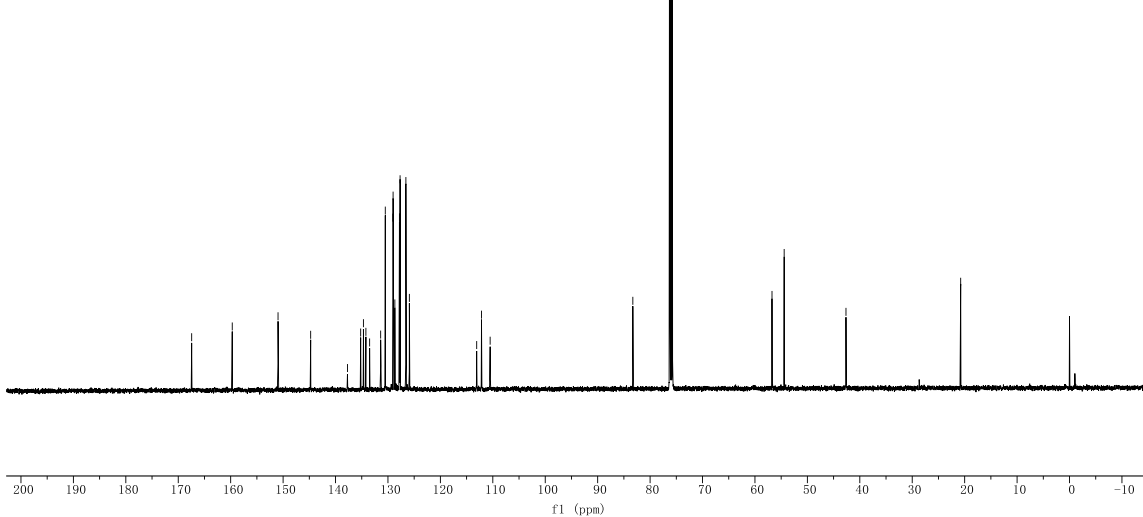

7.98  
7.97  
7.97  
7.96  
7.96  
7.95  
7.85  
7.84  
7.83  
7.83  
7.55  
7.55  
7.54  
7.54  
7.48  
7.47  
7.47  
7.46  
7.46  
7.46  
7.45  
7.45  
7.45  
7.44  
7.44  
7.44  
7.43  
7.43  
7.36  
7.36  
7.35  
7.35  
7.34  
7.34  
7.33  
7.29  
7.28  
7.27  
7.27  
7.15  
7.13  
7.13  
7.12  
7.11  
6.95  
6.94  
6.93  
6.38  
4.80  
4.79  
4.77  
4.76  
2.89  
2.87  
2.84  
2.47  
2.46  
2.44  
2.43  
1.36

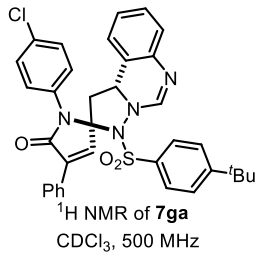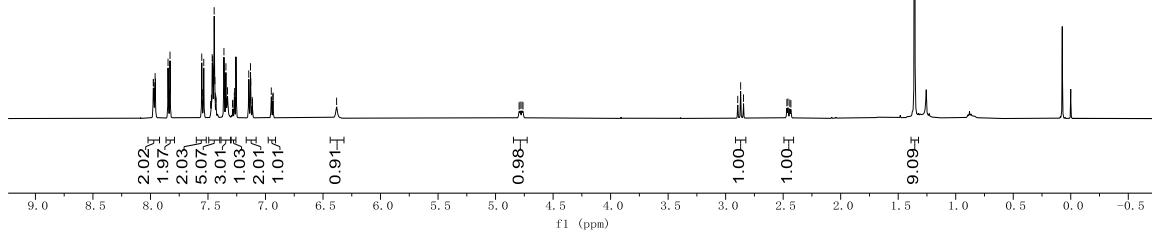

167.42  
157.72  
150.56  
135.13  
134.82  
134.24  
133.37  
131.36  
130.46  
129.05  
128.87  
128.79  
128.70  
127.66  
126.61  
126.00  
125.64  
125.48  
125.20  
121.16  
83.21  
57.05  
42.50  
34.42  
30.01

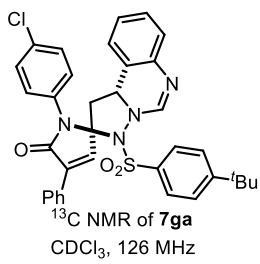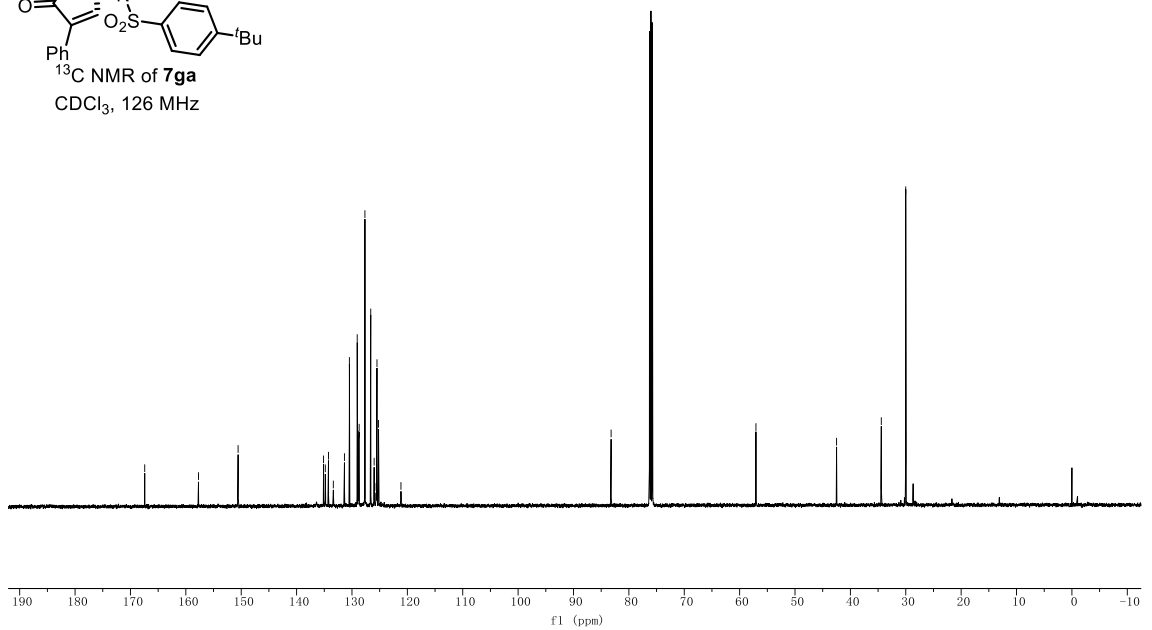

8.01  
8.01  
8.00  
8.00  
7.99  
7.99  
7.91  
7.91  
7.47  
7.46  
7.46  
7.45  
7.45  
7.44  
7.44  
7.43  
7.43  
7.42  
7.42  
7.41  
7.40  
7.40  
7.36  
7.35  
7.35  
7.34  
7.34  
7.33  
7.29  
7.28  
7.28  
7.27  
7.27  
7.26  
7.24  
7.24  
7.23  
7.22  
7.22  
7.15  
7.14  
7.13  
7.13  
7.12  
7.11  
7.06  
7.06  
7.05  
7.05  
7.04  
7.04  
6.99  
6.99  
6.98  
6.97  
5.88  
5.88  
5.34  
5.33  
5.32  
5.31  
2.94  
2.92  
2.92  
2.89  
2.76  
2.75  
2.74  
2.73  
2.63  
2.30

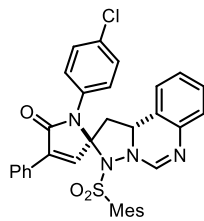

<sup>1</sup>H NMR of **7ha**  
CDCl<sub>3</sub>, 500 MHz

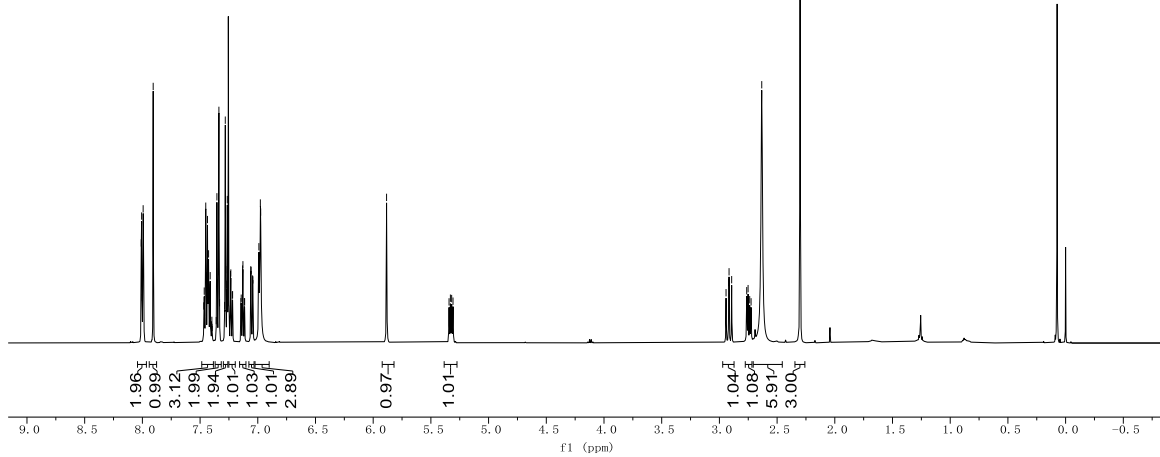

167.74  
148.26  
143.71  
136.74  
136.54  
133.90  
133.51  
132.09  
131.35  
129.32  
129.10  
129.04  
128.88  
128.52  
128.48  
127.63  
126.80  
125.88  
125.71  
125.25  
121.35  
84.29  
57.05  
43.98  
22.22  
20.11

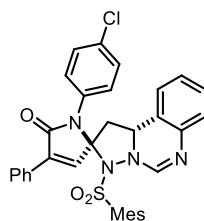

<sup>13</sup>C NMR of **7ha**  
CDCl<sub>3</sub>, 126 MHz

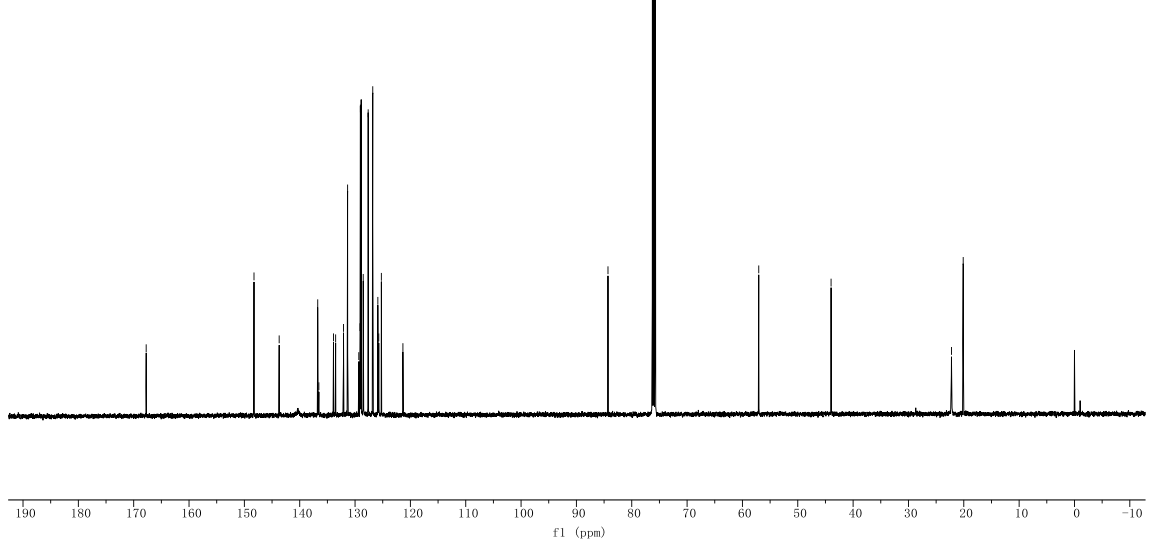

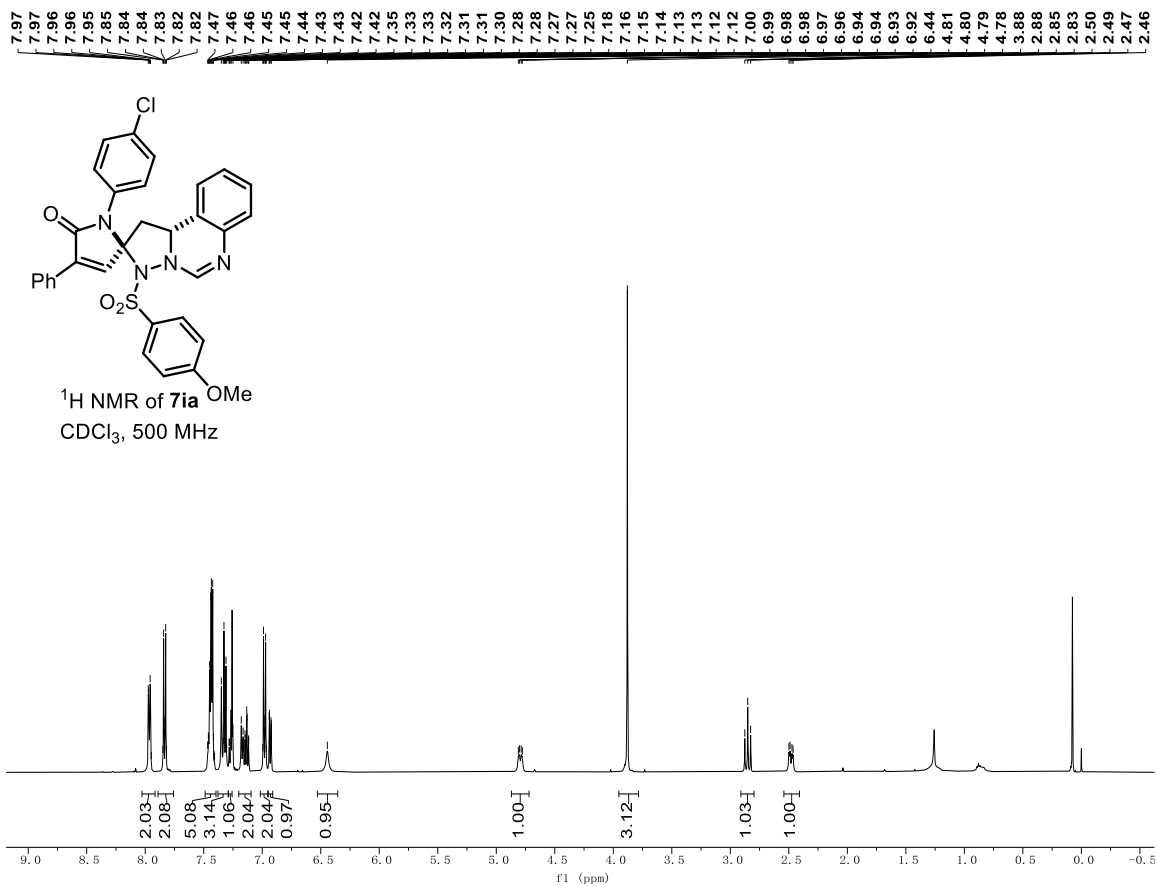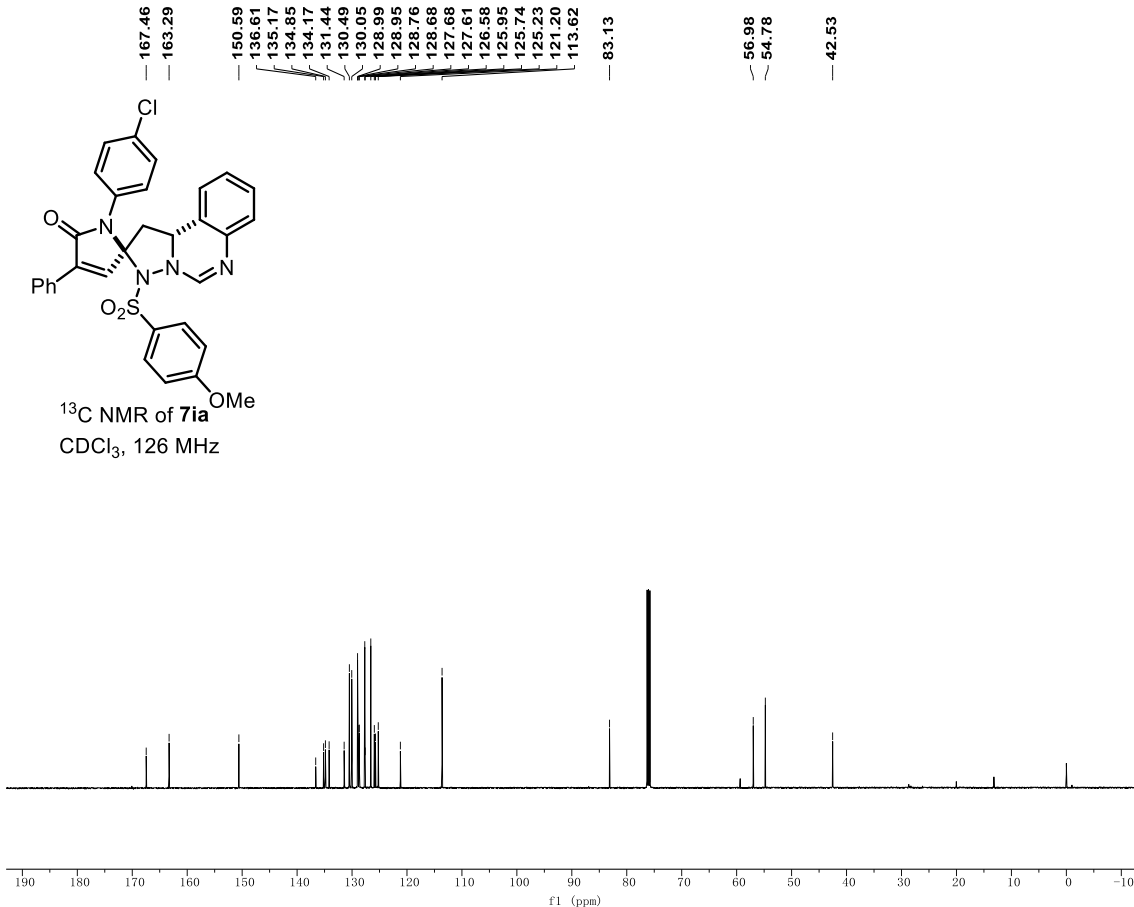

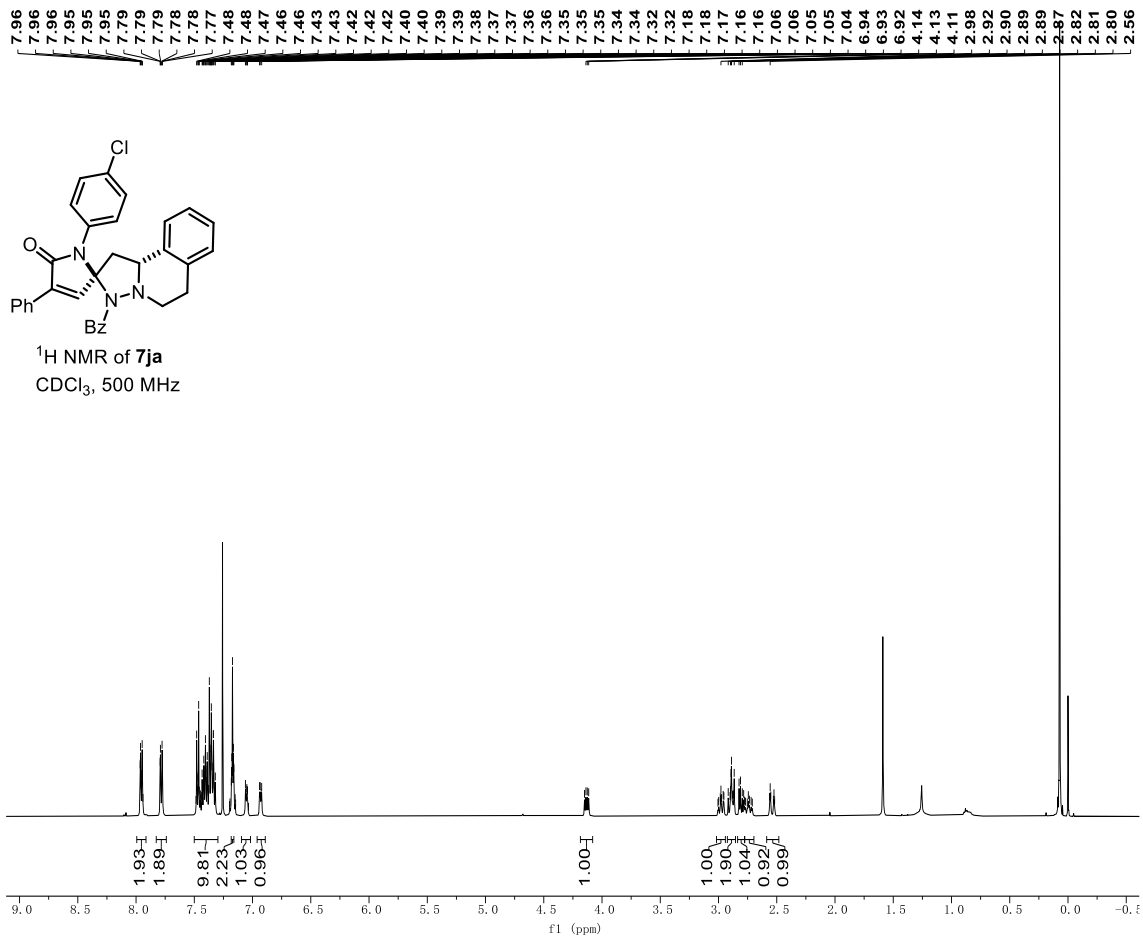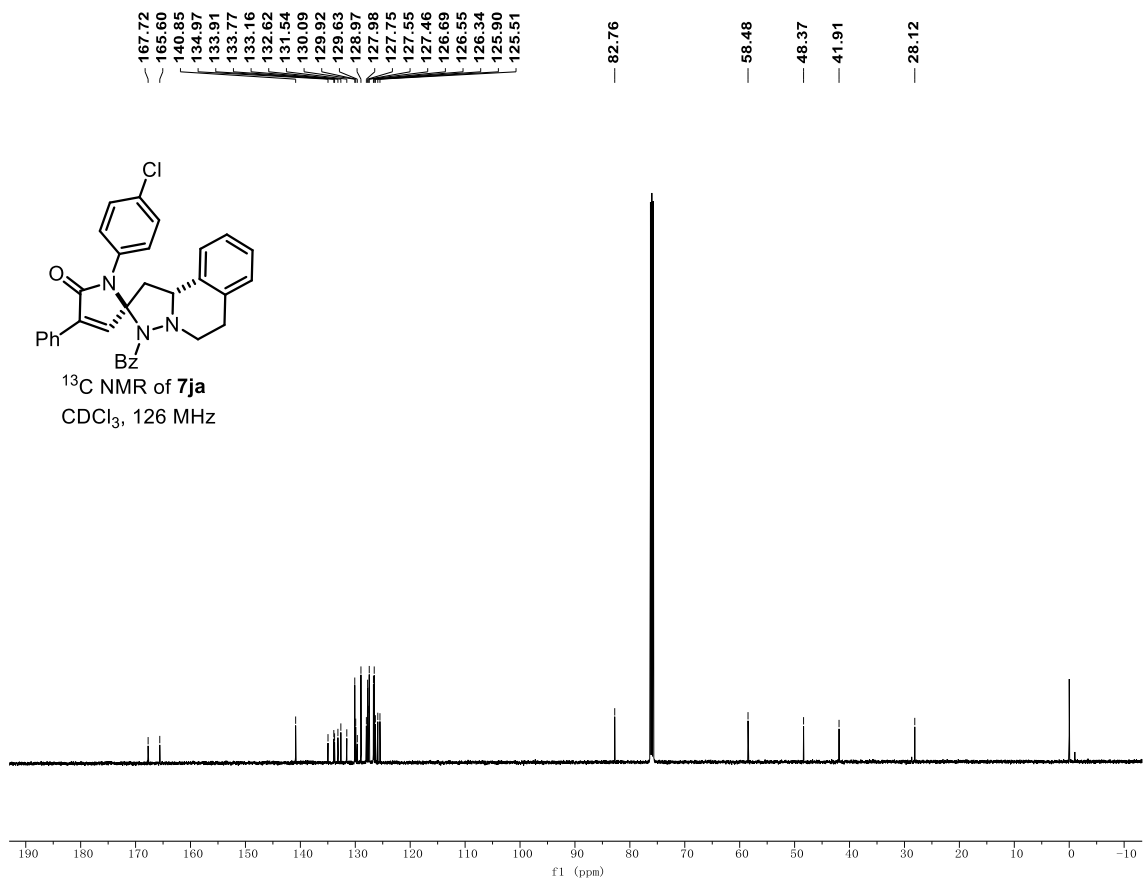

7.96  
7.96  
7.95  
7.95  
7.94  
7.94  
7.77  
7.76  
7.75  
7.75  
7.47  
7.47  
7.46  
7.46  
7.45  
7.45  
7.44  
7.44  
7.42  
7.42  
7.42  
7.41  
7.41  
7.40  
7.39  
7.39  
7.38  
7.37  
7.37  
7.36  
7.36  
7.35  
7.35  
7.34  
7.34  
7.33  
7.33  
7.25  
7.25  
7.23  
7.23  
7.16  
7.14  
7.11  
7.11  
6.85  
6.83  
4.10  
4.10  
4.09  
4.08  
2.95  
2.94  
2.93  
2.92  
2.89  
2.89  
2.86  
2.86  
2.82  
2.82  
2.81

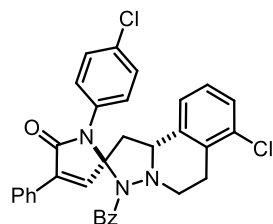

<sup>1</sup>H NMR of 7ka  
CDCl<sub>3</sub>, 500 MHz

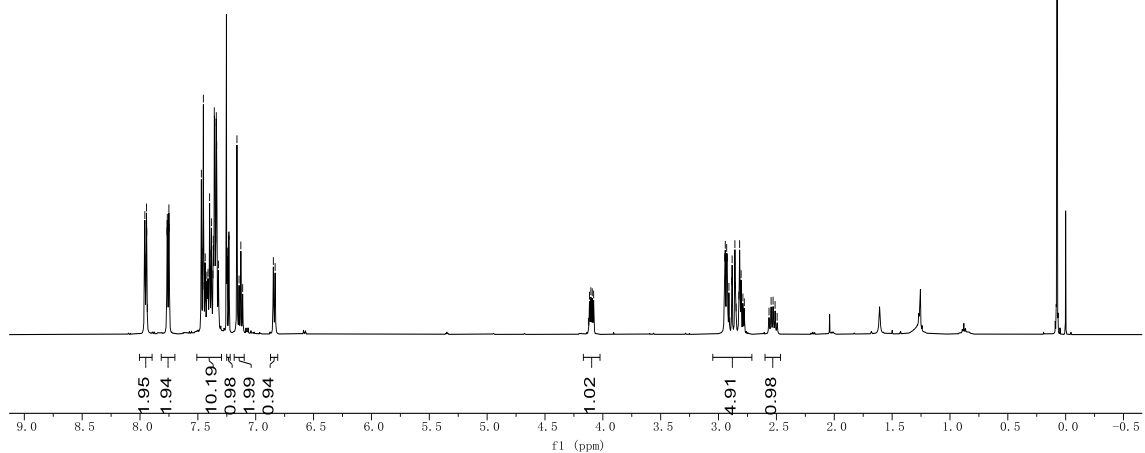

167.66  
165.59  
140.66  
135.07  
134.66  
133.82  
133.79  
133.11  
133.07  
130.07  
130.01  
129.96  
129.57  
129.01  
128.04  
127.67  
127.47  
127.00  
126.76  
126.55  
124.44

82.66

58.27

47.89

41.70

26.19

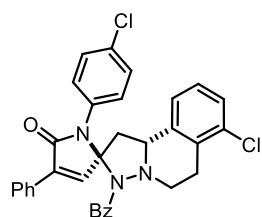

<sup>13</sup>C NMR of 7ka  
CDCl<sub>3</sub>, 126 MHz

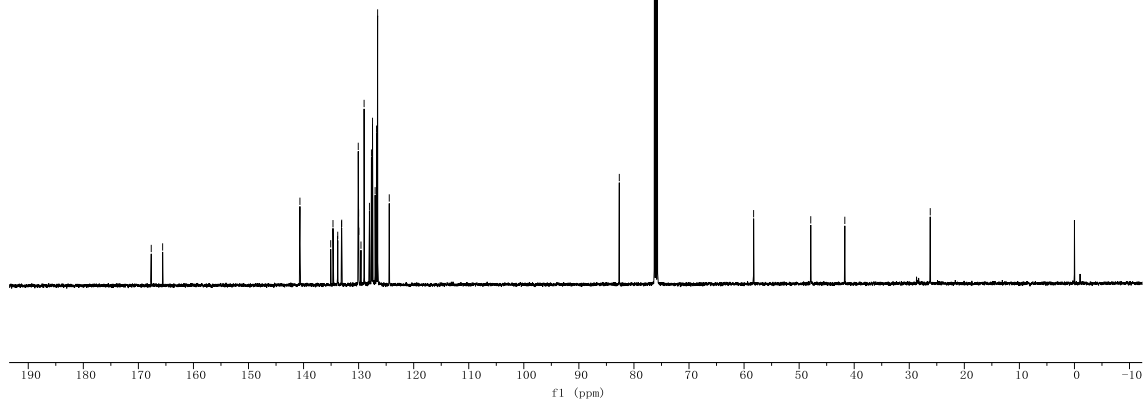

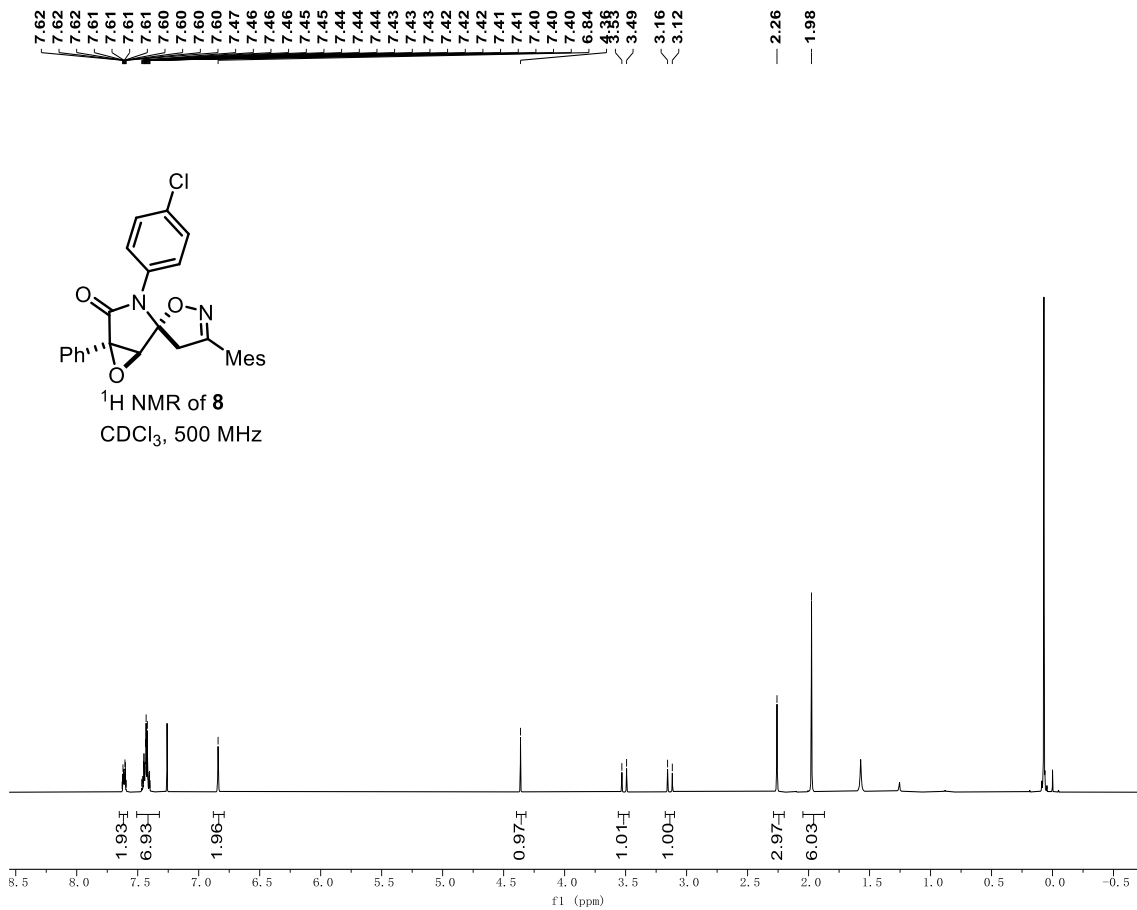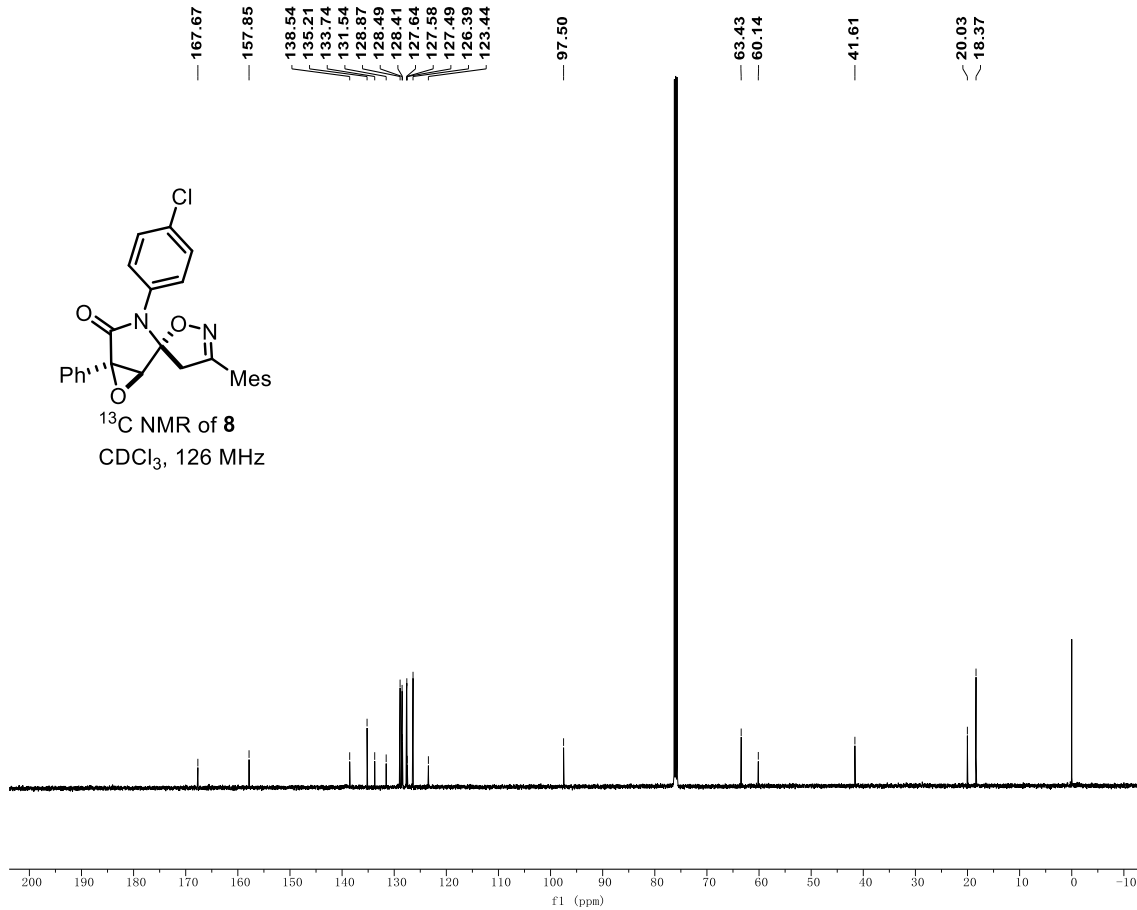



## X-Ray Crystallographic Data of **3aa**, **7ja** and **8**

Crystallographic data for **3aa**, **7ja** and **8** have been deposited with the Cambridge Crystallographic Data Centre as deposition number 2293891, 2293893 and 2293898, respectively. These data can be obtained free of charge via [www.ccdc.cam.ac.uk/data\\_request/cif](http://www.ccdc.cam.ac.uk/data_request/cif), or by emailing [data\\_request@ccdc.cam.ac.uk](mailto:data_request@ccdc.cam.ac.uk), or by contacting The Cambridge Crystallographic Data Centre, 12, Union Road, Cambridge CB2 1EZ, UK; fax: +44 1223 336033.

Single crystals of **3aa** were obtained by slow evaporation of a solution containing **3aa** in the mixture of petroleum ether and ethyl acetate at room temperature. A suitable crystal was selected and the crystal data and structure refinement results for compound **3aa** are listed in the Table S1.

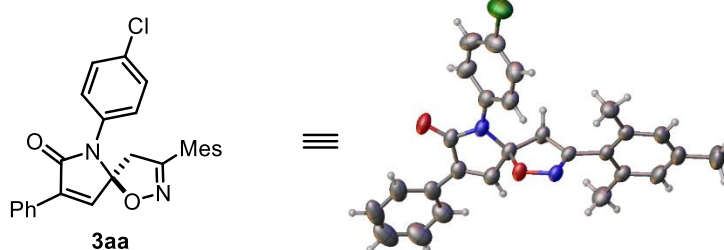

**Figure S1.** ORTEP view of the compound **3aa** with thermal ellipsoids drawn at the 50% probability level

**Table S1.** Crystal data and structure refinement for **3aa**.

|                        |                                                                 |
|------------------------|-----------------------------------------------------------------|
| Identification code    | <b>3aa</b>                                                      |
| Empirical formula      | C <sub>27</sub> H <sub>23</sub> ClN <sub>2</sub> O <sub>2</sub> |
| Formula weight         | 442.92                                                          |
| Temperature/K          | 298.15                                                          |
| Crystal system         | monoclinic                                                      |
| Space group            | P2 <sub>1</sub> /n                                              |
| a/Å                    | 9.8079(5)                                                       |
| b/Å                    | 20.5558(11)                                                     |
| c/Å                    | 22.6273(12)                                                     |
| α/°                    | 90                                                              |
| β/°                    | 94.844(2)                                                       |
| γ/°                    | 90                                                              |
| Volume/ Å <sup>3</sup> | 4545.6(4)                                                       |

|                                                |                                                               |
|------------------------------------------------|---------------------------------------------------------------|
| Z                                              | 8                                                             |
| $\rho_{\text{calc}}/\text{cm}^3$               | 1.294                                                         |
| $\mu/\text{mm}^{-1}$                           | 0.195                                                         |
| F(000)                                         | 1856.0                                                        |
| Crystal size/ $\text{mm}^3$                    | $0.13 \times 0.12 \times 0.1$                                 |
| Radiation                                      | MoK $\alpha$ ( $\lambda = 0.71073$ )                          |
| 2 $\theta$ range for data collection/ $^\circ$ | 2.682 to 52.754                                               |
| Index ranges                                   | $-12 \leq h \leq 9, -18 \leq k \leq 25, -28 \leq l \leq 27$   |
| Reflections collected                          | 42097                                                         |
| Independent reflections                        | 9237 [ $R_{\text{int}} = 0.0611, R_{\text{sigma}} = 0.0433$ ] |
| Data/restraints/parameters                     | 9237/0/583                                                    |
| Goodness-of-fit on $F^2$                       | 1.055                                                         |
| Final R indexes [ $I \geq 2\sigma(I)$ ]        | $R_1 = 0.0501, wR_2 = 0.1301$                                 |
| Final R indexes [all data]                     | $R_1 = 0.0703, wR_2 = 0.1423$                                 |
| Largest diff. peak/hole / $e \text{ \AA}^{-3}$ | 0.20/-0.36                                                    |

Single crystals of **7ja** were obtained by slow evaporation of a solution containing **7ja** in the mixture of petroleum ether and ethyl acetate at room temperature. A suitable crystal was selected and the crystal data and structure refinement results for compound **7ja** are listed in the Table S2.

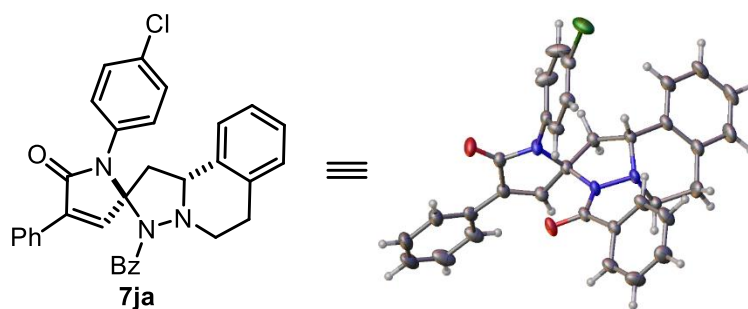

**Figure S2.** ORTEP view of the compound **7ja** with thermal ellipsoids drawn at the 50% probability level

**Table S2.** Crystal data and structure refinement for **7ja**.

|                     |                                                    |
|---------------------|----------------------------------------------------|
| Identification code | <b>7ja</b>                                         |
| Empirical formula   | $\text{C}_{33}\text{H}_{26}\text{ClN}_3\text{O}_2$ |

|                                             |                                                               |
|---------------------------------------------|---------------------------------------------------------------|
| Formula weight                              | 532.046                                                       |
| Temperature/K                               | 173                                                           |
| Crystal system                              | monoclinic                                                    |
| Space group                                 | P2 <sub>1</sub> /c                                            |
| a/Å                                         | 11.1281(2)                                                    |
| b/Å                                         | 17.8377(2)                                                    |
| c/Å                                         | 13.6750(2)                                                    |
| α/°                                         | 90                                                            |
| β/°                                         | 102.387(1)                                                    |
| γ/°                                         | 90                                                            |
| Volume/ Å <sup>3</sup>                      | 2651.29(7)                                                    |
| Z                                           | 4                                                             |
| ρ <sub>calc</sub> /cm <sup>3</sup>          | 1.333                                                         |
| μ/mm <sup>-1</sup>                          | 1.562                                                         |
| F(000)                                      | 1116.7                                                        |
| Crystal size/mm <sup>3</sup>                | 0.3 × 0.1 × 0.08                                              |
| Radiation                                   | Cu Kα (λ = 1.54184)                                           |
| 2θ range for data collection/°              | 8.14 to 151.64                                                |
| Index ranges                                | -13 ≤ h ≤ 13, -21 ≤ k ≤ 22, -11 ≤ l ≤ 17                      |
| Reflections collected                       | 18334                                                         |
| Independent reflections                     | 5394 [R <sub>int</sub> = 0.0397, R <sub>sigma</sub> = 0.0293] |
| Data/restraints/parameters                  | 5394/0/352                                                    |
| Goodness-of-fit on F <sup>2</sup>           | 1.049                                                         |
| Final R indexes [I ≥ 2σ (I)]                | R <sub>1</sub> = 0.0410, wR <sub>2</sub> = 0.0916             |
| Final R indexes [all data]                  | R <sub>1</sub> = 0.0455, wR <sub>2</sub> = 0.0951             |
| Largest diff. peak/hole / e Å <sup>-3</sup> | 0.40/-0.49                                                    |

Single crystals of **8** were obtained by slow evaporation of a solution containing **8** in the mixture of petroleum ether and ethyl acetate at room temperature. A suitable crystal was selected and the crystal data and structure refinement results for compound **8** are listed in the Table S3.

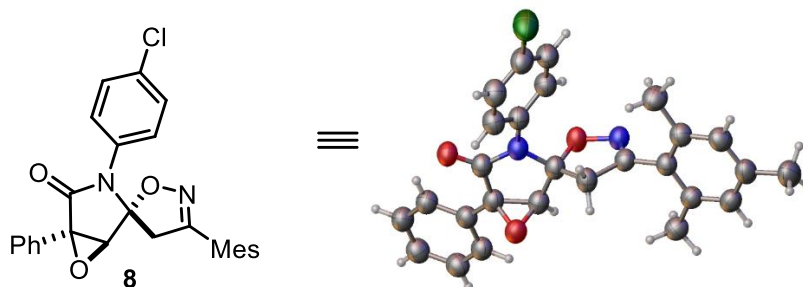

**Figure S3.** ORTEP view of the compound **8** with thermal ellipsoids drawn at the 50% probability level

**Table S3.** Crystal data and structure refinement for **8**

|                                  |                               |
|----------------------------------|-------------------------------|
| Identification code              | <b>8</b>                      |
| Empirical formula                | $C_{27}H_{23.5}ClN_2O_{3.25}$ |
| Formula weight                   | 463.43                        |
| Temperature/K                    | 150(2)                        |
| Crystal system                   | triclinic                     |
| Space group                      | P-1                           |
| a/Å                              | 9.2073(3)                     |
| b/Å                              | 14.4300(5)                    |
| c/Å                              | 18.0454(5)                    |
| $\alpha/^\circ$                  | 76.612(2)                     |
| $\beta/^\circ$                   | 83.712(2)                     |
| $\gamma/^\circ$                  | 82.660(2)                     |
| Volume/Å <sup>3</sup>            | 2305.32(13)                   |
| Z                                | 4                             |
| $\rho_{\text{calc}}/\text{cm}^3$ | 1.335                         |
| $\mu/\text{mm}^{-1}$             | 1.738                         |
| F(000)                           | 970.0                         |
| Crystal size/mm <sup>3</sup>     | 0.15 × 0.12 × 0.1             |

|                                                  |                                                               |
|--------------------------------------------------|---------------------------------------------------------------|
| Radiation                                        | CuK $\alpha$ ( $\lambda = 1.54178$ )                          |
| 2 $\Theta$ range for data collection/ $^{\circ}$ | 5.052 to 149.788                                              |
| Index ranges                                     | $-11 \leq h \leq 11, -18 \leq k \leq 18, -22 \leq l \leq 22$  |
| Reflections collected                            | 29955                                                         |
| Independent reflections                          | 9422 [ $R_{\text{int}} = 0.0381, R_{\text{sigma}} = 0.0454$ ] |
| Data/restraints/parameters                       | 9422/0/609                                                    |
| Goodness-of-fit on $F^2$                         | 1.065                                                         |
| Final R indexes [ $I \geq 2\sigma(I)$ ]          | $R_1 = 0.0781, wR_2 = 0.2103$                                 |
| Final R indexes [all data]                       | $R_1 = 0.0841, wR_2 = 0.2210$                                 |
| Largest diff. peak/hole / e $\text{\AA}^{-3}$    | 0.66/-0.71                                                    |

---
